# Supplementary material for: Highly accurate reference and method selection for universal cross–data set cell type annotation with CAMUS
Source: HighWire-hosted journal article supplement (doi:10.1101/gr.280821.125), 2025-10-01
Supplement: Supplemental_Table_S1_.xlsx [file Supplemental_Table_S1_.xlsx]

## Sheet: Sheet1
Supplemental Table 1a. Detailed information of cross-species data pairs.
Reference	Query	Tissue
Lake_2018	Tasic18	Brain
Lake_2018	Quake_Smart-seq2_Brain_Non-Myeloid	Brain
Lake_2018	Campbell	Brain
Lake_2018	Chen	Brain
Lake_2018	Tosches_lizard	Brain
Lake_2018	Tosches_turtle	Brain
Tasic18	Lake_2018	Brain
Quake_Smart-seq2_Brain_Non-Myeloid	Lake_2018	Brain
Campbell	Lake_2018	Brain
Chen	Lake_2018	Brain
Tasic18	Tosches_lizard	Brain
Quake_Smart-seq2_Brain_Non-Myeloid	Tosches_lizard	Brain
Campbell	Tosches_lizard	Brain
Chen	Tosches_lizard	Brain
Tasic18	Tosches_turtle	Brain
Quake_Smart-seq2_Brain_Non-Myeloid	Tosches_turtle	Brain
Campbell	Tosches_turtle	Brain
Chen	Tosches_turtle	Brain
Tosches_lizard	Lake_2018	Brain
Tosches_lizard	Tasic18	Brain
Tosches_lizard	Quake_Smart-seq2_Brain_Non-Myeloid	Brain
Tosches_lizard	Campbell	Brain
Tosches_lizard	Chen	Brain
Tosches_lizard	Tosches_turtle	Brain
Tosches_turtle	Lake_2018	Brain
Tosches_turtle	Tasic18	Brain
Tosches_turtle	Quake_Smart-seq2_Brain_Non-Myeloid	Brain
Tosches_turtle	Campbell	Brain
Tosches_turtle	Chen	Brain
Tosches_turtle	Tosches_lizard	Brain
testis_human	testis_mouse	Testis
testis_human	testis_monkey	Testis
testis_mouse	testis_human	Testis
testis_mouse	testis_monkey	Testis
testis_monkey	testis_human	Testis
testis_monkey	testis_mouse	Testis
Menon_microfluidics	mouse_LD_P60	Retina
Menon_microfluidics	mouse_LD_24hr	Retina
Menon_microfluidics	mouse_LD_10hr	Retina
Menon_microfluidics	mouse_LD_4hr	Retina
Menon_microfluidics	mouse_LD_0hr	Retina
Menon_microfluidics	mouse_NMDA_P60	Retina
Menon_microfluidics	mouse_NMDA_72hr	Retina
Menon_microfluidics	mouse_NMDA_48hr	Retina
Menon_microfluidics	mouse_NMDA_36hr	Retina
Menon_microfluidics	mouse_NMDA_24hr	Retina
Menon_microfluidics	mouse_NMDA_12hr	Retina
Menon_microfluidics	mouse_NMDA_6hr	Retina
Menon_microfluidics	mouse_NMDA_3hr	Retina
Menon_microfluidics	Macosko	Retina
Menon_seqwell	mouse_LD_P60	Retina
Menon_seqwell	mouse_LD_24hr	Retina
Menon_seqwell	mouse_LD_10hr	Retina
Menon_seqwell	mouse_LD_4hr	Retina
Menon_seqwell	mouse_LD_0hr	Retina
Menon_seqwell	mouse_NMDA_P60	Retina
Menon_seqwell	mouse_NMDA_72hr	Retina
Menon_seqwell	mouse_NMDA_48hr	Retina
Menon_seqwell	mouse_NMDA_36hr	Retina
Menon_seqwell	mouse_NMDA_24hr	Retina
Menon_seqwell	mouse_NMDA_12hr	Retina
Menon_seqwell	mouse_NMDA_6hr	Retina
Menon_seqwell	mouse_NMDA_3hr	Retina
Menon_seqwell	Macosko	Retina
Menon_microfluidics	chick_P10	Retina
Menon_seqwell	chick_P10	Retina
Menon_microfluidics	zebrafish_TNFa_Adult	Retina
Menon_microfluidics	zebrafish_TNFa_72hr	Retina
Menon_microfluidics	zebrafish_TNFa_36hr	Retina
Menon_microfluidics	zebrafish_TNFa_20hr	Retina
Menon_microfluidics	zebrafish_TNFa_10hr	Retina
Menon_microfluidics	zebrafish_NMDA_Adult	Retina
Menon_microfluidics	zebrafish_NMDA_36hr	Retina
Menon_microfluidics	zebrafish_NMDA_20hr	Retina
Menon_microfluidics	zebrafish_NMDA_10hr	Retina
Menon_microfluidics	zebrafish_NMDA_4hr	Retina
Menon_microfluidics	zebrafish_LD_Adult	Retina
Menon_microfluidics	zebrafish_LD_36hr	Retina
Menon_microfluidics	zebrafish_LD_20hr	Retina
Menon_microfluidics	zebrafish_LD_10hr	Retina
Menon_microfluidics	zebrafish_LD_4hr	Retina
Menon_seqwell	zebrafish_TNFa_Adult	Retina
Menon_seqwell	zebrafish_TNFa_72hr	Retina
Menon_seqwell	zebrafish_TNFa_36hr	Retina
Menon_seqwell	zebrafish_TNFa_20hr	Retina
Menon_seqwell	zebrafish_TNFa_10hr	Retina
Menon_seqwell	zebrafish_NMDA_Adult	Retina
Menon_seqwell	zebrafish_NMDA_36hr	Retina
Menon_seqwell	zebrafish_NMDA_20hr	Retina
Menon_seqwell	zebrafish_NMDA_10hr	Retina
Menon_seqwell	zebrafish_NMDA_4hr	Retina
Menon_seqwell	zebrafish_LD_Adult	Retina
Menon_seqwell	zebrafish_LD_36hr	Retina
Menon_seqwell	zebrafish_LD_20hr	Retina
Menon_seqwell	zebrafish_LD_10hr	Retina
Menon_seqwell	zebrafish_LD_4hr	Retina
mouse_LD_P60	Menon_microfluidics	Retina
mouse_LD_P60	Menon_seqwell	Retina
mouse_LD_24hr	Menon_microfluidics	Retina
mouse_LD_24hr	Menon_seqwell	Retina
mouse_LD_10hr	Menon_microfluidics	Retina
mouse_LD_10hr	Menon_seqwell	Retina
mouse_LD_4hr	Menon_microfluidics	Retina
mouse_LD_4hr	Menon_seqwell	Retina
mouse_LD_0hr	Menon_microfluidics	Retina
mouse_LD_0hr	Menon_seqwell	Retina
mouse_NMDA_P60	Menon_microfluidics	Retina
mouse_NMDA_P60	Menon_seqwell	Retina
mouse_NMDA_72hr	Menon_microfluidics	Retina
mouse_NMDA_72hr	Menon_seqwell	Retina
mouse_NMDA_48hr	Menon_microfluidics	Retina
mouse_NMDA_48hr	Menon_seqwell	Retina
mouse_NMDA_36hr	Menon_microfluidics	Retina
mouse_NMDA_36hr	Menon_seqwell	Retina
mouse_NMDA_24hr	Menon_microfluidics	Retina
mouse_NMDA_24hr	Menon_seqwell	Retina
mouse_NMDA_12hr	Menon_microfluidics	Retina
mouse_NMDA_12hr	Menon_seqwell	Retina
mouse_NMDA_6hr	Menon_microfluidics	Retina
mouse_NMDA_6hr	Menon_seqwell	Retina
mouse_NMDA_3hr	Menon_microfluidics	Retina
mouse_NMDA_3hr	Menon_seqwell	Retina
Macosko	Menon_microfluidics	Retina
Macosko	Menon_seqwell	Retina
mouse_LD_P60	chick_P10	Retina
mouse_LD_24hr	chick_P10	Retina
mouse_LD_10hr	chick_P10	Retina
mouse_LD_4hr	chick_P10	Retina
mouse_LD_0hr	chick_P10	Retina
mouse_NMDA_P60	chick_P10	Retina
mouse_NMDA_72hr	chick_P10	Retina
mouse_NMDA_48hr	chick_P10	Retina
mouse_NMDA_36hr	chick_P10	Retina
mouse_NMDA_24hr	chick_P10	Retina
mouse_NMDA_12hr	chick_P10	Retina
mouse_NMDA_6hr	chick_P10	Retina
mouse_NMDA_3hr	chick_P10	Retina
Macosko	chick_P10	Retina
mouse_LD_P60	zebrafish_TNFa_Adult	Retina
mouse_LD_P60	zebrafish_TNFa_72hr	Retina
mouse_LD_P60	zebrafish_TNFa_36hr	Retina
mouse_LD_P60	zebrafish_TNFa_20hr	Retina
mouse_LD_P60	zebrafish_TNFa_10hr	Retina
mouse_LD_P60	zebrafish_NMDA_Adult	Retina
mouse_LD_P60	zebrafish_NMDA_36hr	Retina
mouse_LD_P60	zebrafish_NMDA_20hr	Retina
mouse_LD_P60	zebrafish_NMDA_10hr	Retina
mouse_LD_P60	zebrafish_NMDA_4hr	Retina
mouse_LD_P60	zebrafish_LD_Adult	Retina
mouse_LD_P60	zebrafish_LD_36hr	Retina
mouse_LD_P60	zebrafish_LD_20hr	Retina
mouse_LD_P60	zebrafish_LD_10hr	Retina
mouse_LD_P60	zebrafish_LD_4hr	Retina
mouse_LD_24hr	zebrafish_TNFa_Adult	Retina
mouse_LD_24hr	zebrafish_TNFa_72hr	Retina
mouse_LD_24hr	zebrafish_TNFa_36hr	Retina
mouse_LD_24hr	zebrafish_TNFa_20hr	Retina
mouse_LD_24hr	zebrafish_TNFa_10hr	Retina
mouse_LD_24hr	zebrafish_NMDA_Adult	Retina
mouse_LD_24hr	zebrafish_NMDA_36hr	Retina
mouse_LD_24hr	zebrafish_NMDA_20hr	Retina
mouse_LD_24hr	zebrafish_NMDA_10hr	Retina
mouse_LD_24hr	zebrafish_NMDA_4hr	Retina
mouse_LD_24hr	zebrafish_LD_Adult	Retina
mouse_LD_24hr	zebrafish_LD_36hr	Retina
mouse_LD_24hr	zebrafish_LD_20hr	Retina
mouse_LD_24hr	zebrafish_LD_10hr	Retina
mouse_LD_24hr	zebrafish_LD_4hr	Retina
mouse_LD_10hr	zebrafish_TNFa_Adult	Retina
mouse_LD_10hr	zebrafish_TNFa_72hr	Retina
mouse_LD_10hr	zebrafish_TNFa_36hr	Retina
mouse_LD_10hr	zebrafish_TNFa_20hr	Retina
mouse_LD_10hr	zebrafish_TNFa_10hr	Retina
mouse_LD_10hr	zebrafish_NMDA_Adult	Retina
mouse_LD_10hr	zebrafish_NMDA_36hr	Retina
mouse_LD_10hr	zebrafish_NMDA_20hr	Retina
mouse_LD_10hr	zebrafish_NMDA_10hr	Retina
mouse_LD_10hr	zebrafish_NMDA_4hr	Retina
mouse_LD_10hr	zebrafish_LD_Adult	Retina
mouse_LD_10hr	zebrafish_LD_36hr	Retina
mouse_LD_10hr	zebrafish_LD_20hr	Retina
mouse_LD_10hr	zebrafish_LD_10hr	Retina
mouse_LD_10hr	zebrafish_LD_4hr	Retina
mouse_LD_4hr	zebrafish_TNFa_Adult	Retina
mouse_LD_4hr	zebrafish_TNFa_72hr	Retina
mouse_LD_4hr	zebrafish_TNFa_36hr	Retina
mouse_LD_4hr	zebrafish_TNFa_20hr	Retina
mouse_LD_4hr	zebrafish_TNFa_10hr	Retina
mouse_LD_4hr	zebrafish_NMDA_Adult	Retina
mouse_LD_4hr	zebrafish_NMDA_36hr	Retina
mouse_LD_4hr	zebrafish_NMDA_20hr	Retina
mouse_LD_4hr	zebrafish_NMDA_10hr	Retina
mouse_LD_4hr	zebrafish_NMDA_4hr	Retina
mouse_LD_4hr	zebrafish_LD_Adult	Retina
mouse_LD_4hr	zebrafish_LD_36hr	Retina
mouse_LD_4hr	zebrafish_LD_20hr	Retina
mouse_LD_4hr	zebrafish_LD_10hr	Retina
mouse_LD_4hr	zebrafish_LD_4hr	Retina
mouse_LD_0hr	zebrafish_TNFa_Adult	Retina
mouse_LD_0hr	zebrafish_TNFa_72hr	Retina
mouse_LD_0hr	zebrafish_TNFa_36hr	Retina
mouse_LD_0hr	zebrafish_TNFa_20hr	Retina
mouse_LD_0hr	zebrafish_TNFa_10hr	Retina
mouse_LD_0hr	zebrafish_NMDA_Adult	Retina
mouse_LD_0hr	zebrafish_NMDA_36hr	Retina
mouse_LD_0hr	zebrafish_NMDA_20hr	Retina
mouse_LD_0hr	zebrafish_NMDA_10hr	Retina
mouse_LD_0hr	zebrafish_NMDA_4hr	Retina
mouse_LD_0hr	zebrafish_LD_Adult	Retina
mouse_LD_0hr	zebrafish_LD_36hr	Retina
mouse_LD_0hr	zebrafish_LD_20hr	Retina
mouse_LD_0hr	zebrafish_LD_10hr	Retina
mouse_LD_0hr	zebrafish_LD_4hr	Retina
mouse_NMDA_P60	zebrafish_TNFa_Adult	Retina
mouse_NMDA_P60	zebrafish_TNFa_72hr	Retina
mouse_NMDA_P60	zebrafish_TNFa_36hr	Retina
mouse_NMDA_P60	zebrafish_TNFa_20hr	Retina
mouse_NMDA_P60	zebrafish_TNFa_10hr	Retina
mouse_NMDA_P60	zebrafish_NMDA_Adult	Retina
mouse_NMDA_P60	zebrafish_NMDA_36hr	Retina
mouse_NMDA_P60	zebrafish_NMDA_20hr	Retina
mouse_NMDA_P60	zebrafish_NMDA_10hr	Retina
mouse_NMDA_P60	zebrafish_NMDA_4hr	Retina
mouse_NMDA_P60	zebrafish_LD_Adult	Retina
mouse_NMDA_P60	zebrafish_LD_36hr	Retina
mouse_NMDA_P60	zebrafish_LD_20hr	Retina
mouse_NMDA_P60	zebrafish_LD_10hr	Retina
mouse_NMDA_P60	zebrafish_LD_4hr	Retina
mouse_NMDA_72hr	zebrafish_TNFa_Adult	Retina
mouse_NMDA_72hr	zebrafish_TNFa_72hr	Retina
mouse_NMDA_72hr	zebrafish_TNFa_36hr	Retina
mouse_NMDA_72hr	zebrafish_TNFa_20hr	Retina
mouse_NMDA_72hr	zebrafish_TNFa_10hr	Retina
mouse_NMDA_72hr	zebrafish_NMDA_Adult	Retina
mouse_NMDA_72hr	zebrafish_NMDA_36hr	Retina
mouse_NMDA_72hr	zebrafish_NMDA_20hr	Retina
mouse_NMDA_72hr	zebrafish_NMDA_10hr	Retina
mouse_NMDA_72hr	zebrafish_NMDA_4hr	Retina
mouse_NMDA_72hr	zebrafish_LD_Adult	Retina
mouse_NMDA_72hr	zebrafish_LD_36hr	Retina
mouse_NMDA_72hr	zebrafish_LD_20hr	Retina
mouse_NMDA_72hr	zebrafish_LD_10hr	Retina
mouse_NMDA_72hr	zebrafish_LD_4hr	Retina
mouse_NMDA_48hr	zebrafish_TNFa_Adult	Retina
mouse_NMDA_48hr	zebrafish_TNFa_72hr	Retina
mouse_NMDA_48hr	zebrafish_TNFa_36hr	Retina
mouse_NMDA_48hr	zebrafish_TNFa_20hr	Retina
mouse_NMDA_48hr	zebrafish_TNFa_10hr	Retina
mouse_NMDA_48hr	zebrafish_NMDA_Adult	Retina
mouse_NMDA_48hr	zebrafish_NMDA_36hr	Retina
mouse_NMDA_48hr	zebrafish_NMDA_20hr	Retina
mouse_NMDA_48hr	zebrafish_NMDA_10hr	Retina
mouse_NMDA_48hr	zebrafish_NMDA_4hr	Retina
mouse_NMDA_48hr	zebrafish_LD_Adult	Retina
mouse_NMDA_48hr	zebrafish_LD_36hr	Retina
mouse_NMDA_48hr	zebrafish_LD_20hr	Retina
mouse_NMDA_48hr	zebrafish_LD_10hr	Retina
mouse_NMDA_48hr	zebrafish_LD_4hr	Retina
mouse_NMDA_36hr	zebrafish_TNFa_Adult	Retina
mouse_NMDA_36hr	zebrafish_TNFa_72hr	Retina
mouse_NMDA_36hr	zebrafish_TNFa_36hr	Retina
mouse_NMDA_36hr	zebrafish_TNFa_20hr	Retina
mouse_NMDA_36hr	zebrafish_TNFa_10hr	Retina
mouse_NMDA_36hr	zebrafish_NMDA_Adult	Retina
mouse_NMDA_36hr	zebrafish_NMDA_36hr	Retina
mouse_NMDA_36hr	zebrafish_NMDA_20hr	Retina
mouse_NMDA_36hr	zebrafish_NMDA_10hr	Retina
mouse_NMDA_36hr	zebrafish_NMDA_4hr	Retina
mouse_NMDA_36hr	zebrafish_LD_Adult	Retina
mouse_NMDA_36hr	zebrafish_LD_36hr	Retina
mouse_NMDA_36hr	zebrafish_LD_20hr	Retina
mouse_NMDA_36hr	zebrafish_LD_10hr	Retina
mouse_NMDA_36hr	zebrafish_LD_4hr	Retina
mouse_NMDA_24hr	zebrafish_TNFa_Adult	Retina
mouse_NMDA_24hr	zebrafish_TNFa_72hr	Retina
mouse_NMDA_24hr	zebrafish_TNFa_36hr	Retina
mouse_NMDA_24hr	zebrafish_TNFa_20hr	Retina
mouse_NMDA_24hr	zebrafish_TNFa_10hr	Retina
mouse_NMDA_24hr	zebrafish_NMDA_Adult	Retina
mouse_NMDA_24hr	zebrafish_NMDA_36hr	Retina
mouse_NMDA_24hr	zebrafish_NMDA_20hr	Retina
mouse_NMDA_24hr	zebrafish_NMDA_10hr	Retina
mouse_NMDA_24hr	zebrafish_NMDA_4hr	Retina
mouse_NMDA_24hr	zebrafish_LD_Adult	Retina
mouse_NMDA_24hr	zebrafish_LD_36hr	Retina
mouse_NMDA_24hr	zebrafish_LD_20hr	Retina
mouse_NMDA_24hr	zebrafish_LD_10hr	Retina
mouse_NMDA_24hr	zebrafish_LD_4hr	Retina
mouse_NMDA_12hr	zebrafish_TNFa_Adult	Retina
mouse_NMDA_12hr	zebrafish_TNFa_72hr	Retina
mouse_NMDA_12hr	zebrafish_TNFa_36hr	Retina
mouse_NMDA_12hr	zebrafish_TNFa_20hr	Retina
mouse_NMDA_12hr	zebrafish_TNFa_10hr	Retina
mouse_NMDA_12hr	zebrafish_NMDA_Adult	Retina
mouse_NMDA_12hr	zebrafish_NMDA_36hr	Retina
mouse_NMDA_12hr	zebrafish_NMDA_20hr	Retina
mouse_NMDA_12hr	zebrafish_NMDA_10hr	Retina
mouse_NMDA_12hr	zebrafish_NMDA_4hr	Retina
mouse_NMDA_12hr	zebrafish_LD_Adult	Retina
mouse_NMDA_12hr	zebrafish_LD_36hr	Retina
mouse_NMDA_12hr	zebrafish_LD_20hr	Retina
mouse_NMDA_12hr	zebrafish_LD_10hr	Retina
mouse_NMDA_12hr	zebrafish_LD_4hr	Retina
mouse_NMDA_6hr	zebrafish_TNFa_Adult	Retina
mouse_NMDA_6hr	zebrafish_TNFa_72hr	Retina
mouse_NMDA_6hr	zebrafish_TNFa_36hr	Retina
mouse_NMDA_6hr	zebrafish_TNFa_20hr	Retina
mouse_NMDA_6hr	zebrafish_TNFa_10hr	Retina
mouse_NMDA_6hr	zebrafish_NMDA_Adult	Retina
mouse_NMDA_6hr	zebrafish_NMDA_36hr	Retina
mouse_NMDA_6hr	zebrafish_NMDA_20hr	Retina
mouse_NMDA_6hr	zebrafish_NMDA_10hr	Retina
mouse_NMDA_6hr	zebrafish_NMDA_4hr	Retina
mouse_NMDA_6hr	zebrafish_LD_Adult	Retina
mouse_NMDA_6hr	zebrafish_LD_36hr	Retina
mouse_NMDA_6hr	zebrafish_LD_20hr	Retina
mouse_NMDA_6hr	zebrafish_LD_10hr	Retina
mouse_NMDA_6hr	zebrafish_LD_4hr	Retina
mouse_NMDA_3hr	zebrafish_TNFa_Adult	Retina
mouse_NMDA_3hr	zebrafish_TNFa_72hr	Retina
mouse_NMDA_3hr	zebrafish_TNFa_36hr	Retina
mouse_NMDA_3hr	zebrafish_TNFa_20hr	Retina
mouse_NMDA_3hr	zebrafish_TNFa_10hr	Retina
mouse_NMDA_3hr	zebrafish_NMDA_Adult	Retina
mouse_NMDA_3hr	zebrafish_NMDA_36hr	Retina
mouse_NMDA_3hr	zebrafish_NMDA_20hr	Retina
mouse_NMDA_3hr	zebrafish_NMDA_10hr	Retina
mouse_NMDA_3hr	zebrafish_NMDA_4hr	Retina
mouse_NMDA_3hr	zebrafish_LD_Adult	Retina
mouse_NMDA_3hr	zebrafish_LD_36hr	Retina
mouse_NMDA_3hr	zebrafish_LD_20hr	Retina
mouse_NMDA_3hr	zebrafish_LD_10hr	Retina
mouse_NMDA_3hr	zebrafish_LD_4hr	Retina
Macosko	zebrafish_TNFa_Adult	Retina
Macosko	zebrafish_TNFa_72hr	Retina
Macosko	zebrafish_TNFa_36hr	Retina
Macosko	zebrafish_TNFa_20hr	Retina
Macosko	zebrafish_TNFa_10hr	Retina
Macosko	zebrafish_NMDA_Adult	Retina
Macosko	zebrafish_NMDA_36hr	Retina
Macosko	zebrafish_NMDA_20hr	Retina
Macosko	zebrafish_NMDA_10hr	Retina
Macosko	zebrafish_NMDA_4hr	Retina
Macosko	zebrafish_LD_Adult	Retina
Macosko	zebrafish_LD_36hr	Retina
Macosko	zebrafish_LD_20hr	Retina
Macosko	zebrafish_LD_10hr	Retina
Macosko	zebrafish_LD_4hr	Retina
chick_P10	Menon_microfluidics	Retina
chick_P10	Menon_seqwell	Retina
chick_P10	mouse_LD_P60	Retina
chick_P10	mouse_LD_24hr	Retina
chick_P10	mouse_LD_10hr	Retina
chick_P10	mouse_LD_4hr	Retina
chick_P10	mouse_LD_0hr	Retina
chick_P10	mouse_NMDA_P60	Retina
chick_P10	mouse_NMDA_72hr	Retina
chick_P10	mouse_NMDA_48hr	Retina
chick_P10	mouse_NMDA_36hr	Retina
chick_P10	mouse_NMDA_24hr	Retina
chick_P10	mouse_NMDA_12hr	Retina
chick_P10	mouse_NMDA_6hr	Retina
chick_P10	mouse_NMDA_3hr	Retina
chick_P10	Macosko	Retina
chick_P10	zebrafish_TNFa_Adult	Retina
chick_P10	zebrafish_TNFa_72hr	Retina
chick_P10	zebrafish_TNFa_36hr	Retina
chick_P10	zebrafish_TNFa_20hr	Retina
chick_P10	zebrafish_TNFa_10hr	Retina
chick_P10	zebrafish_NMDA_Adult	Retina
chick_P10	zebrafish_NMDA_36hr	Retina
chick_P10	zebrafish_NMDA_20hr	Retina
chick_P10	zebrafish_NMDA_10hr	Retina
chick_P10	zebrafish_NMDA_4hr	Retina
chick_P10	zebrafish_LD_Adult	Retina
chick_P10	zebrafish_LD_36hr	Retina
chick_P10	zebrafish_LD_20hr	Retina
chick_P10	zebrafish_LD_10hr	Retina
chick_P10	zebrafish_LD_4hr	Retina
zebrafish_TNFa_Adult	Menon_microfluidics	Retina
zebrafish_TNFa_Adult	Menon_seqwell	Retina
zebrafish_TNFa_72hr	Menon_microfluidics	Retina
zebrafish_TNFa_72hr	Menon_seqwell	Retina
zebrafish_TNFa_36hr	Menon_microfluidics	Retina
zebrafish_TNFa_36hr	Menon_seqwell	Retina
zebrafish_TNFa_20hr	Menon_microfluidics	Retina
zebrafish_TNFa_20hr	Menon_seqwell	Retina
zebrafish_TNFa_10hr	Menon_microfluidics	Retina
zebrafish_TNFa_10hr	Menon_seqwell	Retina
zebrafish_NMDA_Adult	Menon_microfluidics	Retina
zebrafish_NMDA_Adult	Menon_seqwell	Retina
zebrafish_NMDA_36hr	Menon_microfluidics	Retina
zebrafish_NMDA_36hr	Menon_seqwell	Retina
zebrafish_NMDA_20hr	Menon_microfluidics	Retina
zebrafish_NMDA_20hr	Menon_seqwell	Retina
zebrafish_NMDA_10hr	Menon_microfluidics	Retina
zebrafish_NMDA_10hr	Menon_seqwell	Retina
zebrafish_NMDA_4hr	Menon_microfluidics	Retina
zebrafish_NMDA_4hr	Menon_seqwell	Retina
zebrafish_LD_Adult	Menon_microfluidics	Retina
zebrafish_LD_Adult	Menon_seqwell	Retina
zebrafish_LD_36hr	Menon_microfluidics	Retina
zebrafish_LD_36hr	Menon_seqwell	Retina
zebrafish_LD_20hr	Menon_microfluidics	Retina
zebrafish_LD_20hr	Menon_seqwell	Retina
zebrafish_LD_10hr	Menon_microfluidics	Retina
zebrafish_LD_10hr	Menon_seqwell	Retina
zebrafish_LD_4hr	Menon_microfluidics	Retina
zebrafish_LD_4hr	Menon_seqwell	Retina
zebrafish_TNFa_Adult	mouse_LD_P60	Retina
zebrafish_TNFa_Adult	mouse_LD_24hr	Retina
zebrafish_TNFa_Adult	mouse_LD_10hr	Retina
zebrafish_TNFa_Adult	mouse_LD_4hr	Retina
zebrafish_TNFa_Adult	mouse_LD_0hr	Retina
zebrafish_TNFa_Adult	mouse_NMDA_P60	Retina
zebrafish_TNFa_Adult	mouse_NMDA_72hr	Retina
zebrafish_TNFa_Adult	mouse_NMDA_48hr	Retina
zebrafish_TNFa_Adult	mouse_NMDA_36hr	Retina
zebrafish_TNFa_Adult	mouse_NMDA_24hr	Retina
zebrafish_TNFa_Adult	mouse_NMDA_12hr	Retina
zebrafish_TNFa_Adult	mouse_NMDA_6hr	Retina
zebrafish_TNFa_Adult	mouse_NMDA_3hr	Retina
zebrafish_TNFa_Adult	Macosko	Retina
zebrafish_TNFa_72hr	mouse_LD_P60	Retina
zebrafish_TNFa_72hr	mouse_LD_24hr	Retina
zebrafish_TNFa_72hr	mouse_LD_10hr	Retina
zebrafish_TNFa_72hr	mouse_LD_4hr	Retina
zebrafish_TNFa_72hr	mouse_LD_0hr	Retina
zebrafish_TNFa_72hr	mouse_NMDA_P60	Retina
zebrafish_TNFa_72hr	mouse_NMDA_72hr	Retina
zebrafish_TNFa_72hr	mouse_NMDA_48hr	Retina
zebrafish_TNFa_72hr	mouse_NMDA_36hr	Retina
zebrafish_TNFa_72hr	mouse_NMDA_24hr	Retina
zebrafish_TNFa_72hr	mouse_NMDA_12hr	Retina
zebrafish_TNFa_72hr	mouse_NMDA_6hr	Retina
zebrafish_TNFa_72hr	mouse_NMDA_3hr	Retina
zebrafish_TNFa_72hr	Macosko	Retina
zebrafish_TNFa_36hr	mouse_LD_P60	Retina
zebrafish_TNFa_36hr	mouse_LD_24hr	Retina
zebrafish_TNFa_36hr	mouse_LD_10hr	Retina
zebrafish_TNFa_36hr	mouse_LD_4hr	Retina
zebrafish_TNFa_36hr	mouse_LD_0hr	Retina
zebrafish_TNFa_36hr	mouse_NMDA_P60	Retina
zebrafish_TNFa_36hr	mouse_NMDA_72hr	Retina
zebrafish_TNFa_36hr	mouse_NMDA_48hr	Retina
zebrafish_TNFa_36hr	mouse_NMDA_36hr	Retina
zebrafish_TNFa_36hr	mouse_NMDA_24hr	Retina
zebrafish_TNFa_36hr	mouse_NMDA_12hr	Retina
zebrafish_TNFa_36hr	mouse_NMDA_6hr	Retina
zebrafish_TNFa_36hr	mouse_NMDA_3hr	Retina
zebrafish_TNFa_36hr	Macosko	Retina
zebrafish_TNFa_20hr	mouse_LD_P60	Retina
zebrafish_TNFa_20hr	mouse_LD_24hr	Retina
zebrafish_TNFa_20hr	mouse_LD_10hr	Retina
zebrafish_TNFa_20hr	mouse_LD_4hr	Retina
zebrafish_TNFa_20hr	mouse_LD_0hr	Retina
zebrafish_TNFa_20hr	mouse_NMDA_P60	Retina
zebrafish_TNFa_20hr	mouse_NMDA_72hr	Retina
zebrafish_TNFa_20hr	mouse_NMDA_48hr	Retina
zebrafish_TNFa_20hr	mouse_NMDA_36hr	Retina
zebrafish_TNFa_20hr	mouse_NMDA_24hr	Retina
zebrafish_TNFa_20hr	mouse_NMDA_12hr	Retina
zebrafish_TNFa_20hr	mouse_NMDA_6hr	Retina
zebrafish_TNFa_20hr	mouse_NMDA_3hr	Retina
zebrafish_TNFa_20hr	Macosko	Retina
zebrafish_TNFa_10hr	mouse_LD_P60	Retina
zebrafish_TNFa_10hr	mouse_LD_24hr	Retina
zebrafish_TNFa_10hr	mouse_LD_10hr	Retina
zebrafish_TNFa_10hr	mouse_LD_4hr	Retina
zebrafish_TNFa_10hr	mouse_LD_0hr	Retina
zebrafish_TNFa_10hr	mouse_NMDA_P60	Retina
zebrafish_TNFa_10hr	mouse_NMDA_72hr	Retina
zebrafish_TNFa_10hr	mouse_NMDA_48hr	Retina
zebrafish_TNFa_10hr	mouse_NMDA_36hr	Retina
zebrafish_TNFa_10hr	mouse_NMDA_24hr	Retina
zebrafish_TNFa_10hr	mouse_NMDA_12hr	Retina
zebrafish_TNFa_10hr	mouse_NMDA_6hr	Retina
zebrafish_TNFa_10hr	mouse_NMDA_3hr	Retina
zebrafish_TNFa_10hr	Macosko	Retina
zebrafish_NMDA_Adult	mouse_LD_P60	Retina
zebrafish_NMDA_Adult	mouse_LD_24hr	Retina
zebrafish_NMDA_Adult	mouse_LD_10hr	Retina
zebrafish_NMDA_Adult	mouse_LD_4hr	Retina
zebrafish_NMDA_Adult	mouse_LD_0hr	Retina
zebrafish_NMDA_Adult	mouse_NMDA_P60	Retina
zebrafish_NMDA_Adult	mouse_NMDA_72hr	Retina
zebrafish_NMDA_Adult	mouse_NMDA_48hr	Retina
zebrafish_NMDA_Adult	mouse_NMDA_36hr	Retina
zebrafish_NMDA_Adult	mouse_NMDA_24hr	Retina
zebrafish_NMDA_Adult	mouse_NMDA_12hr	Retina
zebrafish_NMDA_Adult	mouse_NMDA_6hr	Retina
zebrafish_NMDA_Adult	mouse_NMDA_3hr	Retina
zebrafish_NMDA_Adult	Macosko	Retina
zebrafish_NMDA_36hr	mouse_LD_P60	Retina
zebrafish_NMDA_36hr	mouse_LD_24hr	Retina
zebrafish_NMDA_36hr	mouse_LD_10hr	Retina
zebrafish_NMDA_36hr	mouse_LD_4hr	Retina
zebrafish_NMDA_36hr	mouse_LD_0hr	Retina
zebrafish_NMDA_36hr	mouse_NMDA_P60	Retina
zebrafish_NMDA_36hr	mouse_NMDA_72hr	Retina
zebrafish_NMDA_36hr	mouse_NMDA_48hr	Retina
zebrafish_NMDA_36hr	mouse_NMDA_36hr	Retina
zebrafish_NMDA_36hr	mouse_NMDA_24hr	Retina
zebrafish_NMDA_36hr	mouse_NMDA_12hr	Retina
zebrafish_NMDA_36hr	mouse_NMDA_6hr	Retina
zebrafish_NMDA_36hr	mouse_NMDA_3hr	Retina
zebrafish_NMDA_36hr	Macosko	Retina
zebrafish_NMDA_20hr	mouse_LD_P60	Retina
zebrafish_NMDA_20hr	mouse_LD_24hr	Retina
zebrafish_NMDA_20hr	mouse_LD_10hr	Retina
zebrafish_NMDA_20hr	mouse_LD_4hr	Retina
zebrafish_NMDA_20hr	mouse_LD_0hr	Retina
zebrafish_NMDA_20hr	mouse_NMDA_P60	Retina
zebrafish_NMDA_20hr	mouse_NMDA_72hr	Retina
zebrafish_NMDA_20hr	mouse_NMDA_48hr	Retina
zebrafish_NMDA_20hr	mouse_NMDA_36hr	Retina
zebrafish_NMDA_20hr	mouse_NMDA_24hr	Retina
zebrafish_NMDA_20hr	mouse_NMDA_12hr	Retina
zebrafish_NMDA_20hr	mouse_NMDA_6hr	Retina
zebrafish_NMDA_20hr	mouse_NMDA_3hr	Retina
zebrafish_NMDA_20hr	Macosko	Retina
zebrafish_NMDA_10hr	mouse_LD_P60	Retina
zebrafish_NMDA_10hr	mouse_LD_24hr	Retina
zebrafish_NMDA_10hr	mouse_LD_10hr	Retina
zebrafish_NMDA_10hr	mouse_LD_4hr	Retina
zebrafish_NMDA_10hr	mouse_LD_0hr	Retina
zebrafish_NMDA_10hr	mouse_NMDA_P60	Retina
zebrafish_NMDA_10hr	mouse_NMDA_72hr	Retina
zebrafish_NMDA_10hr	mouse_NMDA_48hr	Retina
zebrafish_NMDA_10hr	mouse_NMDA_36hr	Retina
zebrafish_NMDA_10hr	mouse_NMDA_24hr	Retina
zebrafish_NMDA_10hr	mouse_NMDA_12hr	Retina
zebrafish_NMDA_10hr	mouse_NMDA_6hr	Retina
zebrafish_NMDA_10hr	mouse_NMDA_3hr	Retina
zebrafish_NMDA_10hr	Macosko	Retina
zebrafish_NMDA_4hr	mouse_LD_P60	Retina
zebrafish_NMDA_4hr	mouse_LD_24hr	Retina
zebrafish_NMDA_4hr	mouse_LD_10hr	Retina
zebrafish_NMDA_4hr	mouse_LD_4hr	Retina
zebrafish_NMDA_4hr	mouse_LD_0hr	Retina
zebrafish_NMDA_4hr	mouse_NMDA_P60	Retina
zebrafish_NMDA_4hr	mouse_NMDA_72hr	Retina
zebrafish_NMDA_4hr	mouse_NMDA_48hr	Retina
zebrafish_NMDA_4hr	mouse_NMDA_36hr	Retina
zebrafish_NMDA_4hr	mouse_NMDA_24hr	Retina
zebrafish_NMDA_4hr	mouse_NMDA_12hr	Retina
zebrafish_NMDA_4hr	mouse_NMDA_6hr	Retina
zebrafish_NMDA_4hr	mouse_NMDA_3hr	Retina
zebrafish_NMDA_4hr	Macosko	Retina
zebrafish_LD_Adult	mouse_LD_P60	Retina
zebrafish_LD_Adult	mouse_LD_24hr	Retina
zebrafish_LD_Adult	mouse_LD_10hr	Retina
zebrafish_LD_Adult	mouse_LD_4hr	Retina
zebrafish_LD_Adult	mouse_LD_0hr	Retina
zebrafish_LD_Adult	mouse_NMDA_P60	Retina
zebrafish_LD_Adult	mouse_NMDA_72hr	Retina
zebrafish_LD_Adult	mouse_NMDA_48hr	Retina
zebrafish_LD_Adult	mouse_NMDA_36hr	Retina
zebrafish_LD_Adult	mouse_NMDA_24hr	Retina
zebrafish_LD_Adult	mouse_NMDA_12hr	Retina
zebrafish_LD_Adult	mouse_NMDA_6hr	Retina
zebrafish_LD_Adult	mouse_NMDA_3hr	Retina
zebrafish_LD_Adult	Macosko	Retina
zebrafish_LD_36hr	mouse_LD_P60	Retina
zebrafish_LD_36hr	mouse_LD_24hr	Retina
zebrafish_LD_36hr	mouse_LD_10hr	Retina
zebrafish_LD_36hr	mouse_LD_4hr	Retina
zebrafish_LD_36hr	mouse_LD_0hr	Retina
zebrafish_LD_36hr	mouse_NMDA_P60	Retina
zebrafish_LD_36hr	mouse_NMDA_72hr	Retina
zebrafish_LD_36hr	mouse_NMDA_48hr	Retina
zebrafish_LD_36hr	mouse_NMDA_36hr	Retina
zebrafish_LD_36hr	mouse_NMDA_24hr	Retina
zebrafish_LD_36hr	mouse_NMDA_12hr	Retina
zebrafish_LD_36hr	mouse_NMDA_6hr	Retina
zebrafish_LD_36hr	mouse_NMDA_3hr	Retina
zebrafish_LD_36hr	Macosko	Retina
zebrafish_LD_20hr	mouse_LD_P60	Retina
zebrafish_LD_20hr	mouse_LD_24hr	Retina
zebrafish_LD_20hr	mouse_LD_10hr	Retina
zebrafish_LD_20hr	mouse_LD_4hr	Retina
zebrafish_LD_20hr	mouse_LD_0hr	Retina
zebrafish_LD_20hr	mouse_NMDA_P60	Retina
zebrafish_LD_20hr	mouse_NMDA_72hr	Retina
zebrafish_LD_20hr	mouse_NMDA_48hr	Retina
zebrafish_LD_20hr	mouse_NMDA_36hr	Retina
zebrafish_LD_20hr	mouse_NMDA_24hr	Retina
zebrafish_LD_20hr	mouse_NMDA_12hr	Retina
zebrafish_LD_20hr	mouse_NMDA_6hr	Retina
zebrafish_LD_20hr	mouse_NMDA_3hr	Retina
zebrafish_LD_20hr	Macosko	Retina
zebrafish_LD_10hr	mouse_LD_P60	Retina
zebrafish_LD_10hr	mouse_LD_24hr	Retina
zebrafish_LD_10hr	mouse_LD_10hr	Retina
zebrafish_LD_10hr	mouse_LD_4hr	Retina
zebrafish_LD_10hr	mouse_LD_0hr	Retina
zebrafish_LD_10hr	mouse_NMDA_P60	Retina
zebrafish_LD_10hr	mouse_NMDA_72hr	Retina
zebrafish_LD_10hr	mouse_NMDA_48hr	Retina
zebrafish_LD_10hr	mouse_NMDA_36hr	Retina
zebrafish_LD_10hr	mouse_NMDA_24hr	Retina
zebrafish_LD_10hr	mouse_NMDA_12hr	Retina
zebrafish_LD_10hr	mouse_NMDA_6hr	Retina
zebrafish_LD_10hr	mouse_NMDA_3hr	Retina
zebrafish_LD_10hr	Macosko	Retina
zebrafish_LD_4hr	mouse_LD_P60	Retina
zebrafish_LD_4hr	mouse_LD_24hr	Retina
zebrafish_LD_4hr	mouse_LD_10hr	Retina
zebrafish_LD_4hr	mouse_LD_4hr	Retina
zebrafish_LD_4hr	mouse_LD_0hr	Retina
zebrafish_LD_4hr	mouse_NMDA_P60	Retina
zebrafish_LD_4hr	mouse_NMDA_72hr	Retina
zebrafish_LD_4hr	mouse_NMDA_48hr	Retina
zebrafish_LD_4hr	mouse_NMDA_36hr	Retina
zebrafish_LD_4hr	mouse_NMDA_24hr	Retina
zebrafish_LD_4hr	mouse_NMDA_12hr	Retina
zebrafish_LD_4hr	mouse_NMDA_6hr	Retina
zebrafish_LD_4hr	mouse_NMDA_3hr	Retina
zebrafish_LD_4hr	Macosko	Retina
zebrafish_TNFa_Adult	chick_P10	Retina
zebrafish_TNFa_72hr	chick_P10	Retina
zebrafish_TNFa_36hr	chick_P10	Retina
zebrafish_TNFa_20hr	chick_P10	Retina
zebrafish_TNFa_10hr	chick_P10	Retina
zebrafish_NMDA_Adult	chick_P10	Retina
zebrafish_NMDA_36hr	chick_P10	Retina
zebrafish_NMDA_20hr	chick_P10	Retina
zebrafish_NMDA_10hr	chick_P10	Retina
zebrafish_NMDA_4hr	chick_P10	Retina
zebrafish_LD_Adult	chick_P10	Retina
zebrafish_LD_36hr	chick_P10	Retina
zebrafish_LD_20hr	chick_P10	Retina
zebrafish_LD_10hr	chick_P10	Retina
zebrafish_LD_4hr	chick_P10	Retina
panc8	FACS	Pancreas
panc8	Baron_mouse	Pancreas
Baron_human	FACS	Pancreas
Baron_human	Baron_mouse	Pancreas
FACS	Baron_human	Pancreas
Baron_mouse	Baron_human	Pancreas
Wang_Kidney	Quake_10x_Kidney	Kidney
Wang_Kidney	Adam	Kidney
Wang_Kidney	Park	Kidney
Wang_Kidney	Karaiskos_mouse	Kidney
Young	Quake_10x_Kidney	Kidney
Young	Adam	Kidney
Young	Park	Kidney
Young	Karaiskos_mouse	Kidney
Wu_human	Quake_10x_Kidney	Kidney
Wu_human	Adam	Kidney
Wu_human	Park	Kidney
Wu_human	Karaiskos_mouse	Kidney
Hochane	Quake_10x_Kidney	Kidney
Hochane	Adam	Kidney
Hochane	Park	Kidney
Hochane	Karaiskos_mouse	Kidney
Quake_10x_Kidney	Wang_Kidney	Kidney
Quake_10x_Kidney	Young	Kidney
Quake_10x_Kidney	Wu_human	Kidney
Quake_10x_Kidney	Hochane	Kidney
Adam	Wang_Kidney	Kidney
Adam	Young	Kidney
Adam	Wu_human	Kidney
Adam	Hochane	Kidney
Park	Wang_Kidney	Kidney
Park	Young	Kidney
Park	Wu_human	Kidney
Park	Hochane	Kidney
Karaiskos_mouse	Wang_Kidney	Kidney
Karaiskos_mouse	Young	Kidney
Karaiskos_mouse	Wu_human	Kidney
Karaiskos_mouse	Hochane	Kidney

## Sheet: Sheet2
Supplemental Table 1b. Data sources for cross-species data pairs.
Datasets	Source
Lake_2018	GSE97942
Tasic18	GSE115746
Quake_Smart-seq2_Brain_Non-Myeloid	https://figshare.com/articles/dataset/Single-cell_RNA-seq_data_from_Smart-seq2_sequencing_of_FACS_sorted_cells_v2_/5829687/7
Campbell	GSE93374
Chen	GSE87544
Tosches_lizard	https://brain.mpg.de/research/laurent-department/software-techniques.html
Tosches_turtle	https://brain.mpg.de/research/laurent-department/software-techniques.html
testis_human	GSE142585
testis_mouse	GSE112393
testis_monkey	GSE142585
Menon_microfluidics	GSE137847
Menon_seqwell	GSE137847
mouse_LD_P60	https://github.com/jiewwwang/Single-cell-retinal-regeneration
mouse_LD_24hr	https://github.com/jiewwwang/Single-cell-retinal-regeneration
mouse_LD_10hr	https://github.com/jiewwwang/Single-cell-retinal-regeneration
mouse_LD_4hr	https://github.com/jiewwwang/Single-cell-retinal-regeneration
mouse_LD_0hr	https://github.com/jiewwwang/Single-cell-retinal-regeneration
mouse_NMDA_P60	https://github.com/jiewwwang/Single-cell-retinal-regeneration
mouse_NMDA_72hr	https://github.com/jiewwwang/Single-cell-retinal-regeneration
mouse_NMDA_48hr	https://github.com/jiewwwang/Single-cell-retinal-regeneration
mouse_NMDA_36hr	https://github.com/jiewwwang/Single-cell-retinal-regeneration
mouse_NMDA_24hr	https://github.com/jiewwwang/Single-cell-retinal-regeneration
mouse_NMDA_12hr	https://github.com/jiewwwang/Single-cell-retinal-regeneration
mouse_NMDA_6hr	https://github.com/jiewwwang/Single-cell-retinal-regeneration
mouse_NMDA_3hr	https://github.com/jiewwwang/Single-cell-retinal-regeneration
Macosko	GSE63473
chick_P10	https://github.com/jiewwwang/Single-cell-retinal-regeneration
zebrafish_TNFa_Adult	https://github.com/jiewwwang/Single-cell-retinal-regeneration
zebrafish_TNFa_72hr	https://github.com/jiewwwang/Single-cell-retinal-regeneration
zebrafish_TNFa_36hr	https://github.com/jiewwwang/Single-cell-retinal-regeneration
zebrafish_TNFa_20hr	https://github.com/jiewwwang/Single-cell-retinal-regeneration
zebrafish_TNFa_10hr	https://github.com/jiewwwang/Single-cell-retinal-regeneration
zebrafish_NMDA_Adult	https://github.com/jiewwwang/Single-cell-retinal-regeneration
zebrafish_NMDA_36hr	https://github.com/jiewwwang/Single-cell-retinal-regeneration
zebrafish_NMDA_20hr	https://github.com/jiewwwang/Single-cell-retinal-regeneration
zebrafish_NMDA_10hr	https://github.com/jiewwwang/Single-cell-retinal-regeneration
zebrafish_NMDA_4hr	https://github.com/jiewwwang/Single-cell-retinal-regeneration
zebrafish_LD_Adult	https://github.com/jiewwwang/Single-cell-retinal-regeneration
zebrafish_LD_36hr	https://github.com/jiewwwang/Single-cell-retinal-regeneration
zebrafish_LD_20hr	https://github.com/jiewwwang/Single-cell-retinal-regeneration
zebrafish_LD_10hr	https://github.com/jiewwwang/Single-cell-retinal-regeneration
zebrafish_LD_4hr	https://github.com/jiewwwang/Single-cell-retinal-regeneration
panc8	https://satijalab.org/seurat/articles/integration_mapping
Baron_human	GSE84133
FACS	https://figshare.com/articles/dataset/Single-cell_RNA-seq_data_from_Smart-seq2_sequencing_of_FACS_sorted_cells_v2_/5829687/7
Baron_mouse	GSE84133
Wang_Kidney	GSE109488
Young	EGAS00001002171, EGAS00001002486, EGAS00001002325, and EGAS00001002553 in European Genome-phenome Archive.
Wu_human	GSE118184
Hochane	GSE114530
Quake_10x_Kidney	https://figshare.com/articles/dataset/Single-cell_RNA-seq_data_from_microfluidic_emulsion_v2_/5968960/2
Adam	GSE94333
Park	GSE107585
Karaiskos_mouse	GSE111107
