# Supplementary material for: Highly accurate reference and method selection for universal cross–data set cell type annotation with CAMUS
Source: HighWire-hosted journal article supplement (doi:10.1101/gr.280821.125), 2025-10-01
Supplement: Supplemental_Table_S2.xlsx [file Supplemental_Table_S2.xlsx]

## Sheet: CAME
Supplemental Table 2a. Annotation metrics and CAMUS scores for CAME on cross-species data pairs.
CAME_f1_macro	CAME_f1_weight	CAME_ACC	CAMUS_score	tissue	reference	query
0.411271	0.977814	0.977705	0.482083	brain	Lake_2018	Tasic18
0.592115	0.873716	0.884446	0.815447	brain	Lake_2018	Quake_Smart-seq2_Brain_Non-Myeloid
0.292117	0.545782	0.473735	0.569843	brain	Lake_2018	Campbell
0.465539	0.842434	0.822897	0.788816	brain	Lake_2018	Chen
0.678533	0.916256	0.908049	0.77698	brain	Lake_2018	Tosches_lizard
0.751382	0.968317	0.948082	0.716578	brain	Lake_2018	Tosches_turtle
0.315119	0.838498	0.765479	0.542338	brain	Tasic18	Lake_2018
0.371301	0.497941	0.407492	0.476854	brain	Quake_Smart-seq2_Brain_Non-Myeloid	Lake_2018
0.355628	0.808304	0.754314	0.489568	brain	Campbell	Lake_2018
0.474671	0.852113	0.803877	0.56939	brain	Chen	Lake_2018
0.337577	0.800623	0.750657	0.713462	brain	Tasic18	Tosches_lizard
0.401103	0.851785	0.79293	0.679595	brain	Quake_Smart-seq2_Brain_Non-Myeloid	Tosches_lizard
0.356856	0.760225	0.759494	0.709105	brain	Campbell	Tosches_lizard
0.576159	0.932884	0.909482	0.765694	brain	Chen	Tosches_lizard
0.275428	0.837474	0.812473	0.710362	brain	Tasic18	Tosches_turtle
0.371658	0.886069	0.86482	0.649987	brain	Quake_Smart-seq2_Brain_Non-Myeloid	Tosches_turtle
0.350478	0.870209	0.840334	0.617602	brain	Campbell	Tosches_turtle
0.457022	0.951115	0.932598	0.700959	brain	Chen	Tosches_turtle
0.47427	0.845966	0.797557	0.54052	brain	Tosches_lizard	Lake_2018
0.401281	0.977206	0.978339	0.482073	brain	Tosches_lizard	Tasic18
0.442408	0.857104	0.857395	0.789321	brain	Tosches_lizard	Quake_Smart-seq2_Brain_Non-Myeloid
0.304325	0.623475	0.516276	0.533033	brain	Tosches_lizard	Campbell
0.396137	0.839169	0.797006	0.801197	brain	Tosches_lizard	Chen
0.927016	0.978955	0.978193	0.747321	brain	Tosches_lizard	Tosches_turtle
0.464876	0.852054	0.813455	0.596314	brain	Tosches_turtle	Lake_2018
0.32083	0.974074	0.971646	0.473212	brain	Tosches_turtle	Tasic18
0.459738	0.669608	0.671567	0.707061	brain	Tosches_turtle	Quake_Smart-seq2_Brain_Non-Myeloid
0.343866	0.746487	0.743655	0.555898	brain	Tosches_turtle	Campbell
0.405654	0.830176	0.779965	0.735304	brain	Tosches_turtle	Chen
0.820905	0.955382	0.954383	0.817791	brain	Tosches_turtle	Tosches_lizard
0.426457	0.815082	0.790089	0.624443	testis	testis_human	testis_mouse
0.873144	0.932071	0.934365	0.718663	testis	testis_human	testis_monkey
0.309679	0.612647	0.595433	0.673926	testis	testis_mouse	testis_human
0.470216	0.880002	0.86734	0.697247	testis	testis_mouse	testis_monkey
0.795563	0.865985	0.863193	0.7616	testis	testis_monkey	testis_human
0.311725	0.72349	0.686413	0.59377	testis	testis_monkey	testis_mouse
0.659123	0.960586	0.955952	0.635978	retina	Menon_microfluidics	mouse_LD_P60
0.713914	0.894162	0.894449	0.674631	retina	Menon_microfluidics	mouse_LD_24hr
0.624813	0.910095	0.901114	0.616365	retina	Menon_microfluidics	mouse_LD_10hr
0.548567	0.894621	0.881707	0.657451	retina	Menon_microfluidics	mouse_LD_4hr
0.667662	0.947906	0.939208	0.628404	retina	Menon_microfluidics	mouse_LD_0hr
0.636522	0.954046	0.949775	0.697163	retina	Menon_microfluidics	mouse_NMDA_P60
0.558029	0.933908	0.929371	0.674139	retina	Menon_microfluidics	mouse_NMDA_72hr
0.569017	0.94406	0.927346	0.690893	retina	Menon_microfluidics	mouse_NMDA_48hr
0.624246	0.937588	0.940242	0.740623	retina	Menon_microfluidics	mouse_NMDA_36hr
0.549122	0.93273	0.92537	0.698678	retina	Menon_microfluidics	mouse_NMDA_24hr
0.626506	0.982901	0.980355	0.749057	retina	Menon_microfluidics	mouse_NMDA_12hr
0.70349	0.978991	0.975008	0.729145	retina	Menon_microfluidics	mouse_NMDA_6hr
0.62936	0.922244	0.912927	0.669432	retina	Menon_microfluidics	mouse_NMDA_3hr
0.664464	0.945529	0.942399	0.627812	retina	Menon_microfluidics	Macosko
0.481379	0.816375	0.806765	0.599053	retina	Menon_seqwell	mouse_LD_P60
0.706258	0.878622	0.881203	0.65244	retina	Menon_seqwell	mouse_LD_24hr
0.551092	0.871589	0.853869	0.60216	retina	Menon_seqwell	mouse_LD_10hr
0.499687	0.849037	0.836781	0.647642	retina	Menon_seqwell	mouse_LD_4hr
0.611838	0.857571	0.860142	0.587825	retina	Menon_seqwell	mouse_LD_0hr
0.548232	0.822785	0.827987	0.707531	retina	Menon_seqwell	mouse_NMDA_P60
0.586011	0.855429	0.872636	0.660899	retina	Menon_seqwell	mouse_NMDA_72hr
0.477305	0.84892	0.85662	0.697779	retina	Menon_seqwell	mouse_NMDA_48hr
0.549614	0.954303	0.950413	0.753681	retina	Menon_seqwell	mouse_NMDA_36hr
0.566304	0.919606	0.927039	0.699138	retina	Menon_seqwell	mouse_NMDA_24hr
0.524776	0.923817	0.932781	0.739983	retina	Menon_seqwell	mouse_NMDA_12hr
0.595986	0.867381	0.873912	0.700761	retina	Menon_seqwell	mouse_NMDA_6hr
0.613368	0.880783	0.87893	0.658293	retina	Menon_seqwell	mouse_NMDA_3hr
0.681885	0.929031	0.931686	0.615341	retina	Menon_seqwell	Macosko
0.413624	0.858872	0.843259	0.681906	retina	Menon_microfluidics	chick_P10
0.282833	0.751644	0.71655	0.620284	retina	Menon_seqwell	chick_P10
0.374877	0.583766	0.55417	0.438542	retina	Menon_microfluidics	zebrafish_TNFa_Adult
0.329796	0.632945	0.604968	0.542432	retina	Menon_microfluidics	zebrafish_TNFa_72hr
0.384653	0.690219	0.652895	0.529895	retina	Menon_microfluidics	zebrafish_TNFa_36hr
0.363596	0.633147	0.599489	0.535622	retina	Menon_microfluidics	zebrafish_TNFa_20hr
0.413033	0.679791	0.642747	0.554062	retina	Menon_microfluidics	zebrafish_TNFa_10hr
0.427498	0.657652	0.625455	0.431138	retina	Menon_microfluidics	zebrafish_NMDA_Adult
0.421443	0.737238	0.701289	0.551974	retina	Menon_microfluidics	zebrafish_NMDA_36hr
0.422148	0.732655	0.673039	0.552813	retina	Menon_microfluidics	zebrafish_NMDA_20hr
0.420432	0.61724	0.578168	0.496034	retina	Menon_microfluidics	zebrafish_NMDA_10hr
0.341827	0.541123	0.502234	0.515284	retina	Menon_microfluidics	zebrafish_NMDA_4hr
0.363709	0.598204	0.545343	0.442218	retina	Menon_microfluidics	zebrafish_LD_Adult
0.254301	0.624618	0.610135	0.45349	retina	Menon_microfluidics	zebrafish_LD_36hr
0.315846	0.583607	0.522995	0.447224	retina	Menon_microfluidics	zebrafish_LD_20hr
0.359415	0.605961	0.54669	0.480246	retina	Menon_microfluidics	zebrafish_LD_10hr
0.524055	0.715441	0.703885	0.576045	retina	Menon_microfluidics	zebrafish_LD_4hr
0.353372	0.533014	0.513472	0.407528	retina	Menon_seqwell	zebrafish_TNFa_Adult
0.330721	0.638995	0.596142	0.49996	retina	Menon_seqwell	zebrafish_TNFa_72hr
0.422748	0.574636	0.584942	0.473782	retina	Menon_seqwell	zebrafish_TNFa_36hr
0.3754	0.556637	0.536374	0.474193	retina	Menon_seqwell	zebrafish_TNFa_20hr
0.385381	0.56814	0.547548	0.472388	retina	Menon_seqwell	zebrafish_TNFa_10hr
0.390065	0.624069	0.585476	0.420806	retina	Menon_seqwell	zebrafish_NMDA_Adult
0.409005	0.694348	0.670798	0.507183	retina	Menon_seqwell	zebrafish_NMDA_36hr
0.407047	0.444505	0.404953	0.565663	retina	Menon_seqwell	zebrafish_NMDA_20hr
0.407636	0.652538	0.603343	0.528076	retina	Menon_seqwell	zebrafish_NMDA_10hr
0.395241	0.601984	0.562068	0.512708	retina	Menon_seqwell	zebrafish_NMDA_4hr
0.313083	0.461413	0.434077	0.429495	retina	Menon_seqwell	zebrafish_LD_Adult
0.278003	0.606535	0.610233	0.433802	retina	Menon_seqwell	zebrafish_LD_36hr
0.333392	0.568441	0.535525	0.429802	retina	Menon_seqwell	zebrafish_LD_20hr
0.345144	0.546867	0.523728	0.470307	retina	Menon_seqwell	zebrafish_LD_10hr
0.441392	0.653246	0.626187	0.521707	retina	Menon_seqwell	zebrafish_LD_4hr
0.598005	0.945519	0.931313	0.714849	retina	mouse_LD_P60	Menon_microfluidics
0.707024	0.932937	0.927956	0.702076	retina	mouse_LD_P60	Menon_seqwell
0.619464	0.909877	0.900055	0.665002	retina	mouse_LD_24hr	Menon_microfluidics
0.634479	0.92256	0.916564	0.677145	retina	mouse_LD_24hr	Menon_seqwell
0.591419	0.83585	0.823005	0.695791	retina	mouse_LD_10hr	Menon_microfluidics
0.687692	0.922534	0.911638	0.706552	retina	mouse_LD_10hr	Menon_seqwell
0.685753	0.888767	0.878702	0.675161	retina	mouse_LD_4hr	Menon_microfluidics
0.66675	0.923945	0.919951	0.716491	retina	mouse_LD_4hr	Menon_seqwell
0.710854	0.940754	0.910109	0.688827	retina	mouse_LD_0hr	Menon_microfluidics
0.686671	0.932623	0.929803	0.704474	retina	mouse_LD_0hr	Menon_seqwell
0.660742	0.9551	0.945598	0.726198	retina	mouse_NMDA_P60	Menon_microfluidics
0.691914	0.94401	0.938732	0.725621	retina	mouse_NMDA_P60	Menon_seqwell
0.880909	0.950999	0.943208	0.724547	retina	mouse_NMDA_72hr	Menon_microfluidics
0.693379	0.931589	0.9258	0.694012	retina	mouse_NMDA_72hr	Menon_seqwell
0.742227	0.946573	0.917028	0.70984	retina	mouse_NMDA_48hr	Menon_microfluidics
0.688084	0.934131	0.929187	0.704169	retina	mouse_NMDA_48hr	Menon_seqwell
0.679762	0.947853	0.912349	0.713463	retina	mouse_NMDA_36hr	Menon_microfluidics
0.540212	0.661512	0.645012	0.681287	retina	mouse_NMDA_36hr	Menon_seqwell
0.72394	0.960603	0.955502	0.743327	retina	mouse_NMDA_24hr	Menon_microfluidics
0.617249	0.93171	0.928879	0.707223	retina	mouse_NMDA_24hr	Menon_seqwell
0.783778	0.956699	0.947041	0.732556	retina	mouse_NMDA_12hr	Menon_microfluidics
0.530097	0.671501	0.657328	0.698831	retina	mouse_NMDA_12hr	Menon_seqwell
0.729068	0.960236	0.955502	0.744027	retina	mouse_NMDA_6hr	Menon_microfluidics
0.691219	0.934199	0.931958	0.714442	retina	mouse_NMDA_6hr	Menon_seqwell
0.684057	0.922595	0.90767	0.677545	retina	mouse_NMDA_3hr	Menon_microfluidics
0.69408	0.930979	0.929187	0.706978	retina	mouse_NMDA_3hr	Menon_seqwell
0.800041	0.947023	0.914041	0.711141	retina	Macosko	Menon_microfluidics
0.740517	0.940139	0.932882	0.712154	retina	Macosko	Menon_seqwell
0.634693	0.948092	0.942253	0.697395	retina	mouse_LD_P60	chick_P10
0.705832	0.942347	0.936392	0.696022	retina	mouse_LD_24hr	chick_P10
0.545472	0.917699	0.91063	0.653579	retina	mouse_LD_10hr	chick_P10
0.548327	0.92135	0.915479	0.664615	retina	mouse_LD_4hr	chick_P10
0.566317	0.94345	0.937477	0.702142	retina	mouse_LD_0hr	chick_P10
0.564793	0.939458	0.933787	0.702964	retina	mouse_NMDA_P60	chick_P10
0.510125	0.935223	0.932267	0.703115	retina	mouse_NMDA_72hr	chick_P10
0.567924	0.947266	0.940517	0.701062	retina	mouse_NMDA_48hr	chick_P10
0.455171	0.890309	0.875751	0.678922	retina	mouse_NMDA_36hr	chick_P10
0.566446	0.945334	0.939648	0.700428	retina	mouse_NMDA_24hr	chick_P10
0.550843	0.932879	0.926189	0.688711	retina	mouse_NMDA_12hr	chick_P10
0.45002	0.893423	0.897894	0.697616	retina	mouse_NMDA_6hr	chick_P10
0.566058	0.941716	0.935668	0.699935	retina	mouse_NMDA_3hr	chick_P10
0.523301	0.693099	0.737173	0.566562	retina	Macosko	chick_P10
0.491195	0.649547	0.649833	0.473786	retina	mouse_LD_P60	zebrafish_TNFa_Adult
0.401965	0.700258	0.681629	0.561415	retina	mouse_LD_P60	zebrafish_TNFa_72hr
0.431227	0.732698	0.674111	0.500155	retina	mouse_LD_P60	zebrafish_TNFa_36hr
0.477078	0.731317	0.703696	0.561879	retina	mouse_LD_P60	zebrafish_TNFa_20hr
0.524821	0.748262	0.715631	0.559371	retina	mouse_LD_P60	zebrafish_TNFa_10hr
0.472535	0.736656	0.701565	0.489095	retina	mouse_LD_P60	zebrafish_NMDA_Adult
0.486234	0.610338	0.624194	0.585754	retina	mouse_LD_P60	zebrafish_NMDA_36hr
0.45688	0.807077	0.764719	0.555315	retina	mouse_LD_P60	zebrafish_NMDA_20hr
0.44082	0.679507	0.659192	0.524556	retina	mouse_LD_P60	zebrafish_NMDA_10hr
0.415628	0.632896	0.586977	0.475362	retina	mouse_LD_P60	zebrafish_NMDA_4hr
0.475401	0.582596	0.581576	0.457188	retina	mouse_LD_P60	zebrafish_LD_Adult
0.317898	0.369077	0.384464	0.48872	retina	mouse_LD_P60	zebrafish_LD_36hr
0.409353	0.624001	0.607459	0.468194	retina	mouse_LD_P60	zebrafish_LD_20hr
0.435926	0.655033	0.589361	0.441321	retina	mouse_LD_P60	zebrafish_LD_10hr
0.581728	0.794073	0.774676	0.639198	retina	mouse_LD_P60	zebrafish_LD_4hr
0.549414	0.70931	0.670926	0.448682	retina	mouse_LD_24hr	zebrafish_TNFa_Adult
0.50069	0.691762	0.688816	0.535447	retina	mouse_LD_24hr	zebrafish_TNFa_72hr
0.51168	0.711102	0.689424	0.515542	retina	mouse_LD_24hr	zebrafish_TNFa_36hr
0.545279	0.731837	0.696028	0.521168	retina	mouse_LD_24hr	zebrafish_TNFa_20hr
0.555215	0.751925	0.713686	0.542868	retina	mouse_LD_24hr	zebrafish_TNFa_10hr
0.605217	0.707386	0.689094	0.474778	retina	mouse_LD_24hr	zebrafish_NMDA_Adult
0.535614	0.707956	0.702776	0.556412	retina	mouse_LD_24hr	zebrafish_NMDA_36hr
0.594279	0.827116	0.800999	0.595081	retina	mouse_LD_24hr	zebrafish_NMDA_20hr
0.538556	0.703958	0.666173	0.554424	retina	mouse_LD_24hr	zebrafish_NMDA_10hr
0.430651	0.621263	0.534723	0.467775	retina	mouse_LD_24hr	zebrafish_NMDA_4hr
0.44707	0.591775	0.537131	0.416038	retina	mouse_LD_24hr	zebrafish_LD_Adult
0.461085	0.587868	0.602475	0.513302	retina	mouse_LD_24hr	zebrafish_LD_36hr
0.411387	0.618203	0.572229	0.474042	retina	mouse_LD_24hr	zebrafish_LD_20hr
0.438573	0.611578	0.558936	0.443769	retina	mouse_LD_24hr	zebrafish_LD_10hr
0.545508	0.624071	0.576691	0.502873	retina	mouse_LD_24hr	zebrafish_LD_4hr
0.429466	0.658975	0.610059	0.453692	retina	mouse_LD_10hr	zebrafish_TNFa_Adult
0.357547	0.555487	0.548985	0.536808	retina	mouse_LD_10hr	zebrafish_TNFa_72hr
0.467956	0.682933	0.66103	0.511616	retina	mouse_LD_10hr	zebrafish_TNFa_36hr
0.444618	0.718593	0.677743	0.531631	retina	mouse_LD_10hr	zebrafish_TNFa_20hr
0.580602	0.728642	0.706521	0.568071	retina	mouse_LD_10hr	zebrafish_TNFa_10hr
0.470123	0.679246	0.64855	0.45938	retina	mouse_LD_10hr	zebrafish_NMDA_Adult
0.443218	0.558429	0.562965	0.526206	retina	mouse_LD_10hr	zebrafish_NMDA_36hr
0.51632	0.762436	0.739518	0.590838	retina	mouse_LD_10hr	zebrafish_NMDA_20hr
0.438461	0.69351	0.657288	0.575154	retina	mouse_LD_10hr	zebrafish_NMDA_10hr
0.410616	0.610716	0.549479	0.516881	retina	mouse_LD_10hr	zebrafish_NMDA_4hr
0.462463	0.576189	0.572594	0.461095	retina	mouse_LD_10hr	zebrafish_LD_Adult
0.419368	0.583618	0.598841	0.509047	retina	mouse_LD_10hr	zebrafish_LD_36hr
0.543014	0.687329	0.672022	0.534569	retina	mouse_LD_10hr	zebrafish_LD_20hr
0.503717	0.585215	0.576349	0.503671	retina	mouse_LD_10hr	zebrafish_LD_10hr
0.552516	0.662432	0.666187	0.584549	retina	mouse_LD_10hr	zebrafish_LD_4hr
0.510881	0.685979	0.637259	0.430191	retina	mouse_LD_4hr	zebrafish_TNFa_Adult
0.390296	0.558373	0.566889	0.530411	retina	mouse_LD_4hr	zebrafish_TNFa_72hr
0.435354	0.613049	0.586696	0.492705	retina	mouse_LD_4hr	zebrafish_TNFa_36hr
0.456522	0.668577	0.648447	0.52349	retina	mouse_LD_4hr	zebrafish_TNFa_20hr
0.619214	0.715125	0.71041	0.581665	retina	mouse_LD_4hr	zebrafish_TNFa_10hr
0.509233	0.703858	0.659584	0.483719	retina	mouse_LD_4hr	zebrafish_NMDA_Adult
0.48667	0.70023	0.690382	0.535309	retina	mouse_LD_4hr	zebrafish_NMDA_36hr
0.55966	0.746763	0.739952	0.59353	retina	mouse_LD_4hr	zebrafish_NMDA_20hr
0.428558	0.678969	0.643749	0.54174	retina	mouse_LD_4hr	zebrafish_NMDA_10hr
0.44602	0.628218	0.572221	0.5085	retina	mouse_LD_4hr	zebrafish_NMDA_4hr
0.558782	0.65947	0.646446	0.459209	retina	mouse_LD_4hr	zebrafish_LD_Adult
0.469699	0.62723	0.631739	0.473198	retina	mouse_LD_4hr	zebrafish_LD_36hr
0.436246	0.608715	0.580926	0.506307	retina	mouse_LD_4hr	zebrafish_LD_20hr
0.501037	0.615961	0.588404	0.512447	retina	mouse_LD_4hr	zebrafish_LD_10hr
0.552154	0.593553	0.583885	0.512342	retina	mouse_LD_4hr	zebrafish_LD_4hr
0.479571	0.682175	0.642546	0.446851	retina	mouse_LD_0hr	zebrafish_TNFa_Adult
0.427147	0.700738	0.669903	0.517587	retina	mouse_LD_0hr	zebrafish_TNFa_72hr
0.475987	0.686978	0.670282	0.516023	retina	mouse_LD_0hr	zebrafish_TNFa_36hr
0.481831	0.713325	0.692686	0.565238	retina	mouse_LD_0hr	zebrafish_TNFa_20hr
0.478298	0.711616	0.671717	0.563276	retina	mouse_LD_0hr	zebrafish_TNFa_10hr
0.468903	0.702267	0.64157	0.470063	retina	mouse_LD_0hr	zebrafish_NMDA_Adult
0.414626	0.576362	0.579326	0.55202	retina	mouse_LD_0hr	zebrafish_NMDA_36hr
0.578623	0.736664	0.7393	0.586999	retina	mouse_LD_0hr	zebrafish_NMDA_20hr
0.366941	0.536536	0.504971	0.458567	retina	mouse_LD_0hr	zebrafish_NMDA_10hr
0.385325	0.614522	0.546365	0.4784	retina	mouse_LD_0hr	zebrafish_NMDA_4hr
0.440402	0.560658	0.552168	0.457011	retina	mouse_LD_0hr	zebrafish_LD_Adult
0.325327	0.299098	0.363645	0.436089	retina	mouse_LD_0hr	zebrafish_LD_36hr
0.400345	0.497513	0.485554	0.462434	retina	mouse_LD_0hr	zebrafish_LD_20hr
0.441703	0.441664	0.459242	0.430241	retina	mouse_LD_0hr	zebrafish_LD_10hr
0.449002	0.585131	0.54446	0.448688	retina	mouse_LD_0hr	zebrafish_LD_4hr
0.423664	0.681944	0.620272	0.460306	retina	mouse_NMDA_P60	zebrafish_TNFa_Adult
0.35576	0.616304	0.614424	0.527357	retina	mouse_NMDA_P60	zebrafish_TNFa_72hr
0.449842	0.736588	0.699155	0.516176	retina	mouse_NMDA_P60	zebrafish_TNFa_36hr
0.39823	0.707998	0.665552	0.561631	retina	mouse_NMDA_P60	zebrafish_TNFa_20hr
0.454613	0.658531	0.627905	0.527036	retina	mouse_NMDA_P60	zebrafish_TNFa_10hr
0.415016	0.660745	0.606928	0.437786	retina	mouse_NMDA_P60	zebrafish_NMDA_Adult
0.403334	0.578994	0.579078	0.556583	retina	mouse_NMDA_P60	zebrafish_NMDA_36hr
0.411549	0.75485	0.713665	0.526134	retina	mouse_NMDA_P60	zebrafish_NMDA_20hr
0.345308	0.582407	0.52655	0.467975	retina	mouse_NMDA_P60	zebrafish_NMDA_10hr
0.410648	0.632601	0.564234	0.499098	retina	mouse_NMDA_P60	zebrafish_NMDA_4hr
0.42679	0.55409	0.5398	0.453505	retina	mouse_NMDA_P60	zebrafish_LD_Adult
0.404383	0.646868	0.651773	0.455416	retina	mouse_NMDA_P60	zebrafish_LD_36hr
0.355809	0.665889	0.616156	0.486533	retina	mouse_NMDA_P60	zebrafish_LD_20hr
0.469145	0.683876	0.656716	0.468695	retina	mouse_NMDA_P60	zebrafish_LD_10hr
0.458559	0.671987	0.661295	0.546067	retina	mouse_NMDA_P60	zebrafish_LD_4hr
0.467475	0.671128	0.625763	0.429695	retina	mouse_NMDA_72hr	zebrafish_TNFa_Adult
0.476678	0.764694	0.723616	0.544275	retina	mouse_NMDA_72hr	zebrafish_TNFa_72hr
0.528527	0.719788	0.683682	0.525183	retina	mouse_NMDA_72hr	zebrafish_TNFa_36hr
0.563043	0.787867	0.761109	0.574588	retina	mouse_NMDA_72hr	zebrafish_TNFa_20hr
0.51804	0.734688	0.692497	0.563847	retina	mouse_NMDA_72hr	zebrafish_TNFa_10hr
0.474567	0.693987	0.646754	0.423402	retina	mouse_NMDA_72hr	zebrafish_NMDA_Adult
0.581314	0.797256	0.782598	0.570943	retina	mouse_NMDA_72hr	zebrafish_NMDA_36hr
0.477777	0.787511	0.75038	0.589367	retina	mouse_NMDA_72hr	zebrafish_NMDA_20hr
0.393649	0.676428	0.596573	0.513685	retina	mouse_NMDA_72hr	zebrafish_NMDA_10hr
0.427206	0.651094	0.586977	0.503583	retina	mouse_NMDA_72hr	zebrafish_NMDA_4hr
0.426217	0.575117	0.544419	0.419606	retina	mouse_NMDA_72hr	zebrafish_LD_Adult
0.423378	0.709324	0.714524	0.48332	retina	mouse_NMDA_72hr	zebrafish_LD_36hr
0.422599	0.65478	0.610259	0.471561	retina	mouse_NMDA_72hr	zebrafish_LD_20hr
0.378853	0.601423	0.556257	0.477113	retina	mouse_NMDA_72hr	zebrafish_LD_10hr
0.450748	0.670011	0.644029	0.547223	retina	mouse_NMDA_72hr	zebrafish_LD_4hr
0.460465	0.667166	0.622633	0.435069	retina	mouse_NMDA_48hr	zebrafish_TNFa_Adult
0.452231	0.746363	0.718825	0.54625	retina	mouse_NMDA_48hr	zebrafish_TNFa_72hr
0.365416	0.671113	0.622747	0.499154	retina	mouse_NMDA_48hr	zebrafish_TNFa_36hr
0.521103	0.779177	0.740071	0.561922	retina	mouse_NMDA_48hr	zebrafish_TNFa_20hr
0.475503	0.762422	0.710001	0.585662	retina	mouse_NMDA_48hr	zebrafish_TNFa_10hr
0.395497	0.629166	0.585733	0.39466	retina	mouse_NMDA_48hr	zebrafish_NMDA_Adult
0.441402	0.776168	0.729053	0.575401	retina	mouse_NMDA_48hr	zebrafish_NMDA_36hr
0.420999	0.754173	0.707365	0.548123	retina	mouse_NMDA_48hr	zebrafish_NMDA_20hr
0.430821	0.670789	0.623863	0.548062	retina	mouse_NMDA_48hr	zebrafish_NMDA_10hr
0.512623	0.701353	0.663734	0.566889	retina	mouse_NMDA_48hr	zebrafish_NMDA_4hr
0.336613	0.559203	0.548319	0.406849	retina	mouse_NMDA_48hr	zebrafish_LD_Adult
0.403953	0.727578	0.719631	0.492489	retina	mouse_NMDA_48hr	zebrafish_LD_36hr
0.40133	0.64045	0.596698	0.495486	retina	mouse_NMDA_48hr	zebrafish_LD_20hr
0.435133	0.624041	0.599502	0.501484	retina	mouse_NMDA_48hr	zebrafish_LD_10hr
0.473566	0.67284	0.654676	0.538069	retina	mouse_NMDA_48hr	zebrafish_LD_4hr
0.252755	0.589399	0.524711	0.368551	retina	mouse_NMDA_36hr	zebrafish_TNFa_Adult
0.337433	0.664603	0.62199	0.565252	retina	mouse_NMDA_36hr	zebrafish_TNFa_72hr
0.344661	0.629426	0.584463	0.534404	retina	mouse_NMDA_36hr	zebrafish_TNFa_36hr
0.324651	0.691928	0.628588	0.501161	retina	mouse_NMDA_36hr	zebrafish_TNFa_20hr
0.335216	0.631291	0.583888	0.547201	retina	mouse_NMDA_36hr	zebrafish_TNFa_10hr
0.365894	0.647966	0.587734	0.389897	retina	mouse_NMDA_36hr	zebrafish_NMDA_Adult
0.423089	0.68489	0.659643	0.514768	retina	mouse_NMDA_36hr	zebrafish_NMDA_36hr
0.403953	0.742064	0.70063	0.560155	retina	mouse_NMDA_36hr	zebrafish_NMDA_20hr
0.322705	0.652042	0.579437	0.481216	retina	mouse_NMDA_36hr	zebrafish_NMDA_10hr
0.331558	0.635749	0.554758	0.414645	retina	mouse_NMDA_36hr	zebrafish_NMDA_4hr
0.269074	0.507222	0.47688	0.390825	retina	mouse_NMDA_36hr	zebrafish_LD_Adult
0.376943	0.741898	0.716685	0.478513	retina	mouse_NMDA_36hr	zebrafish_LD_36hr
0.341689	0.608275	0.575472	0.482644	retina	mouse_NMDA_36hr	zebrafish_LD_20hr
0.324054	0.551023	0.505932	0.513335	retina	mouse_NMDA_36hr	zebrafish_LD_10hr
0.38837	0.509238	0.484892	0.500165	retina	mouse_NMDA_36hr	zebrafish_LD_4hr
0.462766	0.648646	0.606261	0.410125	retina	mouse_NMDA_24hr	zebrafish_TNFa_Adult
0.390501	0.764464	0.711764	0.546685	retina	mouse_NMDA_24hr	zebrafish_TNFa_72hr
0.473416	0.761055	0.71383	0.534719	retina	mouse_NMDA_24hr	zebrafish_TNFa_36hr
0.51456	0.750014	0.721785	0.546714	retina	mouse_NMDA_24hr	zebrafish_TNFa_20hr
0.420168	0.723209	0.666803	0.556569	retina	mouse_NMDA_24hr	zebrafish_TNFa_10hr
0.534809	0.692933	0.675135	0.410727	retina	mouse_NMDA_24hr	zebrafish_NMDA_Adult
0.47423	0.785793	0.749132	0.521617	retina	mouse_NMDA_24hr	zebrafish_NMDA_36hr
0.539986	0.82758	0.799696	0.590554	retina	mouse_NMDA_24hr	zebrafish_NMDA_20hr
0.448648	0.698107	0.651999	0.505601	retina	mouse_NMDA_24hr	zebrafish_NMDA_10hr
0.52867	0.73502	0.680114	0.501792	retina	mouse_NMDA_24hr	zebrafish_NMDA_4hr
0.492458	0.626428	0.604465	0.431633	retina	mouse_NMDA_24hr	zebrafish_LD_Adult
0.502319	0.710474	0.717961	0.479007	retina	mouse_NMDA_24hr	zebrafish_LD_36hr
0.502242	0.684976	0.665537	0.49154	retina	mouse_NMDA_24hr	zebrafish_LD_20hr
0.373284	0.581897	0.561232	0.489031	retina	mouse_NMDA_24hr	zebrafish_LD_10hr
0.572546	0.747983	0.747914	0.608036	retina	mouse_NMDA_24hr	zebrafish_LD_4hr
0.396776	0.49199	0.486323	0.371206	retina	mouse_NMDA_12hr	zebrafish_TNFa_Adult
0.365637	0.596777	0.583785	0.439056	retina	mouse_NMDA_12hr	zebrafish_TNFa_72hr
0.420736	0.609882	0.597065	0.467247	retina	mouse_NMDA_12hr	zebrafish_TNFa_36hr
0.466575	0.674377	0.652969	0.534437	retina	mouse_NMDA_12hr	zebrafish_TNFa_20hr
0.52968	0.70897	0.680622	0.575725	retina	mouse_NMDA_12hr	zebrafish_TNFa_10hr
0.419257	0.567126	0.53164	0.374354	retina	mouse_NMDA_12hr	zebrafish_NMDA_Adult
0.467485	0.782399	0.745662	0.546133	retina	mouse_NMDA_12hr	zebrafish_NMDA_36hr
0.49029	0.76908	0.738649	0.557979	retina	mouse_NMDA_12hr	zebrafish_NMDA_20hr
0.42592	0.706551	0.660038	0.522335	retina	mouse_NMDA_12hr	zebrafish_NMDA_10hr
0.502408	0.673851	0.632462	0.463651	retina	mouse_NMDA_12hr	zebrafish_NMDA_4hr
0.497883	0.573532	0.569772	0.415628	retina	mouse_NMDA_12hr	zebrafish_LD_Adult
0.4462	0.685026	0.695375	0.47566	retina	mouse_NMDA_12hr	zebrafish_LD_36hr
0.367774	0.576876	0.564711	0.438957	retina	mouse_NMDA_12hr	zebrafish_LD_20hr
0.401865	0.566721	0.523345	0.486744	retina	mouse_NMDA_12hr	zebrafish_LD_10hr
0.384937	0.595443	0.604029	0.522791	retina	mouse_NMDA_12hr	zebrafish_LD_4hr
0.396687	0.634039	0.597485	0.420447	retina	mouse_NMDA_6hr	zebrafish_TNFa_Adult
0.416484	0.747068	0.699155	0.500749	retina	mouse_NMDA_6hr	zebrafish_TNFa_72hr
0.33602	0.672437	0.581432	0.410003	retina	mouse_NMDA_6hr	zebrafish_TNFa_36hr
0.531848	0.735532	0.724931	0.562958	retina	mouse_NMDA_6hr	zebrafish_TNFa_20hr
0.554042	0.729909	0.714505	0.564239	retina	mouse_NMDA_6hr	zebrafish_TNFa_10hr
0.514894	0.644683	0.639723	0.471998	retina	mouse_NMDA_6hr	zebrafish_NMDA_Adult
0.49975	0.794789	0.769212	0.53733	retina	mouse_NMDA_6hr	zebrafish_NMDA_36hr
0.555628	0.803745	0.78753	0.633856	retina	mouse_NMDA_6hr	zebrafish_NMDA_20hr
0.510083	0.693987	0.675058	0.520525	retina	mouse_NMDA_6hr	zebrafish_NMDA_10hr
0.453686	0.666444	0.626777	0.507053	retina	mouse_NMDA_6hr	zebrafish_NMDA_4hr
0.485894	0.615686	0.611445	0.438559	retina	mouse_NMDA_6hr	zebrafish_LD_Adult
0.470775	0.660728	0.67593	0.481954	retina	mouse_NMDA_6hr	zebrafish_LD_36hr
0.444235	0.658262	0.635318	0.477362	retina	mouse_NMDA_6hr	zebrafish_LD_20hr
0.521449	0.703238	0.686376	0.511677	retina	mouse_NMDA_6hr	zebrafish_LD_10hr
0.545714	0.670133	0.682014	0.562137	retina	mouse_NMDA_6hr	zebrafish_LD_4hr
0.42536	0.688673	0.642392	0.439687	retina	mouse_NMDA_3hr	zebrafish_TNFa_Adult
0.432843	0.733373	0.705712	0.562415	retina	mouse_NMDA_3hr	zebrafish_TNFa_72hr
0.492838	0.76821	0.723082	0.536292	retina	mouse_NMDA_3hr	zebrafish_TNFa_36hr
0.525835	0.778154	0.746756	0.559106	retina	mouse_NMDA_3hr	zebrafish_TNFa_20hr
0.486913	0.728093	0.711434	0.545166	retina	mouse_NMDA_3hr	zebrafish_TNFa_10hr
0.517652	0.661636	0.64429	0.466601	retina	mouse_NMDA_3hr	zebrafish_NMDA_Adult
0.417031	0.662221	0.654189	0.5553	retina	mouse_NMDA_3hr	zebrafish_NMDA_36hr
0.469748	0.798087	0.767326	0.61005	retina	mouse_NMDA_3hr	zebrafish_NMDA_20hr
0.364617	0.574321	0.528242	0.495946	retina	mouse_NMDA_3hr	zebrafish_NMDA_10hr
0.421549	0.606192	0.567348	0.511326	retina	mouse_NMDA_3hr	zebrafish_NMDA_4hr
0.432301	0.482696	0.498127	0.433168	retina	mouse_NMDA_3hr	zebrafish_LD_Adult
0.489873	0.717632	0.715408	0.525871	retina	mouse_NMDA_3hr	zebrafish_LD_36hr
0.361086	0.553744	0.552624	0.501822	retina	mouse_NMDA_3hr	zebrafish_LD_20hr
0.406744	0.583093	0.582281	0.506723	retina	mouse_NMDA_3hr	zebrafish_LD_10hr
0.497073	0.553128	0.552806	0.582615	retina	mouse_NMDA_3hr	zebrafish_LD_4hr
0.406464	0.619929	0.589787	0.442717	retina	Macosko	zebrafish_TNFa_Adult
0.348771	0.60693	0.580885	0.480465	retina	Macosko	zebrafish_TNFa_72hr
0.226605	0.348888	0.306428	0.352896	retina	Macosko	zebrafish_TNFa_36hr
0.482933	0.669223	0.6628	0.551297	retina	Macosko	zebrafish_TNFa_20hr
0.407481	0.55577	0.552667	0.453732	retina	Macosko	zebrafish_TNFa_10hr
0.44831	0.535048	0.531229	0.428017	retina	Macosko	zebrafish_NMDA_Adult
0.434514	0.550851	0.580317	0.563102	retina	Macosko	zebrafish_NMDA_36hr
0.411235	0.698467	0.671084	0.571816	retina	Macosko	zebrafish_NMDA_20hr
0.355817	0.497905	0.415062	0.421537	retina	Macosko	zebrafish_NMDA_10hr
0.347726	0.583009	0.510356	0.442141	retina	Macosko	zebrafish_NMDA_4hr
0.458518	0.713062	0.670618	0.462117	retina	Macosko	zebrafish_LD_Adult
0.326851	0.371991	0.374349	0.43603	retina	Macosko	zebrafish_LD_36hr
0.259803	0.594147	0.541126	0.403911	retina	Macosko	zebrafish_LD_20hr
0.334533	0.409041	0.363567	0.344458	retina	Macosko	zebrafish_LD_10hr
0.490745	0.744951	0.741007	0.56111	retina	Macosko	zebrafish_LD_4hr
0.460307	0.921666	0.886865	0.658237	retina	chick_P10	Menon_microfluidics
0.489917	0.894173	0.867303	0.666226	retina	chick_P10	Menon_seqwell
0.472738	0.962059	0.950839	0.620479	retina	chick_P10	mouse_LD_P60
0.492488	0.928925	0.91169	0.671651	retina	chick_P10	mouse_LD_24hr
0.444386	0.91837	0.899859	0.613836	retina	chick_P10	mouse_LD_10hr
0.45294	0.913169	0.891403	0.641497	retina	chick_P10	mouse_LD_4hr
0.476269	0.954683	0.938153	0.626321	retina	chick_P10	mouse_LD_0hr
0.448834	0.964565	0.952969	0.697048	retina	chick_P10	mouse_NMDA_P60
0.405751	0.950391	0.929757	0.652901	retina	chick_P10	mouse_NMDA_72hr
0.431392	0.935992	0.899017	0.649694	retina	chick_P10	mouse_NMDA_48hr
0.45193	0.962331	0.949142	0.71909	retina	chick_P10	mouse_NMDA_36hr
0.420678	0.968835	0.956843	0.688595	retina	chick_P10	mouse_NMDA_24hr
0.449482	0.976938	0.968047	0.728375	retina	chick_P10	mouse_NMDA_12hr
0.464837	0.970058	0.958562	0.706749	retina	chick_P10	mouse_NMDA_6hr
0.460652	0.936189	0.91642	0.667422	retina	chick_P10	mouse_NMDA_3hr
0.464119	0.958465	0.951951	0.629624	retina	chick_P10	Macosko
0.306675	0.707202	0.631306	0.424128	retina	chick_P10	zebrafish_TNFa_Adult
0.285417	0.654028	0.569033	0.46124	retina	chick_P10	zebrafish_TNFa_72hr
0.290567	0.673574	0.58558	0.459528	retina	chick_P10	zebrafish_TNFa_36hr
0.312	0.741563	0.665356	0.507604	retina	chick_P10	zebrafish_TNFa_20hr
0.305325	0.700712	0.633432	0.518852	retina	chick_P10	zebrafish_TNFa_10hr
0.357657	0.733148	0.670003	0.43926	retina	chick_P10	zebrafish_NMDA_Adult
0.331838	0.652827	0.616014	0.495979	retina	chick_P10	zebrafish_NMDA_36hr
0.323998	0.709157	0.663698	0.512993	retina	chick_P10	zebrafish_NMDA_20hr
0.311566	0.6009	0.546012	0.472286	retina	chick_P10	zebrafish_NMDA_10hr
0.330935	0.64483	0.58075	0.480628	retina	chick_P10	zebrafish_NMDA_4hr
0.259751	0.633552	0.558276	0.410104	retina	chick_P10	zebrafish_LD_Adult
0.144665	0.190487	0.161838	0.36693	retina	chick_P10	zebrafish_LD_36hr
0.293183	0.651106	0.586675	0.414978	retina	chick_P10	zebrafish_LD_20hr
0.279497	0.622641	0.542289	0.438438	retina	chick_P10	zebrafish_LD_10hr
0.319922	0.633912	0.563741	0.554923	retina	chick_P10	zebrafish_LD_4hr
0.356848	0.366039	0.328356	0.612419	retina	zebrafish_TNFa_Adult	Menon_microfluidics
0.528372	0.759083	0.693966	0.646803	retina	zebrafish_TNFa_Adult	Menon_seqwell
0.342241	0.21062	0.23727	0.570584	retina	zebrafish_TNFa_72hr	Menon_microfluidics
0.405875	0.565769	0.521244	0.605319	retina	zebrafish_TNFa_72hr	Menon_seqwell
0.18541	0.23793	0.175153	0.511387	retina	zebrafish_TNFa_36hr	Menon_microfluidics
0.542037	0.754997	0.690271	0.611602	retina	zebrafish_TNFa_36hr	Menon_seqwell
0.326126	0.374129	0.335772	0.529805	retina	zebrafish_TNFa_20hr	Menon_microfluidics
0.594529	0.758467	0.694889	0.637466	retina	zebrafish_TNFa_20hr	Menon_seqwell
0.24377	0.324497	0.299438	0.488729	retina	zebrafish_TNFa_10hr	Menon_microfluidics
0.459846	0.742877	0.668719	0.600679	retina	zebrafish_TNFa_10hr	Menon_seqwell
0.48528	0.701898	0.728137	0.693475	retina	zebrafish_NMDA_Adult	Menon_microfluidics
0.60487	0.922014	0.908559	0.694435	retina	zebrafish_NMDA_Adult	Menon_seqwell
0.361842	0.903684	0.878752	0.642966	retina	zebrafish_NMDA_36hr	Menon_microfluidics
0.57892	0.911076	0.902094	0.671521	retina	zebrafish_NMDA_36hr	Menon_seqwell
0.550953	0.919531	0.912448	0.6496	retina	zebrafish_NMDA_20hr	Menon_microfluidics
0.635992	0.905658	0.900246	0.677282	retina	zebrafish_NMDA_20hr	Menon_seqwell
0.540028	0.786156	0.816833	0.588108	retina	zebrafish_NMDA_10hr	Menon_microfluidics
0.655035	0.893073	0.890394	0.69475	retina	zebrafish_NMDA_10hr	Menon_seqwell
0.398171	0.658697	0.686974	0.615732	retina	zebrafish_NMDA_4hr	Menon_microfluidics
0.47318	0.726001	0.727525	0.688633	retina	zebrafish_NMDA_4hr	Menon_seqwell
0.512447	0.847095	0.846449	0.652203	retina	zebrafish_LD_Adult	Menon_microfluidics
0.677851	0.928121	0.927956	0.724481	retina	zebrafish_LD_Adult	Menon_seqwell
0.380281	0.572615	0.591807	0.490444	retina	zebrafish_LD_36hr	Menon_microfluidics
0.574814	0.855114	0.855296	0.680213	retina	zebrafish_LD_36hr	Menon_seqwell
0.401578	0.646623	0.650938	0.397421	retina	zebrafish_LD_20hr	Menon_microfluidics
0.527464	0.902995	0.893781	0.680089	retina	zebrafish_LD_20hr	Menon_seqwell
0.409183	0.788111	0.77144	0.48218	retina	zebrafish_LD_10hr	Menon_microfluidics
0.518253	0.857617	0.851909	0.673657	retina	zebrafish_LD_10hr	Menon_seqwell
0.317862	0.648926	0.594246	0.464869	retina	zebrafish_LD_4hr	Menon_microfluidics
0.544371	0.759839	0.748461	0.620951	retina	zebrafish_LD_4hr	Menon_seqwell
0.634441	0.80984	0.716505	0.479837	retina	zebrafish_TNFa_Adult	mouse_LD_P60
0.718933	0.852335	0.797939	0.561725	retina	zebrafish_TNFa_Adult	mouse_LD_24hr
0.466183	0.681946	0.633496	0.482709	retina	zebrafish_TNFa_Adult	mouse_LD_10hr
0.527301	0.824362	0.746283	0.534727	retina	zebrafish_TNFa_Adult	mouse_LD_4hr
0.566874	0.887213	0.825266	0.541949	retina	zebrafish_TNFa_Adult	mouse_LD_0hr
0.533604	0.775682	0.699521	0.559978	retina	zebrafish_TNFa_Adult	mouse_NMDA_P60
0.427149	0.651966	0.559629	0.514801	retina	zebrafish_TNFa_Adult	mouse_NMDA_72hr
0.576188	0.903374	0.878975	0.644589	retina	zebrafish_TNFa_Adult	mouse_NMDA_48hr
0.371882	0.49799	0.508582	0.59633	retina	zebrafish_TNFa_Adult	mouse_NMDA_36hr
0.538	0.683765	0.61588	0.548131	retina	zebrafish_TNFa_Adult	mouse_NMDA_24hr
0.378598	0.191855	0.190769	0.601286	retina	zebrafish_TNFa_Adult	mouse_NMDA_12hr
0.641661	0.798509	0.698807	0.536007	retina	zebrafish_TNFa_Adult	mouse_NMDA_6hr
0.605868	0.882938	0.826928	0.581957	retina	zebrafish_TNFa_Adult	mouse_NMDA_3hr
0.409819	0.387063	0.285462	0.408982	retina	zebrafish_TNFa_Adult	Macosko
0.515051	0.42564	0.421277	0.525838	retina	zebrafish_TNFa_72hr	mouse_LD_P60
0.562507	0.710357	0.688814	0.579346	retina	zebrafish_TNFa_72hr	mouse_LD_24hr
0.405487	0.307218	0.313138	0.486032	retina	zebrafish_TNFa_72hr	mouse_LD_10hr
0.532936	0.838188	0.768261	0.562056	retina	zebrafish_TNFa_72hr	mouse_LD_4hr
0.554394	0.670707	0.677502	0.494093	retina	zebrafish_TNFa_72hr	mouse_LD_0hr
0.468355	0.471448	0.469734	0.584558	retina	zebrafish_TNFa_72hr	mouse_NMDA_P60
0.542151	0.795047	0.742956	0.541934	retina	zebrafish_TNFa_72hr	mouse_NMDA_72hr
0.594657	0.921167	0.896705	0.643282	retina	zebrafish_TNFa_72hr	mouse_NMDA_48hr
0.399765	0.450054	0.401144	0.634509	retina	zebrafish_TNFa_72hr	mouse_NMDA_36hr
0.437011	0.243108	0.272055	0.569624	retina	zebrafish_TNFa_72hr	mouse_NMDA_24hr
0.317954	0.21563	0.164734	0.589905	retina	zebrafish_TNFa_72hr	mouse_NMDA_12hr
0.528924	0.394041	0.398904	0.628049	retina	zebrafish_TNFa_72hr	mouse_NMDA_6hr
0.567968	0.881562	0.826391	0.581127	retina	zebrafish_TNFa_72hr	mouse_NMDA_3hr
0.372485	0.21246	0.182891	0.518974	retina	zebrafish_TNFa_72hr	Macosko
0.4125	0.380006	0.371723	0.506212	retina	zebrafish_TNFa_36hr	mouse_LD_P60
0.506091	0.672074	0.659378	0.579854	retina	zebrafish_TNFa_36hr	mouse_LD_24hr
0.425786	0.283567	0.338565	0.450021	retina	zebrafish_TNFa_36hr	mouse_LD_10hr
0.446587	0.638939	0.602456	0.524676	retina	zebrafish_TNFa_36hr	mouse_LD_4hr
0.49981	0.441054	0.464025	0.504548	retina	zebrafish_TNFa_36hr	mouse_LD_0hr
0.494065	0.761098	0.672812	0.528051	retina	zebrafish_TNFa_36hr	mouse_NMDA_P60
0.508277	0.663872	0.650328	0.535492	retina	zebrafish_TNFa_36hr	mouse_NMDA_72hr
0.554654	0.51235	0.553286	0.660414	retina	zebrafish_TNFa_36hr	mouse_NMDA_48hr
0.363397	0.434274	0.396058	0.588045	retina	zebrafish_TNFa_36hr	mouse_NMDA_36hr
0.442883	0.301388	0.299714	0.526234	retina	zebrafish_TNFa_36hr	mouse_NMDA_24hr
0.407338	0.237881	0.209704	0.573158	retina	zebrafish_TNFa_36hr	mouse_NMDA_12hr
0.376121	0.269769	0.266527	0.617012	retina	zebrafish_TNFa_36hr	mouse_NMDA_6hr
0.555964	0.883029	0.828003	0.583897	retina	zebrafish_TNFa_36hr	mouse_NMDA_3hr
0.361907	0.256766	0.198737	0.486131	retina	zebrafish_TNFa_36hr	Macosko
0.572891	0.793138	0.688778	0.445525	retina	zebrafish_TNFa_20hr	mouse_LD_P60
0.525216	0.838178	0.783011	0.551351	retina	zebrafish_TNFa_20hr	mouse_LD_24hr
0.387221	0.254726	0.285669	0.505143	retina	zebrafish_TNFa_20hr	mouse_LD_10hr
0.475016	0.822414	0.740465	0.505312	retina	zebrafish_TNFa_20hr	mouse_LD_4hr
0.500993	0.557128	0.568128	0.53446	retina	zebrafish_TNFa_20hr	mouse_LD_0hr
0.461132	0.498866	0.487299	0.565059	retina	zebrafish_TNFa_20hr	mouse_NMDA_P60
0.491911	0.618112	0.603242	0.527904	retina	zebrafish_TNFa_20hr	mouse_NMDA_72hr
0.492344	0.919864	0.878589	0.612791	retina	zebrafish_TNFa_20hr	mouse_NMDA_48hr
0.336662	0.37293	0.337572	0.602095	retina	zebrafish_TNFa_20hr	mouse_NMDA_36hr
0.491048	0.345682	0.358608	0.586257	retina	zebrafish_TNFa_20hr	mouse_NMDA_24hr
0.352049	0.274853	0.222722	0.574547	retina	zebrafish_TNFa_20hr	mouse_NMDA_12hr
0.50027	0.403704	0.409868	0.639425	retina	zebrafish_TNFa_20hr	mouse_NMDA_6hr
0.695784	0.885064	0.844531	0.604815	retina	zebrafish_TNFa_20hr	mouse_NMDA_3hr
0.38819	0.216124	0.167582	0.456524	retina	zebrafish_TNFa_20hr	Macosko
0.56181	0.441425	0.390863	0.460009	retina	zebrafish_TNFa_10hr	mouse_LD_P60
0.624581	0.851202	0.780278	0.558805	retina	zebrafish_TNFa_10hr	mouse_LD_24hr
0.425457	0.280915	0.293047	0.556056	retina	zebrafish_TNFa_10hr	mouse_LD_10hr
0.492953	0.776707	0.714609	0.525037	retina	zebrafish_TNFa_10hr	mouse_LD_4hr
0.468502	0.449079	0.463059	0.520762	retina	zebrafish_TNFa_10hr	mouse_LD_0hr
0.454232	0.575869	0.551749	0.53838	retina	zebrafish_TNFa_10hr	mouse_NMDA_P60
0.454709	0.837597	0.752991	0.501158	retina	zebrafish_TNFa_10hr	mouse_NMDA_72hr
0.653776	0.92083	0.90345	0.659665	retina	zebrafish_TNFa_10hr	mouse_NMDA_48hr
0.440182	0.51006	0.516211	0.588031	retina	zebrafish_TNFa_10hr	mouse_NMDA_36hr
0.367238	0.601225	0.563186	0.563067	retina	zebrafish_TNFa_10hr	mouse_NMDA_24hr
0.424014	0.282451	0.256568	0.596397	retina	zebrafish_TNFa_10hr	mouse_NMDA_12hr
0.674979	0.720546	0.670268	0.574116	retina	zebrafish_TNFa_10hr	mouse_NMDA_6hr
0.564297	0.870698	0.818732	0.565184	retina	zebrafish_TNFa_10hr	mouse_NMDA_3hr
0.394841	0.242732	0.187578	0.45549	retina	zebrafish_TNFa_10hr	Macosko
0.596304	0.904136	0.890535	0.563417	retina	zebrafish_NMDA_Adult	mouse_LD_P60
0.554506	0.777464	0.779857	0.578108	retina	zebrafish_NMDA_Adult	mouse_LD_24hr
0.571205	0.865967	0.854968	0.578068	retina	zebrafish_NMDA_Adult	mouse_LD_10hr
0.582446	0.874728	0.868132	0.626936	retina	zebrafish_NMDA_Adult	mouse_LD_4hr
0.646031	0.873464	0.868312	0.578366	retina	zebrafish_NMDA_Adult	mouse_LD_0hr
0.627645	0.911826	0.901873	0.652798	retina	zebrafish_NMDA_Adult	mouse_NMDA_P60
0.5501	0.901428	0.889232	0.613463	retina	zebrafish_NMDA_Adult	mouse_NMDA_72hr
0.564414	0.913849	0.904028	0.662349	retina	zebrafish_NMDA_Adult	mouse_NMDA_48hr
0.665884	0.935335	0.93897	0.711903	retina	zebrafish_NMDA_Adult	mouse_NMDA_36hr
0.717109	0.917265	0.920362	0.640518	retina	zebrafish_NMDA_Adult	mouse_NMDA_24hr
0.481868	0.775869	0.777988	0.684864	retina	zebrafish_NMDA_Adult	mouse_NMDA_12hr
0.558475	0.878665	0.861013	0.626182	retina	zebrafish_NMDA_Adult	mouse_NMDA_6hr
0.688461	0.897393	0.887261	0.64602	retina	zebrafish_NMDA_Adult	mouse_NMDA_3hr
0.539673	0.931853	0.911868	0.54501	retina	zebrafish_NMDA_Adult	Macosko
0.527191	0.799633	0.795621	0.523362	retina	zebrafish_NMDA_36hr	mouse_LD_P60
0.57089	0.763013	0.766611	0.529654	retina	zebrafish_NMDA_36hr	mouse_LD_24hr
0.495287	0.859207	0.837231	0.544678	retina	zebrafish_NMDA_36hr	mouse_LD_10hr
0.463829	0.707748	0.69457	0.497385	retina	zebrafish_NMDA_36hr	mouse_LD_4hr
0.559581	0.774486	0.779056	0.517037	retina	zebrafish_NMDA_36hr	mouse_LD_0hr
0.58792	0.876506	0.859051	0.584784	retina	zebrafish_NMDA_36hr	mouse_NMDA_P60
0.584432	0.851992	0.852953	0.590671	retina	zebrafish_NMDA_36hr	mouse_NMDA_72hr
0.531562	0.882973	0.878204	0.630841	retina	zebrafish_NMDA_36hr	mouse_NMDA_48hr
0.575838	0.643905	0.656071	0.691487	retina	zebrafish_NMDA_36hr	mouse_NMDA_36hr
0.662288	0.889546	0.90701	0.654905	retina	zebrafish_NMDA_36hr	mouse_NMDA_24hr
0.384636	0.677132	0.728521	0.650393	retina	zebrafish_NMDA_36hr	mouse_NMDA_12hr
0.715373	0.832694	0.83328	0.637078	retina	zebrafish_NMDA_36hr	mouse_NMDA_6hr
0.539358	0.69288	0.706799	0.604465	retina	zebrafish_NMDA_36hr	mouse_NMDA_3hr
0.522344	0.904355	0.905508	0.56455	retina	zebrafish_NMDA_36hr	Macosko
0.588906	0.893642	0.878998	0.543796	retina	zebrafish_NMDA_20hr	mouse_LD_P60
0.628374	0.836802	0.83894	0.587578	retina	zebrafish_NMDA_20hr	mouse_LD_24hr
0.544774	0.823102	0.820279	0.529778	retina	zebrafish_NMDA_20hr	mouse_LD_10hr
0.575448	0.734225	0.757272	0.569847	retina	zebrafish_NMDA_20hr	mouse_LD_4hr
0.494722	0.76588	0.787139	0.508263	retina	zebrafish_NMDA_20hr	mouse_LD_0hr
0.550816	0.717579	0.699956	0.55556	retina	zebrafish_NMDA_20hr	mouse_NMDA_P60
0.563015	0.8769	0.881899	0.572372	retina	zebrafish_NMDA_20hr	mouse_NMDA_72hr
0.618471	0.925614	0.926961	0.668114	retina	zebrafish_NMDA_20hr	mouse_NMDA_48hr
0.641055	0.947243	0.950413	0.720197	retina	zebrafish_NMDA_20hr	mouse_NMDA_36hr
0.533973	0.904964	0.885789	0.595979	retina	zebrafish_NMDA_20hr	mouse_NMDA_24hr
0.60498	0.973925	0.969941	0.719434	retina	zebrafish_NMDA_20hr	mouse_NMDA_12hr
0.558204	0.784042	0.807481	0.619002	retina	zebrafish_NMDA_20hr	mouse_NMDA_6hr
0.61635	0.836506	0.832303	0.556784	retina	zebrafish_NMDA_20hr	mouse_NMDA_3hr
0.531191	0.862817	0.87009	0.559182	retina	zebrafish_NMDA_20hr	Macosko
0.650056	0.901955	0.884046	0.549461	retina	zebrafish_NMDA_10hr	mouse_LD_P60
0.575863	0.797483	0.805719	0.57073	retina	zebrafish_NMDA_10hr	mouse_LD_24hr
0.549436	0.869956	0.864385	0.573142	retina	zebrafish_NMDA_10hr	mouse_LD_10hr
0.601997	0.807216	0.813187	0.57506	retina	zebrafish_NMDA_10hr	mouse_LD_4hr
0.583741	0.810685	0.812791	0.520825	retina	zebrafish_NMDA_10hr	mouse_LD_0hr
0.589379	0.895486	0.890115	0.633842	retina	zebrafish_NMDA_10hr	mouse_NMDA_P60
0.570871	0.824328	0.845619	0.609125	retina	zebrafish_NMDA_10hr	mouse_NMDA_72hr
0.535568	0.8929	0.894585	0.654232	retina	zebrafish_NMDA_10hr	mouse_NMDA_48hr
0.473946	0.78274	0.820089	0.723113	retina	zebrafish_NMDA_10hr	mouse_NMDA_36hr
0.595592	0.944368	0.942775	0.652216	retina	zebrafish_NMDA_10hr	mouse_NMDA_24hr
0.471485	0.795598	0.810414	0.677718	retina	zebrafish_NMDA_10hr	mouse_NMDA_12hr
0.61349	0.933845	0.919381	0.654912	retina	zebrafish_NMDA_10hr	mouse_NMDA_6hr
0.680704	0.848248	0.844397	0.600436	retina	zebrafish_NMDA_10hr	mouse_NMDA_3hr
0.565244	0.93063	0.929588	0.589662	retina	zebrafish_NMDA_10hr	Macosko
0.595004	0.803586	0.824397	0.547467	retina	zebrafish_NMDA_4hr	mouse_LD_P60
0.684306	0.834023	0.837889	0.59891	retina	zebrafish_NMDA_4hr	mouse_LD_24hr
0.502481	0.677109	0.682938	0.541472	retina	zebrafish_NMDA_4hr	mouse_LD_10hr
0.66259	0.832441	0.830963	0.602388	retina	zebrafish_NMDA_4hr	mouse_LD_4hr
0.558833	0.833211	0.831855	0.539134	retina	zebrafish_NMDA_4hr	mouse_LD_0hr
0.639887	0.893092	0.892292	0.626403	retina	zebrafish_NMDA_4hr	mouse_NMDA_P60
0.620872	0.845476	0.864145	0.601232	retina	zebrafish_NMDA_4hr	mouse_NMDA_72hr
0.526588	0.887318	0.883407	0.633009	retina	zebrafish_NMDA_4hr	mouse_NMDA_48hr
0.436851	0.385448	0.44946	0.699597	retina	zebrafish_NMDA_4hr	mouse_NMDA_36hr
0.583884	0.78052	0.783262	0.656885	retina	zebrafish_NMDA_4hr	mouse_NMDA_24hr
0.535697	0.786347	0.784379	0.703377	retina	zebrafish_NMDA_4hr	mouse_NMDA_12hr
0.651939	0.874584	0.884553	0.644514	retina	zebrafish_NMDA_4hr	mouse_NMDA_6hr
0.654216	0.891719	0.882693	0.628296	retina	zebrafish_NMDA_4hr	mouse_NMDA_3hr
0.453754	0.804227	0.798473	0.554633	retina	zebrafish_NMDA_4hr	Macosko
0.666432	0.925133	0.90548	0.581635	retina	zebrafish_LD_Adult	mouse_LD_P60
0.767366	0.820311	0.824432	0.61121	retina	zebrafish_LD_Adult	mouse_LD_24hr
0.585607	0.880724	0.864856	0.578532	retina	zebrafish_LD_Adult	mouse_LD_10hr
0.628652	0.883031	0.869425	0.619504	retina	zebrafish_LD_Adult	mouse_LD_4hr
0.6428	0.873668	0.866819	0.579132	retina	zebrafish_LD_Adult	mouse_LD_0hr
0.61915	0.887632	0.863551	0.610055	retina	zebrafish_LD_Adult	mouse_NMDA_P60
0.524175	0.893471	0.881899	0.614708	retina	zebrafish_LD_Adult	mouse_NMDA_72hr
0.705408	0.94093	0.939102	0.680404	retina	zebrafish_LD_Adult	mouse_NMDA_48hr
0.463999	0.774353	0.788303	0.70694	retina	zebrafish_LD_Adult	mouse_NMDA_36hr
0.782281	0.907643	0.91464	0.64854	retina	zebrafish_LD_Adult	mouse_NMDA_24hr
0.671455	0.930696	0.938462	0.713809	retina	zebrafish_LD_Adult	mouse_NMDA_12hr
0.729901	0.931051	0.913415	0.660213	retina	zebrafish_LD_Adult	mouse_NMDA_6hr
0.65542	0.888759	0.879602	0.639818	retina	zebrafish_LD_Adult	mouse_NMDA_3hr
0.530344	0.891379	0.89917	0.582696	retina	zebrafish_LD_Adult	Macosko
0.651051	0.847431	0.868642	0.586319	retina	zebrafish_LD_36hr	mouse_LD_P60
0.714804	0.919998	0.91127	0.658996	retina	zebrafish_LD_36hr	mouse_LD_24hr
0.573913	0.497908	0.458641	0.569445	retina	zebrafish_LD_36hr	mouse_LD_10hr
0.574039	0.653472	0.662896	0.570837	retina	zebrafish_LD_36hr	mouse_LD_4hr
0.730989	0.924172	0.922165	0.608739	retina	zebrafish_LD_36hr	mouse_LD_0hr
0.576055	0.83832	0.851502	0.635867	retina	zebrafish_LD_36hr	mouse_NMDA_P60
0.561304	0.599029	0.644925	0.633574	retina	zebrafish_LD_36hr	mouse_NMDA_72hr
0.672853	0.824342	0.850838	0.665374	retina	zebrafish_LD_36hr	mouse_NMDA_48hr
0.473466	0.569128	0.569612	0.661862	retina	zebrafish_LD_36hr	mouse_NMDA_36hr
0.74008	0.896726	0.897949	0.641862	retina	zebrafish_LD_36hr	mouse_NMDA_24hr
0.735665	0.963769	0.96213	0.709377	retina	zebrafish_LD_36hr	mouse_NMDA_12hr
0.631598	0.876382	0.874879	0.647302	retina	zebrafish_LD_36hr	mouse_NMDA_6hr
0.584953	0.84919	0.841575	0.617211	retina	zebrafish_LD_36hr	mouse_NMDA_3hr
0.485379	0.837465	0.855071	0.517744	retina	zebrafish_LD_36hr	Macosko
0.632127	0.810631	0.807354	0.514069	retina	zebrafish_LD_20hr	mouse_LD_P60
0.749346	0.802685	0.807611	0.596781	retina	zebrafish_LD_20hr	mouse_LD_24hr
0.570284	0.737864	0.749176	0.521086	retina	zebrafish_LD_20hr	mouse_LD_10hr
0.491459	0.663319	0.649968	0.522006	retina	zebrafish_LD_20hr	mouse_LD_4hr
0.598303	0.766464	0.769569	0.523164	retina	zebrafish_LD_20hr	mouse_LD_0hr
0.489937	0.701652	0.718101	0.556235	retina	zebrafish_LD_20hr	mouse_NMDA_P60
0.60593	0.815784	0.822848	0.559529	retina	zebrafish_LD_20hr	mouse_NMDA_72hr
0.604423	0.785572	0.804394	0.61386	retina	zebrafish_LD_20hr	mouse_NMDA_48hr
0.552462	0.694382	0.740623	0.682098	retina	zebrafish_LD_20hr	mouse_NMDA_36hr
0.626593	0.766248	0.780401	0.591828	retina	zebrafish_LD_20hr	mouse_NMDA_24hr
0.60483	0.798821	0.812308	0.642677	retina	zebrafish_LD_20hr	mouse_NMDA_12hr
0.60697	0.662918	0.662206	0.615883	retina	zebrafish_LD_20hr	mouse_NMDA_6hr
0.792111	0.874506	0.879602	0.630405	retina	zebrafish_LD_20hr	mouse_NMDA_3hr
0.565982	0.90917	0.905106	0.541977	retina	zebrafish_LD_20hr	Macosko
0.563388	0.799541	0.793852	0.527777	retina	zebrafish_LD_10hr	mouse_LD_P60
0.55483	0.686346	0.684188	0.582032	retina	zebrafish_LD_10hr	mouse_LD_24hr
0.584065	0.793602	0.798148	0.553211	retina	zebrafish_LD_10hr	mouse_LD_10hr
0.576372	0.759282	0.753717	0.554233	retina	zebrafish_LD_10hr	mouse_LD_4hr
0.517525	0.685625	0.694457	0.490394	retina	zebrafish_LD_10hr	mouse_LD_0hr
0.539969	0.781617	0.768326	0.577747	retina	zebrafish_LD_10hr	mouse_NMDA_P60
0.443874	0.869752	0.861443	0.589551	retina	zebrafish_LD_10hr	mouse_NMDA_72hr
0.63629	0.7799	0.797071	0.616468	retina	zebrafish_LD_10hr	mouse_NMDA_48hr
0.557914	0.628549	0.658614	0.664093	retina	zebrafish_LD_10hr	mouse_NMDA_36hr
0.688925	0.905789	0.884835	0.610012	retina	zebrafish_LD_10hr	mouse_NMDA_24hr
0.582777	0.703499	0.734438	0.64516	retina	zebrafish_LD_10hr	mouse_NMDA_12hr
0.607584	0.68715	0.689133	0.594401	retina	zebrafish_LD_10hr	mouse_NMDA_6hr
0.572092	0.80023	0.801263	0.612873	retina	zebrafish_LD_10hr	mouse_NMDA_3hr
0.507192	0.890892	0.886471	0.532255	retina	zebrafish_LD_10hr	Macosko
0.647574	0.761229	0.751573	0.48321	retina	zebrafish_LD_4hr	mouse_LD_P60
0.543087	0.707441	0.703532	0.594962	retina	zebrafish_LD_4hr	mouse_LD_24hr
0.605941	0.574149	0.548109	0.487154	retina	zebrafish_LD_4hr	mouse_LD_10hr
0.524993	0.659951	0.636716	0.512743	retina	zebrafish_LD_4hr	mouse_LD_4hr
0.652839	0.863415	0.85698	0.570187	retina	zebrafish_LD_4hr	mouse_LD_0hr
0.578121	0.731915	0.69444	0.551268	retina	zebrafish_LD_4hr	mouse_NMDA_P60
0.611527	0.690357	0.68352	0.547964	retina	zebrafish_LD_4hr	mouse_NMDA_72hr
0.529381	0.532474	0.532858	0.590575	retina	zebrafish_LD_4hr	mouse_NMDA_48hr
0.634112	0.820722	0.821996	0.618631	retina	zebrafish_LD_4hr	mouse_NMDA_36hr
0.507442	0.796643	0.785408	0.593168	retina	zebrafish_LD_4hr	mouse_NMDA_24hr
0.60712	0.860896	0.861302	0.621614	retina	zebrafish_LD_4hr	mouse_NMDA_12hr
0.665732	0.862258	0.845856	0.588868	retina	zebrafish_LD_4hr	mouse_NMDA_6hr
0.608517	0.660796	0.673475	0.594334	retina	zebrafish_LD_4hr	mouse_NMDA_3hr
0.567322	0.774153	0.772585	0.52617	retina	zebrafish_LD_4hr	Macosko
0.27308	0.726692	0.692018	0.50434	retina	zebrafish_TNFa_Adult	chick_P10
0.288407	0.705774	0.642883	0.576109	retina	zebrafish_TNFa_72hr	chick_P10
0.312158	0.708388	0.645633	0.586241	retina	zebrafish_TNFa_36hr	chick_P10
0.337543	0.495665	0.551632	0.572298	retina	zebrafish_TNFa_20hr	chick_P10
0.326886	0.679054	0.629785	0.554178	retina	zebrafish_TNFa_10hr	chick_P10
0.561306	0.894277	0.902308	0.664783	retina	zebrafish_NMDA_Adult	chick_P10
0.317214	0.730844	0.66423	0.511499	retina	zebrafish_NMDA_36hr	chick_P10
0.440648	0.805302	0.78696	0.565704	retina	zebrafish_NMDA_20hr	chick_P10
0.440855	0.832296	0.843404	0.594906	retina	zebrafish_NMDA_10hr	chick_P10
0.366225	0.754676	0.708445	0.617089	retina	zebrafish_NMDA_4hr	chick_P10
0.390093	0.795694	0.766119	0.570203	retina	zebrafish_LD_Adult	chick_P10
0.360966	0.733371	0.660757	0.554678	retina	zebrafish_LD_36hr	chick_P10
0.345183	0.70635	0.703235	0.557395	retina	zebrafish_LD_20hr	chick_P10
0.470088	0.879523	0.876909	0.600774	retina	zebrafish_LD_10hr	chick_P10
0.405546	0.745863	0.684131	0.574915	retina	zebrafish_LD_4hr	chick_P10
0.589016	0.892323	0.882442	0.746313	pancreas	panc8	FACS
0.595259	0.958329	0.955992	0.786134	pancreas	panc8	Baron_mouse
0.613847	0.895787	0.869631	0.758804	pancreas	Baron_human	FACS
0.656681	0.962493	0.955461	0.785858	pancreas	Baron_human	Baron_mouse
0.529616	0.942947	0.941533	0.767528	pancreas	FACS	Baron_human
0.605699	0.904242	0.864278	0.748737	pancreas	Baron_mouse	Baron_human
0.18604	0.581423	0.600144	0.687711	kidney	Wang_Kidney	Quake_10x_Kidney
0.320592	0.517988	0.49235	0.679563	kidney	Wang_Kidney	Adam
0.155279	0.593495	0.643205	0.472473	kidney	Wang_Kidney	Park
0.161426	0.11946	0.120195	0.44594	kidney	Wang_Kidney	Karaiskos_mouse
0.239101	0.689839	0.669184	0.676999	kidney	Young	Quake_10x_Kidney
0.180731	0.364851	0.328962	0.622089	kidney	Young	Adam
0.122002	0.696842	0.67114	0.472689	kidney	Young	Park
0.174259	0.8133	0.820828	0.532434	kidney	Young	Karaiskos_mouse
0.242023	0.774464	0.75836	0.731517	kidney	Wu_human	Quake_10x_Kidney
0.272346	0.480638	0.449727	0.627582	kidney	Wu_human	Adam
0.255721	0.842491	0.834084	0.54841	kidney	Wu_human	Park
0.351476	0.930045	0.935927	0.553929	kidney	Wu_human	Karaiskos_mouse
0.155664	0.569773	0.569579	0.664484	kidney	Hochane	Quake_10x_Kidney
0.255516	0.449431	0.397541	0.655797	kidney	Hochane	Adam
0.0909315	0.557632	0.566899	0.399355	kidney	Hochane	Park
0.446585	0.856283	0.861664	0.538961	kidney	Hochane	Karaiskos_mouse
0.0826962	0.123123	0.102063	0.360447	kidney	Quake_10x_Kidney	Wang_Kidney
0.257686	0.472464	0.403694	0.58982	kidney	Quake_10x_Kidney	Young
0.250651	0.59511	0.599349	0.605448	kidney	Quake_10x_Kidney	Wu_human
0.163397	0.517074	0.370396	0.41256	kidney	Quake_10x_Kidney	Hochane
0.178648	0.39552	0.313559	0.405885	kidney	Adam	Wang_Kidney
0.163213	0.369577	0.33949	0.624077	kidney	Adam	Young
0.321816	0.76317	0.724523	0.688073	kidney	Adam	Wu_human
0.329437	0.734478	0.691428	0.653728	kidney	Adam	Hochane
0.0624947	0.160394	0.101695	0.362655	kidney	Park	Wang_Kidney
0.16966	0.344275	0.310642	0.548721	kidney	Park	Young
0.325112	0.706334	0.698464	0.738381	kidney	Park	Wu_human
0.0992135	0.523158	0.466178	0.556722	kidney	Park	Hochane
0.168622	0.236955	0.205601	0.393207	kidney	Karaiskos_mouse	Wang_Kidney
0.156396	0.187804	0.131398	0.555414	kidney	Karaiskos_mouse	Young
0.184448	0.167199	0.128199	0.445907	kidney	Karaiskos_mouse	Wu_human
0.312715	0.50465	0.445228	0.557153	kidney	Karaiskos_mouse	Hochane

## Sheet: Seurat
Supplemental Table 2b. Annotation metrics and CAMUS scores for Seurat on cross-species data pairs.
Seurat_f1_macro	Seurat_f1_weight	Seurat_ACC	CAMUS_score	tissue	reference	query
0.455883	0.97979	0.97974	0.483183	brain	Lake_2018	Tasic18
0.491548	0.850507	0.845634	0.79957	brain	Lake_2018	Quake_Smart-seq2_Brain_Non-Myeloid
0.359736	0.610721	0.5418	0.502776	brain	Lake_2018	Campbell
0.442458	0.776172	0.749855	0.719685	brain	Lake_2018	Chen
0.481261	0.73713	0.748746	0.588724	brain	Lake_2018	Tosches_lizard
0.255856	0.354326	0.383198	0.511668	brain	Lake_2018	Tosches_turtle
0.298317	0.727308	0.667545	0.35216	brain	Tasic18	Lake_2018
0.35863	0.625286	0.531185	0.248408	brain	Quake_Smart-seq2_Brain_Non-Myeloid	Lake_2018
0.339745	0.554407	0.553629	0.345218	brain	Campbell	Lake_2018
0.281704	0.42195	0.365326	0.264468	brain	Chen	Lake_2018
0.280323	0.562295	0.554096	0.477713	brain	Tasic18	Tosches_lizard
0.337029	0.73036	0.689515	0.482658	brain	Quake_Smart-seq2_Brain_Non-Myeloid	Tosches_lizard
0.297584	0.742462	0.747313	0.666961	brain	Campbell	Tosches_lizard
0.390332	0.714486	0.734177	0.624944	brain	Chen	Tosches_lizard
0.193763	0.521507	0.565634	0.484872	brain	Tasic18	Tosches_turtle
0.219319	0.718246	0.707726	0.507584	brain	Quake_Smart-seq2_Brain_Non-Myeloid	Tosches_turtle
0.206278	0.771073	0.75075	0.619086	brain	Campbell	Tosches_turtle
0.258974	0.564469	0.559098	0.595623	brain	Chen	Tosches_turtle
0.503405	0.796018	0.748449	0.431223	brain	Tosches_lizard	Lake_2018
0.307208	0.626014	0.468277	0.187541	brain	Tosches_lizard	Tasic18
0.503448	0.85749	0.865334	0.785418	brain	Tosches_lizard	Quake_Smart-seq2_Brain_Non-Myeloid
0.40883	0.726645	0.715453	0.496015	brain	Tosches_lizard	Campbell
0.489525	0.867028	0.849533	0.773822	brain	Tosches_lizard	Chen
0.826203	0.976723	0.976372	0.732798	brain	Tosches_lizard	Tosches_turtle
0.332306	0.605761	0.590666	0.370859	brain	Tosches_turtle	Lake_2018
0.297907	0.962745	0.958486	0.458484	brain	Tosches_turtle	Tasic18
0.417527	0.674809	0.650691	0.65179	brain	Tosches_turtle	Quake_Smart-seq2_Brain_Non-Myeloid
0.263788	0.800486	0.715262	0.515057	brain	Tosches_turtle	Campbell
0.343082	0.809401	0.750517	0.716777	brain	Tosches_turtle	Chen
0.774252	0.924137	0.9262	0.756465	brain	Tosches_turtle	Tosches_lizard
0.377712	0.747103	0.711206	0.578019	testis	testis_human	testis_mouse
0.802064	0.872996	0.867572	0.656257	testis	testis_human	testis_monkey
0.359692	0.690755	0.651153	0.624993	testis	testis_mouse	testis_human
0.43841	0.814152	0.810142	0.660581	testis	testis_mouse	testis_monkey
0.787398	0.826929	0.829732	0.721956	testis	testis_monkey	testis_human
0.296165	0.609942	0.590107	0.553069	testis	testis_monkey	testis_mouse
0.520447	0.937064	0.910986	0.585885	retina	Menon_microfluidics	mouse_LD_P60
0.568656	0.881872	0.866064	0.63071	retina	Menon_microfluidics	mouse_LD_24hr
0.501123	0.872668	0.851044	0.575762	retina	Menon_microfluidics	mouse_LD_10hr
0.516198	0.889069	0.869748	0.632392	retina	Menon_microfluidics	mouse_LD_4hr
0.505688	0.875429	0.855662	0.569844	retina	Menon_microfluidics	mouse_LD_0hr
0.51293	0.930524	0.903179	0.642117	retina	Menon_microfluidics	mouse_NMDA_P60
0.546987	0.946562	0.925897	0.65425	retina	Menon_microfluidics	mouse_NMDA_72hr
0.516498	0.948756	0.927732	0.681207	retina	Menon_microfluidics	mouse_NMDA_48hr
0.559242	0.945989	0.918627	0.695647	retina	Menon_microfluidics	mouse_NMDA_36hr
0.540778	0.952588	0.924416	0.654949	retina	Menon_microfluidics	mouse_NMDA_24hr
0.551565	0.959739	0.938935	0.691741	retina	Menon_microfluidics	mouse_NMDA_12hr
0.531387	0.934452	0.901	0.658827	retina	Menon_microfluidics	mouse_NMDA_6hr
0.536865	0.89712	0.875974	0.615527	retina	Menon_microfluidics	mouse_NMDA_3hr
0.629166	0.942136	0.927334	0.571646	retina	Menon_microfluidics	Macosko
0.587287	0.865916	0.87441	0.592542	retina	Menon_seqwell	mouse_LD_P60
0.701976	0.867108	0.87111	0.622964	retina	Menon_seqwell	mouse_LD_24hr
0.639023	0.913134	0.903469	0.617919	retina	Menon_seqwell	mouse_LD_10hr
0.653501	0.894682	0.890433	0.632872	retina	Menon_seqwell	mouse_LD_4hr
0.62099	0.869356	0.869279	0.581204	retina	Menon_seqwell	mouse_LD_0hr
0.567979	0.839069	0.854115	0.641203	retina	Menon_seqwell	mouse_NMDA_P60
0.616234	0.893442	0.9066	0.651471	retina	Menon_seqwell	mouse_NMDA_72hr
0.637262	0.937901	0.938138	0.681578	retina	Menon_seqwell	mouse_NMDA_48hr
0.629364	0.939331	0.933884	0.679393	retina	Menon_seqwell	mouse_NMDA_36hr
0.612997	0.891617	0.893658	0.642225	retina	Menon_seqwell	mouse_NMDA_24hr
0.591389	0.948607	0.948402	0.686883	retina	Menon_seqwell	mouse_NMDA_12hr
0.641275	0.914911	0.921477	0.699269	retina	Menon_seqwell	mouse_NMDA_6hr
0.623834	0.887497	0.884171	0.641524	retina	Menon_seqwell	mouse_NMDA_3hr
0.64556	0.873496	0.889484	0.552773	retina	Menon_seqwell	Macosko
0.319947	0.732219	0.742384	0.543082	retina	Menon_microfluidics	chick_P10
0.313628	0.460673	0.503654	0.405103	retina	Menon_seqwell	chick_P10
0.274728	0.355174	0.371876	0.288064	retina	Menon_microfluidics	zebrafish_TNFa_Adult
0.259693	0.566156	0.522633	0.386373	retina	Menon_microfluidics	zebrafish_TNFa_72hr
0.282389	0.575848	0.537247	0.376107	retina	Menon_microfluidics	zebrafish_TNFa_36hr
0.356138	0.514435	0.511404	0.398153	retina	Menon_microfluidics	zebrafish_TNFa_20hr
0.309272	0.501815	0.489712	0.398906	retina	Menon_microfluidics	zebrafish_TNFa_10hr
0.304526	0.423	0.423813	0.288064	retina	Menon_microfluidics	zebrafish_NMDA_Adult
0.298089	0.603026	0.569906	0.423889	retina	Menon_microfluidics	zebrafish_NMDA_36hr
0.254393	0.365829	0.37519	0.368459	retina	Menon_microfluidics	zebrafish_NMDA_20hr
0.281584	0.422225	0.379945	0.305423	retina	Menon_microfluidics	zebrafish_NMDA_10hr
0.298555	0.423518	0.411128	0.309436	retina	Menon_microfluidics	zebrafish_NMDA_4hr
0.290367	0.405065	0.410572	0.288064	retina	Menon_microfluidics	zebrafish_LD_Adult
0.21283	0.396302	0.414318	0.301401	retina	Menon_microfluidics	zebrafish_LD_36hr
0.287024	0.525625	0.462854	0.292164	retina	Menon_microfluidics	zebrafish_LD_20hr
0.262977	0.498057	0.43628	0.298878	retina	Menon_microfluidics	zebrafish_LD_10hr
0.270241	0.40373	0.399424	0.329985	retina	Menon_microfluidics	zebrafish_LD_4hr
0.220942	0.281447	0.237208	0.226277	retina	Menon_seqwell	zebrafish_TNFa_Adult
0.158417	0.312548	0.252301	0.321663	retina	Menon_seqwell	zebrafish_TNFa_72hr
0.169409	0.315407	0.25666	0.274944	retina	Menon_seqwell	zebrafish_TNFa_36hr
0.214203	0.269188	0.23142	0.286531	retina	Menon_seqwell	zebrafish_TNFa_20hr
0.209553	0.292269	0.243423	0.289378	retina	Menon_seqwell	zebrafish_TNFa_10hr
0.249182	0.314391	0.272363	0.226277	retina	Menon_seqwell	zebrafish_NMDA_Adult
0.202121	0.420339	0.318047	0.338535	retina	Menon_seqwell	zebrafish_NMDA_36hr
0.156444	0.284727	0.216163	0.318911	retina	Menon_seqwell	zebrafish_NMDA_20hr
0.299012	0.458672	0.387349	0.324061	retina	Menon_seqwell	zebrafish_NMDA_10hr
0.226748	0.369668	0.299986	0.275673	retina	Menon_seqwell	zebrafish_NMDA_4hr
0.248416	0.310029	0.27729	0.226277	retina	Menon_seqwell	zebrafish_LD_Adult
0.141427	0.158906	0.152705	0.248117	retina	Menon_seqwell	zebrafish_LD_36hr
0.2053	0.296384	0.245873	0.234822	retina	Menon_seqwell	zebrafish_LD_20hr
0.169564	0.293491	0.21527	0.212452	retina	Menon_seqwell	zebrafish_LD_10hr
0.245466	0.349954	0.298993	0.373823	retina	Menon_seqwell	zebrafish_LD_4hr
0.558925	0.841029	0.8351	0.652835	retina	mouse_LD_P60	Menon_microfluidics
0.655697	0.882252	0.878387	0.639992	retina	mouse_LD_P60	Menon_seqwell
0.69236	0.938644	0.904783	0.677714	retina	mouse_LD_24hr	Menon_microfluidics
0.690307	0.849903	0.847291	0.611157	retina	mouse_LD_24hr	Menon_seqwell
0.598333	0.810077	0.790951	0.559106	retina	mouse_LD_10hr	Menon_microfluidics
0.711116	0.846446	0.845443	0.60575	retina	mouse_LD_10hr	Menon_seqwell
0.63823	0.864758	0.836394	0.568612	retina	mouse_LD_4hr	Menon_microfluidics
0.700386	0.829989	0.828202	0.61047	retina	mouse_LD_4hr	Menon_seqwell
0.585344	0.840892	0.82629	0.576244	retina	mouse_LD_0hr	Menon_microfluidics
0.653856	0.863133	0.863916	0.627734	retina	mouse_LD_0hr	Menon_seqwell
0.567444	0.905326	0.872978	0.637183	retina	mouse_NMDA_P60	Menon_microfluidics
0.623386	0.853368	0.846983	0.61208	retina	mouse_NMDA_P60	Menon_seqwell
0.671997	0.888667	0.858046	0.589133	retina	mouse_NMDA_72hr	Menon_microfluidics
0.671308	0.834775	0.834052	0.6023	retina	mouse_NMDA_72hr	Menon_seqwell
0.571039	0.852659	0.828381	0.543994	retina	mouse_NMDA_48hr	Menon_microfluidics
0.66228	0.825585	0.824815	0.596771	retina	mouse_NMDA_48hr	Menon_seqwell
0.524434	0.845385	0.809965	0.52009	retina	mouse_NMDA_36hr	Menon_microfluidics
0.463172	0.697327	0.629002	0.566022	retina	mouse_NMDA_36hr	Menon_seqwell
0.571573	0.833142	0.801752	0.514631	retina	mouse_NMDA_24hr	Menon_microfluidics
0.580574	0.764525	0.788793	0.60253	retina	mouse_NMDA_24hr	Menon_seqwell
0.562079	0.778568	0.741775	0.443081	retina	mouse_NMDA_12hr	Menon_microfluidics
0.542785	0.732196	0.747537	0.56804	retina	mouse_NMDA_12hr	Menon_seqwell
0.557134	0.766043	0.74949	0.522072	retina	mouse_NMDA_6hr	Menon_microfluidics
0.653668	0.831336	0.850369	0.623672	retina	mouse_NMDA_6hr	Menon_seqwell
0.598755	0.839187	0.814494	0.54506	retina	mouse_NMDA_3hr	Menon_microfluidics
0.666741	0.90312	0.898399	0.649123	retina	mouse_NMDA_3hr	Menon_seqwell
0.661614	0.799338	0.768951	0.507584	retina	Macosko	Menon_microfluidics
0.669013	0.909156	0.904865	0.658676	retina	Macosko	Menon_seqwell
0.425826	0.820348	0.84022	0.601358	retina	mouse_LD_P60	chick_P10
0.535628	0.862311	0.86135	0.596885	retina	mouse_LD_24hr	chick_P10
0.529569	0.704641	0.750561	0.568448	retina	mouse_LD_10hr	chick_P10
0.540408	0.780637	0.791012	0.538191	retina	mouse_LD_4hr	chick_P10
0.474258	0.88221	0.877198	0.598664	retina	mouse_LD_0hr	chick_P10
0.455042	0.832125	0.842101	0.587001	retina	mouse_NMDA_P60	chick_P10
0.573336	0.85094	0.848252	0.563812	retina	mouse_NMDA_72hr	chick_P10
0.437804	0.686209	0.7337	0.485388	retina	mouse_NMDA_48hr	chick_P10
0.30351	0.526306	0.585571	0.422904	retina	mouse_NMDA_36hr	chick_P10
0.369703	0.718942	0.752153	0.53124	retina	mouse_NMDA_24hr	chick_P10
0.412184	0.668316	0.694696	0.483036	retina	mouse_NMDA_12hr	chick_P10
0.396224	0.488171	0.549533	0.508069	retina	mouse_NMDA_6hr	chick_P10
0.393285	0.62125	0.695781	0.52943	retina	mouse_NMDA_3hr	chick_P10
0.443133	0.828324	0.843404	0.583821	retina	Macosko	chick_P10
0.418411	0.539996	0.535027	0.36365	retina	mouse_LD_P60	zebrafish_TNFa_Adult
0.431081	0.632655	0.628042	0.467785	retina	mouse_LD_P60	zebrafish_TNFa_72hr
0.420348	0.599198	0.593396	0.445086	retina	mouse_LD_P60	zebrafish_TNFa_36hr
0.389344	0.599993	0.585726	0.432346	retina	mouse_LD_P60	zebrafish_TNFa_20hr
0.44238	0.624749	0.609274	0.47572	retina	mouse_LD_P60	zebrafish_TNFa_10hr
0.432426	0.592802	0.58137	0.36365	retina	mouse_LD_P60	zebrafish_NMDA_Adult
0.442041	0.608626	0.628161	0.517935	retina	mouse_LD_P60	zebrafish_NMDA_36hr
0.442572	0.566551	0.611123	0.523451	retina	mouse_LD_P60	zebrafish_NMDA_20hr
0.368133	0.446088	0.461815	0.386851	retina	mouse_LD_P60	zebrafish_NMDA_10hr
0.462355	0.567493	0.558143	0.422184	retina	mouse_LD_P60	zebrafish_NMDA_4hr
0.435972	0.581479	0.568078	0.36365	retina	mouse_LD_P60	zebrafish_LD_Adult
0.321545	0.396063	0.446038	0.344557	retina	mouse_LD_P60	zebrafish_LD_36hr
0.381397	0.598356	0.562353	0.403676	retina	mouse_LD_P60	zebrafish_LD_20hr
0.319721	0.378327	0.386146	0.315391	retina	mouse_LD_P60	zebrafish_LD_10hr
0.482515	0.623297	0.613237	0.467306	retina	mouse_LD_P60	zebrafish_LD_4hr
0.427759	0.5728	0.565563	0.370806	retina	mouse_LD_24hr	zebrafish_TNFa_Adult
0.420296	0.614183	0.614298	0.42345	retina	mouse_LD_24hr	zebrafish_TNFa_72hr
0.394483	0.650905	0.629446	0.430453	retina	mouse_LD_24hr	zebrafish_TNFa_36hr
0.49086	0.668093	0.658671	0.485328	retina	mouse_LD_24hr	zebrafish_TNFa_20hr
0.469803	0.687905	0.662299	0.500375	retina	mouse_LD_24hr	zebrafish_TNFa_10hr
0.450975	0.622256	0.604978	0.370806	retina	mouse_LD_24hr	zebrafish_NMDA_Adult
0.508395	0.724788	0.716658	0.490044	retina	mouse_LD_24hr	zebrafish_NMDA_36hr
0.497222	0.6806	0.687161	0.510501	retina	mouse_LD_24hr	zebrafish_NMDA_20hr
0.471896	0.6097	0.5989	0.42512	retina	mouse_LD_24hr	zebrafish_NMDA_10hr
0.48091	0.637966	0.606335	0.435332	retina	mouse_LD_24hr	zebrafish_NMDA_4hr
0.440368	0.606649	0.586554	0.370806	retina	mouse_LD_24hr	zebrafish_LD_Adult
0.326914	0.666756	0.650103	0.328907	retina	mouse_LD_24hr	zebrafish_LD_36hr
0.399031	0.613953	0.585643	0.408394	retina	mouse_LD_24hr	zebrafish_LD_20hr
0.406809	0.577822	0.547646	0.387637	retina	mouse_LD_24hr	zebrafish_LD_10hr
0.490671	0.623392	0.610935	0.478547	retina	mouse_LD_24hr	zebrafish_LD_4hr
0.433191	0.472439	0.477496	0.32653	retina	mouse_LD_10hr	zebrafish_TNFa_Adult
0.427745	0.554839	0.554785	0.413078	retina	mouse_LD_10hr	zebrafish_TNFa_72hr
0.423193	0.530101	0.525921	0.365556	retina	mouse_LD_10hr	zebrafish_TNFa_36hr
0.519815	0.641131	0.6337	0.458038	retina	mouse_LD_10hr	zebrafish_TNFa_20hr
0.513215	0.636667	0.624219	0.461322	retina	mouse_LD_10hr	zebrafish_TNFa_10hr
0.452519	0.549112	0.538312	0.32653	retina	mouse_LD_10hr	zebrafish_NMDA_Adult
0.434359	0.536748	0.567675	0.488367	retina	mouse_LD_10hr	zebrafish_NMDA_36hr
0.513809	0.600109	0.6335	0.486332	retina	mouse_LD_10hr	zebrafish_NMDA_20hr
0.460488	0.562232	0.564417	0.382066	retina	mouse_LD_10hr	zebrafish_NMDA_10hr
0.488102	0.61167	0.59713	0.426625	retina	mouse_LD_10hr	zebrafish_NMDA_4hr
0.451888	0.49627	0.507621	0.32653	retina	mouse_LD_10hr	zebrafish_LD_Adult
0.332115	0.305159	0.349308	0.331994	retina	mouse_LD_10hr	zebrafish_LD_36hr
0.389387	0.502079	0.495283	0.341632	retina	mouse_LD_10hr	zebrafish_LD_20hr
0.420473	0.532554	0.503827	0.323619	retina	mouse_LD_10hr	zebrafish_LD_10hr
0.529683	0.593983	0.606043	0.472307	retina	mouse_LD_10hr	zebrafish_LD_4hr
0.37168	0.362596	0.37747	0.291239	retina	mouse_LD_4hr	zebrafish_TNFa_Adult
0.430788	0.489345	0.517589	0.396573	retina	mouse_LD_4hr	zebrafish_TNFa_72hr
0.435195	0.522497	0.537566	0.398733	retina	mouse_LD_4hr	zebrafish_TNFa_36hr
0.490057	0.594109	0.592017	0.467845	retina	mouse_LD_4hr	zebrafish_TNFa_20hr
0.479399	0.58627	0.584502	0.45958	retina	mouse_LD_4hr	zebrafish_TNFa_10hr
0.381028	0.432976	0.428278	0.291239	retina	mouse_LD_4hr	zebrafish_NMDA_Adult
0.488814	0.674941	0.682945	0.535229	retina	mouse_LD_4hr	zebrafish_NMDA_36hr
0.508675	0.672844	0.680426	0.548937	retina	mouse_LD_4hr	zebrafish_NMDA_20hr
0.453379	0.593092	0.569917	0.426318	retina	mouse_LD_4hr	zebrafish_NMDA_10hr
0.441803	0.597254	0.561256	0.426962	retina	mouse_LD_4hr	zebrafish_NMDA_4hr
0.398961	0.483952	0.458661	0.291239	retina	mouse_LD_4hr	zebrafish_LD_Adult
0.323322	0.327076	0.323087	0.316285	retina	mouse_LD_4hr	zebrafish_LD_36hr
0.355574	0.500147	0.481132	0.361518	retina	mouse_LD_4hr	zebrafish_LD_20hr
0.389827	0.492415	0.481056	0.369147	retina	mouse_LD_4hr	zebrafish_LD_10hr
0.499811	0.594491	0.56777	0.453179	retina	mouse_LD_4hr	zebrafish_LD_4hr
0.466897	0.598672	0.582859	0.380073	retina	mouse_LD_0hr	zebrafish_TNFa_Adult
0.492523	0.640122	0.642542	0.456753	retina	mouse_LD_0hr	zebrafish_TNFa_72hr
0.441923	0.631984	0.628489	0.443488	retina	mouse_LD_0hr	zebrafish_TNFa_36hr
0.529227	0.696178	0.674794	0.487731	retina	mouse_LD_0hr	zebrafish_TNFa_20hr
0.528821	0.668135	0.654008	0.48662	retina	mouse_LD_0hr	zebrafish_TNFa_10hr
0.484483	0.637358	0.616423	0.380073	retina	mouse_LD_0hr	zebrafish_NMDA_Adult
0.493723	0.664333	0.675756	0.535146	retina	mouse_LD_0hr	zebrafish_NMDA_36hr
0.51949	0.67532	0.685423	0.530182	retina	mouse_LD_0hr	zebrafish_NMDA_20hr
0.460937	0.605574	0.600804	0.44183	retina	mouse_LD_0hr	zebrafish_NMDA_10hr
0.505683	0.633034	0.612833	0.450121	retina	mouse_LD_0hr	zebrafish_NMDA_4hr
0.472331	0.554705	0.555607	0.380073	retina	mouse_LD_0hr	zebrafish_LD_Adult
0.473512	0.551568	0.596288	0.427015	retina	mouse_LD_0hr	zebrafish_LD_36hr
0.460904	0.565362	0.565301	0.423713	retina	mouse_LD_0hr	zebrafish_LD_20hr
0.424458	0.507321	0.505358	0.359325	retina	mouse_LD_0hr	zebrafish_LD_10hr
0.525883	0.584306	0.592806	0.476984	retina	mouse_LD_0hr	zebrafish_LD_4hr
0.401668	0.500102	0.506338	0.349545	retina	mouse_NMDA_P60	zebrafish_TNFa_Adult
0.361833	0.54969	0.558315	0.415023	retina	mouse_NMDA_P60	zebrafish_TNFa_72hr
0.329997	0.503425	0.49992	0.384652	retina	mouse_NMDA_P60	zebrafish_TNFa_36hr
0.435668	0.585872	0.587888	0.437601	retina	mouse_NMDA_P60	zebrafish_TNFa_20hr
0.435294	0.577338	0.561368	0.452757	retina	mouse_NMDA_P60	zebrafish_TNFa_10hr
0.416995	0.569921	0.560226	0.349545	retina	mouse_NMDA_P60	zebrafish_NMDA_Adult
0.421076	0.624406	0.633614	0.526167	retina	mouse_NMDA_P60	zebrafish_NMDA_36hr
0.457824	0.561091	0.612427	0.515417	retina	mouse_NMDA_P60	zebrafish_NMDA_20hr
0.401318	0.534248	0.527607	0.402972	retina	mouse_NMDA_P60	zebrafish_NMDA_10hr
0.455277	0.596555	0.560579	0.426967	retina	mouse_NMDA_P60	zebrafish_NMDA_4hr
0.420529	0.570012	0.559764	0.349545	retina	mouse_NMDA_P60	zebrafish_LD_Adult
0.366257	0.579866	0.593833	0.395327	retina	mouse_NMDA_P60	zebrafish_LD_36hr
0.306993	0.325132	0.350973	0.344163	retina	mouse_NMDA_P60	zebrafish_LD_20hr
0.341489	0.364012	0.388634	0.311237	retina	mouse_NMDA_P60	zebrafish_LD_10hr
0.435076	0.589057	0.571799	0.427402	retina	mouse_NMDA_P60	zebrafish_LD_4hr
0.355939	0.461568	0.451989	0.325564	retina	mouse_NMDA_72hr	zebrafish_TNFa_Adult
0.359107	0.656291	0.596898	0.397484	retina	mouse_NMDA_72hr	zebrafish_TNFa_72hr
0.387797	0.631106	0.57569	0.3745	retina	mouse_NMDA_72hr	zebrafish_TNFa_36hr
0.351401	0.623743	0.570783	0.412906	retina	mouse_NMDA_72hr	zebrafish_TNFa_20hr
0.376013	0.535518	0.511311	0.428878	retina	mouse_NMDA_72hr	zebrafish_TNFa_10hr
0.370657	0.518007	0.499564	0.325564	retina	mouse_NMDA_72hr	zebrafish_NMDA_Adult
0.436268	0.732348	0.685424	0.486202	retina	mouse_NMDA_72hr	zebrafish_NMDA_36hr
0.395308	0.728739	0.689333	0.479136	retina	mouse_NMDA_72hr	zebrafish_NMDA_20hr
0.383938	0.597546	0.543051	0.419836	retina	mouse_NMDA_72hr	zebrafish_NMDA_10hr
0.400651	0.595568	0.543252	0.386202	retina	mouse_NMDA_72hr	zebrafish_NMDA_4hr
0.376404	0.527696	0.503464	0.325564	retina	mouse_NMDA_72hr	zebrafish_LD_Adult
0.264412	0.657404	0.561131	0.229785	retina	mouse_NMDA_72hr	zebrafish_LD_36hr
0.286111	0.563984	0.485112	0.298552	retina	mouse_NMDA_72hr	zebrafish_LD_20hr
0.312675	0.534126	0.46594	0.327527	retina	mouse_NMDA_72hr	zebrafish_LD_10hr
0.366209	0.510168	0.507338	0.396035	retina	mouse_NMDA_72hr	zebrafish_LD_4hr
0.240804	0.353397	0.322145	0.263179	retina	mouse_NMDA_48hr	zebrafish_TNFa_Adult
0.245662	0.415298	0.41798	0.36189	retina	mouse_NMDA_48hr	zebrafish_TNFa_72hr
0.302192	0.450903	0.448875	0.380447	retina	mouse_NMDA_48hr	zebrafish_TNFa_36hr
0.376482	0.463783	0.492922	0.378436	retina	mouse_NMDA_48hr	zebrafish_TNFa_20hr
0.325875	0.482037	0.485106	0.383877	retina	mouse_NMDA_48hr	zebrafish_TNFa_10hr
0.252156	0.415571	0.364947	0.263179	retina	mouse_NMDA_48hr	zebrafish_NMDA_Adult
0.353666	0.627603	0.608081	0.50547	retina	mouse_NMDA_48hr	zebrafish_NMDA_36hr
0.305585	0.560346	0.558983	0.511904	retina	mouse_NMDA_48hr	zebrafish_NMDA_20hr
0.33529	0.623778	0.562725	0.432334	retina	mouse_NMDA_48hr	zebrafish_NMDA_10hr
0.369749	0.602339	0.545553	0.387733	retina	mouse_NMDA_48hr	zebrafish_NMDA_4hr
0.261374	0.472986	0.413857	0.263179	retina	mouse_NMDA_48hr	zebrafish_LD_Adult
0.270857	0.52782	0.520475	0.323581	retina	mouse_NMDA_48hr	zebrafish_LD_36hr
0.293757	0.513562	0.47612	0.357061	retina	mouse_NMDA_48hr	zebrafish_LD_20hr
0.251342	0.469025	0.422694	0.321529	retina	mouse_NMDA_48hr	zebrafish_LD_10hr
0.288151	0.475195	0.427338	0.360038	retina	mouse_NMDA_48hr	zebrafish_LD_4hr
0.265225	0.313996	0.28232	0.202548	retina	mouse_NMDA_36hr	zebrafish_TNFa_Adult
0.265302	0.424253	0.409784	0.320079	retina	mouse_NMDA_36hr	zebrafish_TNFa_72hr
0.355308	0.478957	0.466263	0.348258	retina	mouse_NMDA_36hr	zebrafish_TNFa_36hr
0.352431	0.494687	0.479355	0.337954	retina	mouse_NMDA_36hr	zebrafish_TNFa_20hr
0.379687	0.426751	0.431876	0.33904	retina	mouse_NMDA_36hr	zebrafish_TNFa_10hr
0.27746	0.374619	0.325019	0.202548	retina	mouse_NMDA_36hr	zebrafish_NMDA_Adult
0.393251	0.588025	0.582796	0.475171	retina	mouse_NMDA_36hr	zebrafish_NMDA_36hr
0.38466	0.66313	0.635455	0.48026	retina	mouse_NMDA_36hr	zebrafish_NMDA_20hr
0.360554	0.578222	0.523588	0.38947	retina	mouse_NMDA_36hr	zebrafish_NMDA_10hr
0.314252	0.442814	0.39204	0.267795	retina	mouse_NMDA_36hr	zebrafish_NMDA_4hr
0.287524	0.427486	0.361919	0.202548	retina	mouse_NMDA_36hr	zebrafish_LD_Adult
0.306572	0.468721	0.447216	0.29484	retina	mouse_NMDA_36hr	zebrafish_LD_36hr
0.337154	0.497312	0.464917	0.324168	retina	mouse_NMDA_36hr	zebrafish_LD_20hr
0.268441	0.386601	0.357826	0.248666	retina	mouse_NMDA_36hr	zebrafish_LD_10hr
0.228725	0.368768	0.28518	0.24342	retina	mouse_NMDA_36hr	zebrafish_LD_4hr
0.398599	0.473868	0.445266	0.331082	retina	mouse_NMDA_24hr	zebrafish_TNFa_Adult
0.385072	0.580618	0.560081	0.422628	retina	mouse_NMDA_24hr	zebrafish_TNFa_72hr
0.351571	0.600051	0.565162	0.392219	retina	mouse_NMDA_24hr	zebrafish_TNFa_36hr
0.39073	0.612219	0.574912	0.43933	retina	mouse_NMDA_24hr	zebrafish_TNFa_20hr
0.404841	0.608478	0.56884	0.445404	retina	mouse_NMDA_24hr	zebrafish_TNFa_10hr
0.398793	0.51995	0.482576	0.331082	retina	mouse_NMDA_24hr	zebrafish_NMDA_Adult
0.476702	0.736527	0.723599	0.492762	retina	mouse_NMDA_24hr	zebrafish_NMDA_36hr
0.45013	0.698254	0.678688	0.485393	retina	mouse_NMDA_24hr	zebrafish_NMDA_20hr
0.422939	0.610558	0.569706	0.411894	retina	mouse_NMDA_24hr	zebrafish_NMDA_10hr
0.430902	0.582963	0.515365	0.414274	retina	mouse_NMDA_24hr	zebrafish_NMDA_4hr
0.432947	0.562933	0.521119	0.331082	retina	mouse_NMDA_24hr	zebrafish_LD_Adult
0.382114	0.671949	0.621624	0.314687	retina	mouse_NMDA_24hr	zebrafish_LD_36hr
0.353515	0.583476	0.524027	0.325263	retina	mouse_NMDA_24hr	zebrafish_LD_20hr
0.331947	0.592254	0.510524	0.360186	retina	mouse_NMDA_24hr	zebrafish_LD_10hr
0.40732	0.60244	0.542446	0.406885	retina	mouse_NMDA_24hr	zebrafish_LD_4hr
0.326986	0.348828	0.339338	0.270322	retina	mouse_NMDA_12hr	zebrafish_TNFa_Adult
0.331504	0.472399	0.457572	0.366744	retina	mouse_NMDA_12hr	zebrafish_TNFa_72hr
0.362902	0.470623	0.459244	0.352502	retina	mouse_NMDA_12hr	zebrafish_TNFa_36hr
0.372474	0.557517	0.512977	0.396397	retina	mouse_NMDA_12hr	zebrafish_TNFa_20hr
0.391174	0.532271	0.49872	0.398243	retina	mouse_NMDA_12hr	zebrafish_TNFa_10hr
0.330125	0.413139	0.38681	0.270322	retina	mouse_NMDA_12hr	zebrafish_NMDA_Adult
0.433605	0.695292	0.662618	0.470579	retina	mouse_NMDA_12hr	zebrafish_NMDA_36hr
0.328572	0.586807	0.5529	0.456664	retina	mouse_NMDA_12hr	zebrafish_NMDA_20hr
0.38137	0.596832	0.532685	0.426867	retina	mouse_NMDA_12hr	zebrafish_NMDA_10hr
0.421457	0.569877	0.502098	0.414433	retina	mouse_NMDA_12hr	zebrafish_NMDA_4hr
0.352984	0.478462	0.444958	0.270322	retina	mouse_NMDA_12hr	zebrafish_LD_Adult
0.35253	0.716071	0.640185	0.318852	retina	mouse_NMDA_12hr	zebrafish_LD_36hr
0.366386	0.553055	0.502358	0.330686	retina	mouse_NMDA_12hr	zebrafish_LD_20hr
0.317695	0.526818	0.459816	0.313028	retina	mouse_NMDA_12hr	zebrafish_LD_10hr
0.38755	0.55391	0.524604	0.36618	retina	mouse_NMDA_12hr	zebrafish_LD_4hr
0.363854	0.370411	0.388915	0.285444	retina	mouse_NMDA_6hr	zebrafish_TNFa_Adult
0.358738	0.484038	0.511663	0.394731	retina	mouse_NMDA_6hr	zebrafish_TNFa_72hr
0.361077	0.454139	0.487319	0.38294	retina	mouse_NMDA_6hr	zebrafish_TNFa_36hr
0.404307	0.505801	0.524577	0.401453	retina	mouse_NMDA_6hr	zebrafish_TNFa_20hr
0.325612	0.311884	0.339953	0.373308	retina	mouse_NMDA_6hr	zebrafish_TNFa_10hr
0.384313	0.442243	0.438594	0.285444	retina	mouse_NMDA_6hr	zebrafish_NMDA_Adult
0.427293	0.569418	0.59767	0.492531	retina	mouse_NMDA_6hr	zebrafish_NMDA_36hr
0.410704	0.556365	0.596133	0.512621	retina	mouse_NMDA_6hr	zebrafish_NMDA_20hr
0.423244	0.564351	0.559128	0.432139	retina	mouse_NMDA_6hr	zebrafish_NMDA_10hr
0.438356	0.60146	0.54623	0.434133	retina	mouse_NMDA_6hr	zebrafish_NMDA_4hr
0.390946	0.47291	0.451989	0.285444	retina	mouse_NMDA_6hr	zebrafish_LD_Adult
0.337784	0.540293	0.551606	0.369717	retina	mouse_NMDA_6hr	zebrafish_LD_36hr
0.36429	0.466318	0.477447	0.343071	retina	mouse_NMDA_6hr	zebrafish_LD_20hr
0.337559	0.496519	0.464217	0.336169	retina	mouse_NMDA_6hr	zebrafish_LD_10hr
0.417922	0.481148	0.498417	0.385192	retina	mouse_NMDA_6hr	zebrafish_LD_4hr
0.419929	0.475546	0.494586	0.34229	retina	mouse_NMDA_3hr	zebrafish_TNFa_Adult
0.457686	0.59605	0.620477	0.442669	retina	mouse_NMDA_3hr	zebrafish_TNFa_72hr
0.463949	0.543872	0.576009	0.430216	retina	mouse_NMDA_3hr	zebrafish_TNFa_36hr
0.498134	0.653402	0.648053	0.473484	retina	mouse_NMDA_3hr	zebrafish_TNFa_20hr
0.520047	0.661449	0.658102	0.493466	retina	mouse_NMDA_3hr	zebrafish_TNFa_10hr
0.435801	0.523391	0.538722	0.34229	retina	mouse_NMDA_3hr	zebrafish_NMDA_Adult
0.515604	0.603989	0.647744	0.539126	retina	mouse_NMDA_3hr	zebrafish_NMDA_36hr
0.504327	0.643035	0.672822	0.526662	retina	mouse_NMDA_3hr	zebrafish_NMDA_20hr
0.458322	0.57522	0.582399	0.432345	retina	mouse_NMDA_3hr	zebrafish_NMDA_10hr
0.510855	0.606955	0.604034	0.436471	retina	mouse_NMDA_3hr	zebrafish_NMDA_4hr
0.43901	0.504956	0.518245	0.34229	retina	mouse_NMDA_3hr	zebrafish_LD_Adult
0.409526	0.378414	0.465973	0.37632	retina	mouse_NMDA_3hr	zebrafish_LD_36hr
0.412821	0.521653	0.501769	0.380174	retina	mouse_NMDA_3hr	zebrafish_LD_20hr
0.368482	0.490527	0.466514	0.334085	retina	mouse_NMDA_3hr	zebrafish_LD_10hr
0.504407	0.632943	0.605755	0.462527	retina	mouse_NMDA_3hr	zebrafish_LD_4hr
0.401285	0.507402	0.53241	0.366393	retina	Macosko	zebrafish_TNFa_Adult
0.391261	0.575884	0.594629	0.47362	retina	Macosko	zebrafish_TNFa_72hr
0.414978	0.61211	0.624821	0.461339	retina	Macosko	zebrafish_TNFa_36hr
0.46949	0.643848	0.655328	0.498261	retina	Macosko	zebrafish_TNFa_20hr
0.435334	0.651092	0.652984	0.509622	retina	Macosko	zebrafish_TNFa_10hr
0.420344	0.55984	0.568078	0.366393	retina	Macosko	zebrafish_NMDA_Adult
0.50979	0.575829	0.615022	0.551456	retina	Macosko	zebrafish_NMDA_36hr
0.466237	0.616123	0.646318	0.541346	retina	Macosko	zebrafish_NMDA_20hr
0.430658	0.582672	0.57161	0.442109	retina	Macosko	zebrafish_NMDA_10hr
0.440196	0.586557	0.571545	0.439438	retina	Macosko	zebrafish_NMDA_4hr
0.421125	0.567745	0.570336	0.366393	retina	Macosko	zebrafish_LD_Adult
0.392517	0.501714	0.537955	0.414251	retina	Macosko	zebrafish_LD_36hr
0.352919	0.589304	0.56707	0.414755	retina	Macosko	zebrafish_LD_20hr
0.36284	0.475057	0.467088	0.33626	retina	Macosko	zebrafish_LD_10hr
0.418054	0.621196	0.589353	0.43303	retina	Macosko	zebrafish_LD_4hr
0.371526	0.873133	0.844259	0.571067	retina	chick_P10	Menon_microfluidics
0.369136	0.764601	0.758313	0.617071	retina	chick_P10	Menon_seqwell
0.403758	0.885421	0.880637	0.532315	retina	chick_P10	mouse_LD_P60
0.397229	0.682585	0.715517	0.538775	retina	chick_P10	mouse_LD_24hr
0.321725	0.70584	0.703186	0.525217	retina	chick_P10	mouse_LD_10hr
0.335193	0.63723	0.661926	0.508867	retina	chick_P10	mouse_LD_4hr
0.39887	0.862512	0.857419	0.538384	retina	chick_P10	mouse_LD_0hr
0.387916	0.821776	0.828858	0.572375	retina	chick_P10	mouse_NMDA_P60
0.409047	0.840685	0.840216	0.593305	retina	chick_P10	mouse_NMDA_72hr
0.342881	0.552192	0.554057	0.595718	retina	chick_P10	mouse_NMDA_48hr
0.311717	0.602051	0.600763	0.658027	retina	chick_P10	mouse_NMDA_36hr
0.394903	0.830369	0.846447	0.63328	retina	chick_P10	mouse_NMDA_24hr
0.34636	0.801757	0.782959	0.658106	retina	chick_P10	mouse_NMDA_12hr
0.353184	0.763894	0.751371	0.636242	retina	chick_P10	mouse_NMDA_6hr
0.329545	0.639123	0.64445	0.574361	retina	chick_P10	mouse_NMDA_3hr
0.407865	0.882985	0.886493	0.507781	retina	chick_P10	Macosko
0.233034	0.518648	0.491506	0.312024	retina	chick_P10	zebrafish_TNFa_Adult
0.156119	0.340121	0.260497	0.310024	retina	chick_P10	zebrafish_TNFa_72hr
0.173431	0.321081	0.272133	0.30577	retina	chick_P10	zebrafish_TNFa_36hr
0.208484	0.430198	0.384585	0.333667	retina	chick_P10	zebrafish_TNFa_20hr
0.194683	0.376128	0.315795	0.364324	retina	chick_P10	zebrafish_TNFa_10hr
0.241826	0.52873	0.498794	0.312024	retina	chick_P10	zebrafish_NMDA_Adult
0.193302	0.32027	0.266733	0.412425	retina	chick_P10	zebrafish_NMDA_36hr
0.186709	0.302464	0.250272	0.411568	retina	chick_P10	zebrafish_NMDA_20hr
0.177664	0.323249	0.281785	0.347948	retina	chick_P10	zebrafish_NMDA_10hr
0.191183	0.394127	0.336131	0.307573	retina	chick_P10	zebrafish_NMDA_4hr
0.224378	0.488262	0.460611	0.312024	retina	chick_P10	zebrafish_LD_Adult
0.107121	0.202686	0.148483	0.306618	retina	chick_P10	zebrafish_LD_36hr
0.123394	0.279698	0.218013	0.278657	retina	chick_P10	zebrafish_LD_20hr
0.16569	0.305651	0.262533	0.246292	retina	chick_P10	zebrafish_LD_10hr
0.229524	0.422523	0.399712	0.365271	retina	chick_P10	zebrafish_LD_4hr
0.249061	0.275941	0.275447	0.337696	retina	zebrafish_TNFa_Adult	Menon_microfluidics
0.352683	0.676917	0.627463	0.554318	retina	zebrafish_TNFa_Adult	Menon_seqwell
0.272675	0.285651	0.296999	0.351355	retina	zebrafish_TNFa_72hr	Menon_microfluidics
0.369035	0.532518	0.558805	0.548437	retina	zebrafish_TNFa_72hr	Menon_seqwell
0.223183	0.286578	0.262904	0.336387	retina	zebrafish_TNFa_36hr	Menon_microfluidics
0.33062	0.412621	0.434421	0.532539	retina	zebrafish_TNFa_36hr	Menon_seqwell
0.309679	0.30338	0.257827	0.289346	retina	zebrafish_TNFa_20hr	Menon_microfluidics
0.358476	0.46079	0.46952	0.542331	retina	zebrafish_TNFa_20hr	Menon_seqwell
0.212519	0.271479	0.221343	0.325693	retina	zebrafish_TNFa_10hr	Menon_microfluidics
0.289188	0.429318	0.421182	0.562166	retina	zebrafish_TNFa_10hr	Menon_seqwell
0.349744	0.712383	0.705241	0.399733	retina	zebrafish_NMDA_Adult	Menon_microfluidics
0.407723	0.793098	0.774938	0.571746	retina	zebrafish_NMDA_Adult	Menon_seqwell
0.363396	0.651629	0.659499	0.407684	retina	zebrafish_NMDA_36hr	Menon_microfluidics
0.393583	0.690936	0.689655	0.57532	retina	zebrafish_NMDA_36hr	Menon_seqwell
0.359771	0.630324	0.649296	0.453777	retina	zebrafish_NMDA_20hr	Menon_microfluidics
0.360865	0.562437	0.580665	0.578629	retina	zebrafish_NMDA_20hr	Menon_seqwell
0.305622	0.621571	0.557762	0.384039	retina	zebrafish_NMDA_10hr	Menon_microfluidics
0.33647	0.511379	0.539101	0.545935	retina	zebrafish_NMDA_10hr	Menon_seqwell
0.313293	0.580436	0.553482	0.414738	retina	zebrafish_NMDA_4hr	Menon_microfluidics
0.299622	0.31981	0.400862	0.495495	retina	zebrafish_NMDA_4hr	Menon_seqwell
0.291624	0.71628	0.663581	0.349559	retina	zebrafish_LD_Adult	Menon_microfluidics
0.433723	0.790142	0.76016	0.567395	retina	zebrafish_LD_Adult	Menon_seqwell
0.203193	0.105925	0.179434	0.26933	retina	zebrafish_LD_36hr	Menon_microfluidics
0.337197	0.561425	0.526478	0.39918	retina	zebrafish_LD_36hr	Menon_seqwell
0.238001	0.569636	0.50555	0.326049	retina	zebrafish_LD_20hr	Menon_microfluidics
0.345082	0.58422	0.611145	0.525213	retina	zebrafish_LD_20hr	Menon_seqwell
0.266878	0.596191	0.535713	0.304671	retina	zebrafish_LD_10hr	Menon_microfluidics
0.366871	0.640558	0.661022	0.593887	retina	zebrafish_LD_10hr	Menon_seqwell
0.162665	0.570957	0.466229	0.258164	retina	zebrafish_LD_4hr	Menon_microfluidics
0.296718	0.581563	0.55819	0.514388	retina	zebrafish_LD_4hr	Menon_seqwell
0.464753	0.593773	0.531004	0.350464	retina	zebrafish_TNFa_Adult	mouse_LD_P60
0.483558	0.583366	0.576325	0.413016	retina	zebrafish_TNFa_Adult	mouse_LD_24hr
0.401104	0.434023	0.411552	0.327681	retina	zebrafish_TNFa_Adult	mouse_LD_10hr
0.403257	0.450898	0.455721	0.39151	retina	zebrafish_TNFa_Adult	mouse_LD_4hr
0.515053	0.713972	0.692173	0.416251	retina	zebrafish_TNFa_Adult	mouse_LD_0hr
0.422901	0.624883	0.569749	0.401971	retina	zebrafish_TNFa_Adult	mouse_NMDA_P60
0.298261	0.563878	0.487071	0.44034	retina	zebrafish_TNFa_Adult	mouse_NMDA_72hr
0.365129	0.510783	0.474272	0.526356	retina	zebrafish_TNFa_Adult	mouse_NMDA_48hr
0.385419	0.310701	0.28417	0.507851	retina	zebrafish_TNFa_Adult	mouse_NMDA_36hr
0.440073	0.537074	0.46948	0.420164	retina	zebrafish_TNFa_Adult	mouse_NMDA_24hr
0.315878	0.421871	0.327101	0.434745	retina	zebrafish_TNFa_Adult	mouse_NMDA_12hr
0.425246	0.580381	0.502741	0.454762	retina	zebrafish_TNFa_Adult	mouse_NMDA_6hr
0.490342	0.622425	0.612739	0.463004	retina	zebrafish_TNFa_Adult	mouse_NMDA_3hr
0.382897	0.313479	0.241832	0.316081	retina	zebrafish_TNFa_Adult	Macosko
0.519631	0.607601	0.541164	0.377946	retina	zebrafish_TNFa_72hr	mouse_LD_P60
0.57307	0.652366	0.625736	0.443363	retina	zebrafish_TNFa_72hr	mouse_LD_24hr
0.460077	0.382627	0.373411	0.407947	retina	zebrafish_TNFa_72hr	mouse_LD_10hr
0.500383	0.588651	0.582741	0.451303	retina	zebrafish_TNFa_72hr	mouse_LD_4hr
0.52439	0.607996	0.58113	0.392332	retina	zebrafish_TNFa_72hr	mouse_LD_0hr
0.469719	0.596723	0.541298	0.452862	retina	zebrafish_TNFa_72hr	mouse_NMDA_P60
0.440319	0.524839	0.509456	0.449398	retina	zebrafish_TNFa_72hr	mouse_NMDA_72hr
0.494584	0.72317	0.727115	0.546013	retina	zebrafish_TNFa_72hr	mouse_NMDA_48hr
0.46686	0.549319	0.555626	0.540781	retina	zebrafish_TNFa_72hr	mouse_NMDA_36hr
0.448206	0.424496	0.381736	0.483897	retina	zebrafish_TNFa_72hr	mouse_NMDA_24hr
0.474419	0.390263	0.375858	0.522843	retina	zebrafish_TNFa_72hr	mouse_NMDA_12hr
0.511242	0.582913	0.543373	0.479901	retina	zebrafish_TNFa_72hr	mouse_NMDA_6hr
0.571259	0.603353	0.572561	0.463474	retina	zebrafish_TNFa_72hr	mouse_NMDA_3hr
0.343375	0.287234	0.183561	0.302974	retina	zebrafish_TNFa_72hr	Macosko
0.45235	0.451099	0.417213	0.399581	retina	zebrafish_TNFa_36hr	mouse_LD_P60
0.508682	0.559733	0.542262	0.442706	retina	zebrafish_TNFa_36hr	mouse_LD_24hr
0.359155	0.291272	0.26652	0.43767	retina	zebrafish_TNFa_36hr	mouse_LD_10hr
0.458737	0.530438	0.508403	0.436868	retina	zebrafish_TNFa_36hr	mouse_LD_4hr
0.48085	0.484955	0.481508	0.418585	retina	zebrafish_TNFa_36hr	mouse_LD_0hr
0.419702	0.49447	0.466251	0.445831	retina	zebrafish_TNFa_36hr	mouse_NMDA_P60
0.422011	0.435912	0.457738	0.47696	retina	zebrafish_TNFa_36hr	mouse_NMDA_72hr
0.411454	0.430558	0.470804	0.534219	retina	zebrafish_TNFa_36hr	mouse_NMDA_48hr
0.288928	0.181287	0.226955	0.509726	retina	zebrafish_TNFa_36hr	mouse_NMDA_36hr
0.466737	0.355536	0.330711	0.541466	retina	zebrafish_TNFa_36hr	mouse_NMDA_24hr
0.46281	0.318407	0.293964	0.587135	retina	zebrafish_TNFa_36hr	mouse_NMDA_12hr
0.447227	0.424344	0.400355	0.474258	retina	zebrafish_TNFa_36hr	mouse_NMDA_6hr
0.442467	0.410561	0.408492	0.419503	retina	zebrafish_TNFa_36hr	mouse_NMDA_3hr
0.320431	0.235797	0.172358	0.315511	retina	zebrafish_TNFa_36hr	Macosko
0.471211	0.70626	0.625197	0.385702	retina	zebrafish_TNFa_20hr	mouse_LD_P60
0.445253	0.620367	0.608495	0.47054	retina	zebrafish_TNFa_20hr	mouse_LD_24hr
0.368331	0.604586	0.557369	0.399175	retina	zebrafish_TNFa_20hr	mouse_LD_10hr
0.374832	0.512595	0.493536	0.457024	retina	zebrafish_TNFa_20hr	mouse_LD_4hr
0.421171	0.693148	0.675305	0.418423	retina	zebrafish_TNFa_20hr	mouse_LD_0hr
0.424409	0.700942	0.633183	0.461202	retina	zebrafish_TNFa_20hr	mouse_NMDA_P60
0.333604	0.563972	0.506754	0.462922	retina	zebrafish_TNFa_20hr	mouse_NMDA_72hr
0.357295	0.531687	0.501638	0.55781	retina	zebrafish_TNFa_20hr	mouse_NMDA_48hr
0.326889	0.411128	0.359186	0.498777	retina	zebrafish_TNFa_20hr	mouse_NMDA_36hr
0.354059	0.534441	0.484502	0.455507	retina	zebrafish_TNFa_20hr	mouse_NMDA_24hr
0.321395	0.306065	0.293964	0.513225	retina	zebrafish_TNFa_20hr	mouse_NMDA_12hr
0.355873	0.57175	0.492422	0.481346	retina	zebrafish_TNFa_20hr	mouse_NMDA_6hr
0.39631	0.564815	0.527278	0.458951	retina	zebrafish_TNFa_20hr	mouse_NMDA_3hr
0.476856	0.32092	0.261806	0.383231	retina	zebrafish_TNFa_20hr	Macosko
0.478523	0.517009	0.458574	0.390602	retina	zebrafish_TNFa_10hr	mouse_LD_P60
0.516919	0.602386	0.587679	0.443749	retina	zebrafish_TNFa_10hr	mouse_LD_24hr
0.352119	0.32378	0.303877	0.39373	retina	zebrafish_TNFa_10hr	mouse_LD_10hr
0.384072	0.36928	0.364253	0.453289	retina	zebrafish_TNFa_10hr	mouse_LD_4hr
0.524238	0.773138	0.746991	0.4526	retina	zebrafish_TNFa_10hr	mouse_LD_0hr
0.439749	0.664399	0.596458	0.444739	retina	zebrafish_TNFa_10hr	mouse_NMDA_P60
0.3675	0.548864	0.487457	0.432836	retina	zebrafish_TNFa_10hr	mouse_NMDA_72hr
0.356615	0.346773	0.341492	0.537359	retina	zebrafish_TNFa_10hr	mouse_NMDA_48hr
0.302608	0.233679	0.221869	0.499194	retina	zebrafish_TNFa_10hr	mouse_NMDA_36hr
0.404836	0.380784	0.353124	0.4725	retina	zebrafish_TNFa_10hr	mouse_NMDA_24hr
0.325406	0.18242	0.155266	0.560714	retina	zebrafish_TNFa_10hr	mouse_NMDA_12hr
0.372629	0.379509	0.338762	0.482219	retina	zebrafish_TNFa_10hr	mouse_NMDA_6hr
0.406423	0.444507	0.420989	0.438305	retina	zebrafish_TNFa_10hr	mouse_NMDA_3hr
0.373552	0.300752	0.222326	0.348244	retina	zebrafish_TNFa_10hr	Macosko
0.491868	0.612116	0.618183	0.376302	retina	zebrafish_NMDA_Adult	mouse_LD_P60
0.459908	0.585361	0.621741	0.420098	retina	zebrafish_NMDA_Adult	mouse_LD_24hr
0.388594	0.372137	0.426621	0.37876	retina	zebrafish_NMDA_Adult	mouse_LD_10hr
0.369093	0.421323	0.462831	0.414663	retina	zebrafish_NMDA_Adult	mouse_LD_4hr
0.547934	0.684657	0.695774	0.406848	retina	zebrafish_NMDA_Adult	mouse_LD_0hr
0.463858	0.676133	0.682973	0.435658	retina	zebrafish_NMDA_Adult	mouse_NMDA_P60
0.290973	0.452056	0.507526	0.503445	retina	zebrafish_NMDA_Adult	mouse_NMDA_72hr
0.328342	0.390581	0.43361	0.551447	retina	zebrafish_NMDA_Adult	mouse_NMDA_48hr
0.356756	0.194698	0.281627	0.57866	retina	zebrafish_NMDA_Adult	mouse_NMDA_36hr
0.445803	0.514104	0.549833	0.49523	retina	zebrafish_NMDA_Adult	mouse_NMDA_24hr
0.37541	0.383668	0.452544	0.545349	retina	zebrafish_NMDA_Adult	mouse_NMDA_12hr
0.414128	0.525051	0.581425	0.501467	retina	zebrafish_NMDA_Adult	mouse_NMDA_6hr
0.535598	0.609929	0.644719	0.473893	retina	zebrafish_NMDA_Adult	mouse_NMDA_3hr
0.479987	0.76292	0.788319	0.425887	retina	zebrafish_NMDA_Adult	Macosko
0.558424	0.693118	0.65915	0.399297	retina	zebrafish_NMDA_36hr	mouse_LD_P60
0.577612	0.651745	0.656224	0.454269	retina	zebrafish_NMDA_36hr	mouse_LD_24hr
0.532331	0.626378	0.643227	0.442472	retina	zebrafish_NMDA_36hr	mouse_LD_10hr
0.464709	0.560355	0.549774	0.453303	retina	zebrafish_NMDA_36hr	mouse_LD_4hr
0.562368	0.71591	0.723184	0.457279	retina	zebrafish_NMDA_36hr	mouse_LD_0hr
0.506672	0.750753	0.730295	0.47401	retina	zebrafish_NMDA_36hr	mouse_NMDA_P60
0.532001	0.68954	0.730606	0.532937	retina	zebrafish_NMDA_36hr	mouse_NMDA_72hr
0.559484	0.680631	0.702833	0.577469	retina	zebrafish_NMDA_36hr	mouse_NMDA_48hr
0.495805	0.568291	0.626192	0.571584	retina	zebrafish_NMDA_36hr	mouse_NMDA_36hr
0.496414	0.602099	0.602766	0.516373	retina	zebrafish_NMDA_36hr	mouse_NMDA_24hr
0.499498	0.655599	0.653018	0.571408	retina	zebrafish_NMDA_36hr	mouse_NMDA_12hr
0.55541	0.80869	0.797646	0.537961	retina	zebrafish_NMDA_36hr	mouse_NMDA_6hr
0.56895	0.639356	0.632626	0.465052	retina	zebrafish_NMDA_36hr	mouse_NMDA_3hr
0.334854	0.254987	0.180191	0.358241	retina	zebrafish_NMDA_36hr	Macosko
0.599924	0.754067	0.748951	0.438657	retina	zebrafish_NMDA_20hr	mouse_LD_P60
0.638017	0.634095	0.662742	0.478608	retina	zebrafish_NMDA_20hr	mouse_LD_24hr
0.567842	0.641627	0.664888	0.467184	retina	zebrafish_NMDA_20hr	mouse_LD_10hr
0.527816	0.645952	0.659017	0.494785	retina	zebrafish_NMDA_20hr	mouse_LD_4hr
0.515171	0.625972	0.626812	0.421333	retina	zebrafish_NMDA_20hr	mouse_LD_0hr
0.577424	0.810135	0.813906	0.538548	retina	zebrafish_NMDA_20hr	mouse_NMDA_P60
0.528107	0.799615	0.817059	0.551112	retina	zebrafish_NMDA_20hr	mouse_NMDA_72hr
0.598977	0.761022	0.794373	0.593778	retina	zebrafish_NMDA_20hr	mouse_NMDA_48hr
0.533899	0.721877	0.760966	0.603383	retina	zebrafish_NMDA_20hr	mouse_NMDA_36hr
0.604968	0.83067	0.837864	0.556404	retina	zebrafish_NMDA_20hr	mouse_NMDA_24hr
0.556402	0.822805	0.836686	0.600209	retina	zebrafish_NMDA_20hr	mouse_NMDA_12hr
0.622358	0.783069	0.788455	0.540223	retina	zebrafish_NMDA_20hr	mouse_NMDA_6hr
0.635419	0.756467	0.770626	0.519342	retina	zebrafish_NMDA_20hr	mouse_NMDA_3hr
0.460098	0.85664	0.83869	0.441229	retina	zebrafish_NMDA_20hr	Macosko
0.445593	0.591963	0.591767	0.408618	retina	zebrafish_NMDA_10hr	mouse_LD_P60
0.490452	0.587947	0.622792	0.453528	retina	zebrafish_NMDA_10hr	mouse_LD_24hr
0.433241	0.553152	0.580129	0.42723	retina	zebrafish_NMDA_10hr	mouse_LD_10hr
0.404467	0.511109	0.484486	0.432366	retina	zebrafish_NMDA_10hr	mouse_LD_4hr
0.464735	0.716398	0.728543	0.445639	retina	zebrafish_NMDA_10hr	mouse_LD_0hr
0.464269	0.645106	0.661054	0.486988	retina	zebrafish_NMDA_10hr	mouse_NMDA_P60
0.400964	0.589992	0.608259	0.519712	retina	zebrafish_NMDA_10hr	mouse_NMDA_72hr
0.435589	0.443915	0.48333	0.531058	retina	zebrafish_NMDA_10hr	mouse_NMDA_48hr
0.389837	0.355827	0.425302	0.555648	retina	zebrafish_NMDA_10hr	mouse_NMDA_36hr
0.524585	0.719078	0.740582	0.52105	retina	zebrafish_NMDA_10hr	mouse_NMDA_24hr
0.397151	0.68309	0.68568	0.552234	retina	zebrafish_NMDA_10hr	mouse_NMDA_12hr
0.548348	0.804989	0.816833	0.570511	retina	zebrafish_NMDA_10hr	mouse_NMDA_6hr
0.451976	0.520578	0.521231	0.479329	retina	zebrafish_NMDA_10hr	mouse_NMDA_3hr
0.343498	0.748021	0.760177	0.42239	retina	zebrafish_NMDA_10hr	Macosko
0.422038	0.588778	0.614381	0.420048	retina	zebrafish_NMDA_4hr	mouse_LD_P60
0.442271	0.491765	0.534062	0.398489	retina	zebrafish_NMDA_4hr	mouse_LD_24hr
0.426775	0.394546	0.452833	0.392293	retina	zebrafish_NMDA_4hr	mouse_LD_10hr
0.39133	0.364603	0.360375	0.38984	retina	zebrafish_NMDA_4hr	mouse_LD_4hr
0.437866	0.479537	0.464289	0.370729	retina	zebrafish_NMDA_4hr	mouse_LD_0hr
0.416405	0.559396	0.581071	0.505865	retina	zebrafish_NMDA_4hr	mouse_NMDA_P60
0.435525	0.560535	0.598997	0.541476	retina	zebrafish_NMDA_4hr	mouse_NMDA_72hr
0.34691	0.376189	0.422047	0.555247	retina	zebrafish_NMDA_4hr	mouse_NMDA_48hr
0.415592	0.274575	0.356008	0.579122	retina	zebrafish_NMDA_4hr	mouse_NMDA_36hr
0.417482	0.423656	0.486648	0.483974	retina	zebrafish_NMDA_4hr	mouse_NMDA_24hr
0.368731	0.371487	0.455385	0.52565	retina	zebrafish_NMDA_4hr	mouse_NMDA_12hr
0.415606	0.489327	0.536117	0.475561	retina	zebrafish_NMDA_4hr	mouse_NMDA_6hr
0.464666	0.518991	0.548643	0.446995	retina	zebrafish_NMDA_4hr	mouse_NMDA_3hr
0.323408	0.821572	0.781646	0.375732	retina	zebrafish_NMDA_4hr	Macosko
0.552188	0.683775	0.658954	0.409009	retina	zebrafish_LD_Adult	mouse_LD_P60
0.528908	0.542442	0.554458	0.379378	retina	zebrafish_LD_Adult	mouse_LD_24hr
0.462789	0.462241	0.495841	0.348328	retina	zebrafish_LD_Adult	mouse_LD_10hr
0.454912	0.517814	0.546542	0.380811	retina	zebrafish_LD_Adult	mouse_LD_4hr
0.581279	0.671729	0.678556	0.417682	retina	zebrafish_LD_Adult	mouse_LD_0hr
0.51222	0.750779	0.737262	0.477084	retina	zebrafish_LD_Adult	mouse_NMDA_P60
0.481348	0.684096	0.688151	0.4785	retina	zebrafish_LD_Adult	mouse_NMDA_72hr
0.441844	0.614727	0.66429	0.552043	retina	zebrafish_LD_Adult	mouse_NMDA_48hr
0.47773	0.657852	0.684043	0.566552	retina	zebrafish_LD_Adult	mouse_NMDA_36hr
0.527764	0.733927	0.745827	0.509298	retina	zebrafish_LD_Adult	mouse_NMDA_24hr
0.478968	0.785329	0.79503	0.578928	retina	zebrafish_LD_Adult	mouse_NMDA_12hr
0.470159	0.649548	0.61722	0.430246	retina	zebrafish_LD_Adult	mouse_NMDA_6hr
0.571323	0.679297	0.692153	0.46385	retina	zebrafish_LD_Adult	mouse_NMDA_3hr
0.44918	0.380417	0.459025	0.354789	retina	zebrafish_LD_Adult	Macosko
0.5432	0.650409	0.54431	0.406875	retina	zebrafish_LD_36hr	mouse_LD_P60
0.519291	0.591032	0.514718	0.425137	retina	zebrafish_LD_36hr	mouse_LD_24hr
0.47925	0.481581	0.407314	0.407751	retina	zebrafish_LD_36hr	mouse_LD_10hr
0.413027	0.573518	0.48384	0.441967	retina	zebrafish_LD_36hr	mouse_LD_4hr
0.458888	0.558698	0.441711	0.371284	retina	zebrafish_LD_36hr	mouse_LD_0hr
0.536724	0.686396	0.58949	0.480989	retina	zebrafish_LD_36hr	mouse_NMDA_P60
0.46281	0.628883	0.538016	0.443469	retina	zebrafish_LD_36hr	mouse_NMDA_72hr
0.488212	0.705779	0.62382	0.52587	retina	zebrafish_LD_36hr	mouse_NMDA_48hr
0.404012	0.642251	0.579148	0.528581	retina	zebrafish_LD_36hr	mouse_NMDA_36hr
0.463914	0.657297	0.561993	0.466282	retina	zebrafish_LD_36hr	mouse_NMDA_24hr
0.529307	0.701371	0.64213	0.539084	retina	zebrafish_LD_36hr	mouse_NMDA_12hr
0.54845	0.659594	0.589165	0.514009	retina	zebrafish_LD_36hr	mouse_NMDA_6hr
0.536254	0.588376	0.502956	0.454902	retina	zebrafish_LD_36hr	mouse_NMDA_3hr
0.229684	0.154544	0.115939	0.287865	retina	zebrafish_LD_36hr	Macosko
0.449292	0.643025	0.525039	0.392025	retina	zebrafish_LD_20hr	mouse_LD_P60
0.411258	0.595507	0.501682	0.415839	retina	zebrafish_LD_20hr	mouse_LD_24hr
0.440872	0.499262	0.416732	0.438358	retina	zebrafish_LD_20hr	mouse_LD_10hr
0.423445	0.606647	0.504848	0.468341	retina	zebrafish_LD_20hr	mouse_LD_4hr
0.439973	0.581521	0.462005	0.38548	retina	zebrafish_LD_20hr	mouse_LD_0hr
0.404026	0.669874	0.556104	0.413472	retina	zebrafish_LD_20hr	mouse_NMDA_P60
0.387116	0.601698	0.512929	0.453231	retina	zebrafish_LD_20hr	mouse_NMDA_72hr
0.41937	0.669706	0.594334	0.546791	retina	zebrafish_LD_20hr	mouse_NMDA_48hr
0.37274	0.552239	0.525747	0.568867	retina	zebrafish_LD_20hr	mouse_NMDA_36hr
0.522196	0.630378	0.547449	0.506311	retina	zebrafish_LD_20hr	mouse_NMDA_24hr
0.490929	0.652671	0.60497	0.534363	retina	zebrafish_LD_20hr	mouse_NMDA_12hr
0.415481	0.621675	0.538536	0.467628	retina	zebrafish_LD_20hr	mouse_NMDA_6hr
0.481069	0.573952	0.477829	0.420166	retina	zebrafish_LD_20hr	mouse_NMDA_3hr
0.550898	0.811712	0.797782	0.407053	retina	zebrafish_LD_20hr	Macosko
0.434775	0.637876	0.567908	0.389439	retina	zebrafish_LD_10hr	mouse_LD_P60
0.423486	0.595531	0.515559	0.415714	retina	zebrafish_LD_10hr	mouse_LD_24hr
0.400353	0.503271	0.410768	0.391251	retina	zebrafish_LD_10hr	mouse_LD_10hr
0.390636	0.594082	0.506141	0.432044	retina	zebrafish_LD_10hr	mouse_LD_4hr
0.41828	0.57321	0.460599	0.371114	retina	zebrafish_LD_10hr	mouse_LD_0hr
0.375178	0.627808	0.603861	0.448552	retina	zebrafish_LD_10hr	mouse_NMDA_P60
0.39249	0.49179	0.465071	0.463075	retina	zebrafish_LD_10hr	mouse_NMDA_72hr
0.410117	0.592839	0.572365	0.562772	retina	zebrafish_LD_10hr	mouse_NMDA_48hr
0.326064	0.603185	0.575334	0.594931	retina	zebrafish_LD_10hr	mouse_NMDA_36hr
0.440049	0.565357	0.536719	0.520964	retina	zebrafish_LD_10hr	mouse_NMDA_24hr
0.459248	0.624141	0.609231	0.573969	retina	zebrafish_LD_10hr	mouse_NMDA_12hr
0.35538	0.609287	0.532248	0.432224	retina	zebrafish_LD_10hr	mouse_NMDA_6hr
0.405963	0.577922	0.501478	0.412921	retina	zebrafish_LD_10hr	mouse_NMDA_3hr
0.45893	0.851703	0.793898	0.413735	retina	zebrafish_LD_10hr	Macosko
0.379709	0.580507	0.471093	0.293476	retina	zebrafish_LD_4hr	mouse_LD_P60
0.417564	0.428629	0.368587	0.336789	retina	zebrafish_LD_4hr	mouse_LD_24hr
0.448105	0.512043	0.518286	0.352399	retina	zebrafish_LD_4hr	mouse_LD_10hr
0.369059	0.459044	0.399806	0.359649	retina	zebrafish_LD_4hr	mouse_LD_4hr
0.432316	0.516184	0.451111	0.360075	retina	zebrafish_LD_4hr	mouse_LD_0hr
0.325026	0.558482	0.449702	0.322755	retina	zebrafish_LD_4hr	mouse_NMDA_P60
0.36605	0.464486	0.384408	0.37004	retina	zebrafish_LD_4hr	mouse_NMDA_72hr
0.313533	0.369123	0.314126	0.438018	retina	zebrafish_LD_4hr	mouse_NMDA_48hr
0.367168	0.452837	0.439924	0.444143	retina	zebrafish_LD_4hr	mouse_NMDA_36hr
0.434045	0.579231	0.564616	0.408009	retina	zebrafish_LD_4hr	mouse_NMDA_24hr
0.442343	0.610289	0.589586	0.567239	retina	zebrafish_LD_4hr	mouse_NMDA_12hr
0.503963	0.579405	0.602386	0.471358	retina	zebrafish_LD_4hr	mouse_NMDA_6hr
0.404164	0.457316	0.423676	0.363876	retina	zebrafish_LD_4hr	mouse_NMDA_3hr
0.438623	0.82506	0.785864	0.39536	retina	zebrafish_LD_4hr	Macosko
0.198773	0.371815	0.343657	0.346243	retina	zebrafish_TNFa_Adult	chick_P10
0.35518	0.725165	0.710905	0.472572	retina	zebrafish_TNFa_72hr	chick_P10
0.329381	0.697448	0.699761	0.427878	retina	zebrafish_TNFa_36hr	chick_P10
0.262174	0.435918	0.428396	0.474934	retina	zebrafish_TNFa_20hr	chick_P10
0.231815	0.342529	0.412114	0.421172	retina	zebrafish_TNFa_10hr	chick_P10
0.269142	0.63731	0.636515	0.369049	retina	zebrafish_NMDA_Adult	chick_P10
0.384267	0.657824	0.695564	0.468394	retina	zebrafish_NMDA_36hr	chick_P10
0.309792	0.558546	0.616615	0.461901	retina	zebrafish_NMDA_20hr	chick_P10
0.247126	0.317132	0.325566	0.434847	retina	zebrafish_NMDA_10hr	chick_P10
0.199038	0.286465	0.309429	0.434781	retina	zebrafish_NMDA_4hr	chick_P10
0.256187	0.6124	0.622187	0.444412	retina	zebrafish_LD_Adult	chick_P10
0.287536	0.518647	0.509661	0.409822	retina	zebrafish_LD_36hr	chick_P10
0.25814	0.605358	0.585426	0.419564	retina	zebrafish_LD_20hr	chick_P10
0.277016	0.560947	0.558651	0.429392	retina	zebrafish_LD_10hr	chick_P10
0.213653	0.490479	0.490556	0.362789	retina	zebrafish_LD_4hr	chick_P10
0.63471	0.860875	0.854559	0.692765	pancreas	panc8	FACS
0.544542	0.703774	0.727996	0.598948	pancreas	panc8	Baron_mouse
0.658314	0.879345	0.879427	0.728015	pancreas	Baron_human	FACS
0.721539	0.918023	0.919406	0.697955	pancreas	Baron_human	Baron_mouse
0.354846	0.56531	0.585132	0.495668	pancreas	FACS	Baron_human
0.44237	0.642687	0.534135	0.555245	pancreas	Baron_mouse	Baron_human
0.200688	0.593208	0.183387	0.666627	kidney	Wang_Kidney	Quake_10x_Kidney
0.292432	0.463167	0.435792	0.512201	kidney	Wang_Kidney	Adam
0.129025	0.280813	0.366876	0.312011	kidney	Wang_Kidney	Park
0.155333	0.139957	0.256291	0.357234	kidney	Wang_Kidney	Karaiskos_mouse
0.22463	0.691172	0.235886	0.609723	kidney	Young	Quake_10x_Kidney
0.136729	0.369745	0.297268	0.438058	kidney	Young	Adam
0.155022	0.434259	0.480192	0.346951	kidney	Young	Park
0.203266	0.410619	0.539447	0.25461	kidney	Young	Karaiskos_mouse
0.25919	0.677598	0.24991	0.59545	kidney	Wu_human	Quake_10x_Kidney
0.186406	0.371489	0.279508	0.336266	kidney	Wu_human	Adam
0.144799	0.752768	0.627592	0.193862	kidney	Wu_human	Park
0.250146	0.239778	0.183727	0.197248	kidney	Wu_human	Karaiskos_mouse
0.225223	0.697429	0.158936	0.476628	kidney	Hochane	Quake_10x_Kidney
0.23761	0.387595	0.353005	0.520641	kidney	Hochane	Adam
0.080635	0.541324	0.514299	0.197658	kidney	Hochane	Park
0.557883	0.934651	0.949668	0.498311	kidney	Hochane	Karaiskos_mouse
0.0529406	0.113661	0.0784819	0.296834	kidney	Quake_10x_Kidney	Wang_Kidney
0.249358	0.464699	0.393492	0.523913	kidney	Quake_10x_Kidney	Young
0.199944	0.152965	0.246626	0.263357	kidney	Quake_10x_Kidney	Wu_human
0.120493	0.344505	0.0243051	0.23006	kidney	Quake_10x_Kidney	Hochane
0.251221	0.457119	0.352616	0.402437	kidney	Adam	Wang_Kidney
0.175116	0.387194	0.361478	0.607106	kidney	Adam	Young
0.330003	0.711954	0.699395	0.671206	kidney	Adam	Wu_human
0.311972	0.736142	0.637546	0.642703	kidney	Adam	Hochane
0.0363169	0.108328	0.0674282	0.28729	kidney	Park	Wang_Kidney
0.206811	0.358537	0.340545	0.379363	kidney	Park	Young
0.304529	0.630591	0.640065	0.610776	kidney	Park	Wu_human
0.0028029	0.0400688	0.0205395	0.163175	kidney	Park	Hochane
0.191649	0.263367	0.228814	0.395527	kidney	Karaiskos_mouse	Wang_Kidney
0.149026	0.296177	0.186104	0.439743	kidney	Karaiskos_mouse	Young
0.204529	0.256129	0.200093	0.310657	kidney	Karaiskos_mouse	Wu_human
0.19963	0.262153	0.187183	0.261016	kidney	Karaiskos_mouse	Hochane

## Sheet: SciBet
Supplemental Table 1c. Annotation metrics and CAMUS scores for SciBet on cross-species data pairs.
Scibet_f1_macro	Scibet_f1_weight	Scibet_ACC	CAMUS_score	tissue	reference	query
0.455368	0.979662	0.979605	0.482986	brain	Lake_2018	Tasic18
0.523442	0.875006	0.878859	0.768189	brain	Lake_2018	Quake_Smart-seq2_Brain_Non-Myeloid
0.326802	0.768757	0.74767	0.504117	brain	Lake_2018	Campbell
0.45068	0.850125	0.841012	0.735162	brain	Lake_2018	Chen
0.516663	0.874355	0.856222	0.654208	brain	Lake_2018	Tosches_lizard
0.526973	0.908346	0.903611	0.651652	brain	Lake_2018	Tosches_turtle
0.332758	0.789626	0.729888	0.449347	brain	Tasic18	Lake_2018
0.440206	0.618941	0.573748	0.347395	brain	Quake_Smart-seq2_Brain_Non-Myeloid	Lake_2018
0.2821	0.58188	0.559126	0.339593	brain	Campbell	Lake_2018
0.371837	0.677045	0.640795	0.376852	brain	Chen	Lake_2018
0.31766	0.779972	0.730834	0.638461	brain	Tasic18	Tosches_lizard
0.443877	0.805938	0.769286	0.567755	brain	Quake_Smart-seq2_Brain_Non-Myeloid	Tosches_lizard
0.305642	0.772791	0.772391	0.663814	brain	Campbell	Tosches_lizard
0.410041	0.814813	0.810127	0.650013	brain	Chen	Tosches_lizard
0.24841	0.828877	0.804758	0.686139	brain	Tasic18	Tosches_turtle
0.502682	0.897716	0.87141	0.629969	brain	Quake_Smart-seq2_Brain_Non-Myeloid	Tosches_turtle
0.3534	0.818271	0.832726	0.663449	brain	Campbell	Tosches_turtle
0.412665	0.923082	0.911595	0.677194	brain	Chen	Tosches_turtle
0.434692	0.726534	0.697214	0.41018	brain	Tosches_lizard	Lake_2018
0.375489	0.979774	0.97861	0.481145	brain	Tosches_lizard	Tasic18
0.468911	0.865675	0.857395	0.749571	brain	Tosches_lizard	Quake_Smart-seq2_Brain_Non-Myeloid
0.346632	0.758924	0.741121	0.508915	brain	Tosches_lizard	Campbell
0.461682	0.875358	0.860038	0.766487	brain	Tosches_lizard	Chen
0.803453	0.96962	0.96737	0.722497	brain	Tosches_lizard	Tosches_turtle
0.392401	0.633879	0.631188	0.382818	brain	Tosches_turtle	Lake_2018
0.333949	0.971341	0.971284	0.478451	brain	Tosches_turtle	Tasic18
0.503053	0.70777	0.71332	0.741291	brain	Tosches_turtle	Quake_Smart-seq2_Brain_Non-Myeloid
0.320341	0.798091	0.77176	0.525903	brain	Tosches_turtle	Campbell
0.399132	0.798844	0.782943	0.752691	brain	Tosches_turtle	Chen
0.767445	0.902331	0.910437	0.74572	brain	Tosches_turtle	Tosches_lizard
0.408241	0.716664	0.693536	0.523981	testis	testis_human	testis_mouse
0.859549	0.918861	0.919208	0.659944	testis	testis_human	testis_monkey
0.374655	0.641994	0.631206	0.603897	testis	testis_mouse	testis_human
0.391553	0.823529	0.822935	0.620788	testis	testis_mouse	testis_monkey
0.785796	0.776226	0.775529	0.706704	testis	testis_monkey	testis_human
0.406933	0.682151	0.651844	0.529328	testis	testis_monkey	testis_mouse
0.399331	0.765027	0.755047	0.466268	retina	Menon_microfluidics	mouse_LD_P60
0.462488	0.72131	0.743061	0.508341	retina	Menon_microfluidics	mouse_LD_24hr
0.398879	0.715698	0.746978	0.49995	retina	Menon_microfluidics	mouse_LD_10hr
0.406988	0.659953	0.693924	0.465449	retina	Menon_microfluidics	mouse_LD_4hr
0.480344	0.79501	0.80427	0.502521	retina	Menon_microfluidics	mouse_LD_0hr
0.421965	0.792948	0.779649	0.513332	retina	Menon_microfluidics	mouse_NMDA_P60
0.490986	0.895139	0.904284	0.626505	retina	Menon_microfluidics	mouse_NMDA_72hr
0.479686	0.909722	0.911736	0.647888	retina	Menon_microfluidics	mouse_NMDA_48hr
0.498811	0.854567	0.866497	0.624311	retina	Menon_microfluidics	mouse_NMDA_36hr
0.448021	0.825916	0.84144	0.558573	retina	Menon_microfluidics	mouse_NMDA_24hr
0.36482	0.764432	0.791243	0.523328	retina	Menon_microfluidics	mouse_NMDA_12hr
0.354899	0.73959	0.748468	0.490386	retina	Menon_microfluidics	mouse_NMDA_6hr
0.409814	0.667403	0.688928	0.448158	retina	Menon_microfluidics	mouse_NMDA_3hr
0.346839	0.595543	0.62009	0.338741	retina	Menon_microfluidics	Macosko
0.466773	0.766259	0.770451	0.476295	retina	Menon_seqwell	mouse_LD_P60
0.603597	0.791078	0.811817	0.546637	retina	Menon_seqwell	mouse_LD_24hr
0.556915	0.833164	0.838016	0.53644	retina	Menon_seqwell	mouse_LD_10hr
0.531685	0.735242	0.763736	0.510038	retina	Menon_seqwell	mouse_LD_4hr
0.553584	0.804798	0.821137	0.528589	retina	Menon_seqwell	mouse_LD_0hr
0.518776	0.811251	0.815648	0.557059	retina	Menon_seqwell	mouse_NMDA_P60
0.606965	0.919248	0.922424	0.640017	retina	Menon_seqwell	mouse_NMDA_72hr
0.619904	0.936466	0.936597	0.679672	retina	Menon_seqwell	mouse_NMDA_48hr
0.637675	0.952573	0.949777	0.705905	retina	Menon_seqwell	mouse_NMDA_36hr
0.631779	0.913782	0.918216	0.63602	retina	Menon_seqwell	mouse_NMDA_24hr
0.529024	0.861691	0.877633	0.614514	retina	Menon_seqwell	mouse_NMDA_12hr
0.517078	0.828125	0.836988	0.562631	retina	Menon_seqwell	mouse_NMDA_6hr
0.501925	0.724424	0.748186	0.500258	retina	Menon_seqwell	mouse_NMDA_3hr
0.459464	0.644427	0.676375	0.394724	retina	Menon_seqwell	Macosko
0.364629	0.649749	0.700051	0.498085	retina	Menon_microfluidics	chick_P10
0.391263	0.669424	0.695926	0.525175	retina	Menon_seqwell	chick_P10
0.270319	0.433795	0.426892	0.292366	retina	Menon_microfluidics	zebrafish_TNFa_Adult
0.252899	0.465605	0.448367	0.322244	retina	Menon_microfluidics	zebrafish_TNFa_72hr
0.26885	0.447216	0.4342	0.299648	retina	Menon_microfluidics	zebrafish_TNFa_36hr
0.288261	0.440507	0.437082	0.356702	retina	Menon_microfluidics	zebrafish_TNFa_20hr
0.264799	0.375284	0.382741	0.370979	retina	Menon_microfluidics	zebrafish_TNFa_10hr
0.272488	0.429546	0.418527	0.29511	retina	Menon_microfluidics	zebrafish_NMDA_Adult
0.264493	0.418499	0.424888	0.374989	retina	Menon_microfluidics	zebrafish_NMDA_36hr
0.262969	0.400526	0.425158	0.349357	retina	Menon_microfluidics	zebrafish_NMDA_20hr
0.234695	0.322675	0.304845	0.281651	retina	Menon_microfluidics	zebrafish_NMDA_10hr
0.239133	0.309853	0.302559	0.310721	retina	Menon_microfluidics	zebrafish_NMDA_4hr
0.276781	0.428412	0.411907	0.301907	retina	Menon_microfluidics	zebrafish_LD_Adult
0.201992	0.33984	0.371993	0.235402	retina	Menon_microfluidics	zebrafish_LD_36hr
0.211204	0.337028	0.330778	0.238002	retina	Menon_microfluidics	zebrafish_LD_20hr
0.195938	0.284377	0.275163	0.264577	retina	Menon_microfluidics	zebrafish_LD_10hr
0.225019	0.266775	0.286906	0.276428	retina	Menon_microfluidics	zebrafish_LD_4hr
0.315632	0.50057	0.478214	0.317651	retina	Menon_seqwell	zebrafish_TNFa_Adult
0.290351	0.501497	0.465389	0.353195	retina	Menon_seqwell	zebrafish_TNFa_72hr
0.277603	0.484804	0.435795	0.314287	retina	Menon_seqwell	zebrafish_TNFa_36hr
0.362646	0.569494	0.552694	0.400568	retina	Menon_seqwell	zebrafish_TNFa_20hr
0.349422	0.524996	0.511311	0.421916	retina	Menon_seqwell	zebrafish_TNFa_10hr
0.345417	0.531011	0.50562	0.331046	retina	Menon_seqwell	zebrafish_NMDA_Adult
0.299304	0.501851	0.4529	0.380701	retina	Menon_seqwell	zebrafish_NMDA_36hr
0.341413	0.497079	0.48338	0.38404	retina	Menon_seqwell	zebrafish_NMDA_20hr
0.29324	0.446143	0.395388	0.310797	retina	Menon_seqwell	zebrafish_NMDA_10hr
0.321663	0.467252	0.436984	0.345044	retina	Menon_seqwell	zebrafish_NMDA_4hr
0.334958	0.494616	0.4738	0.328236	retina	Menon_seqwell	zebrafish_LD_Adult
0.24773	0.396003	0.411863	0.25693	retina	Menon_seqwell	zebrafish_LD_36hr
0.25762	0.410276	0.383992	0.230047	retina	Menon_seqwell	zebrafish_LD_20hr
0.260624	0.368817	0.362801	0.293403	retina	Menon_seqwell	zebrafish_LD_10hr
0.286448	0.404118	0.403165	0.298844	retina	Menon_seqwell	zebrafish_LD_4hr
0.387875	0.606341	0.629834	0.386819	retina	mouse_LD_P60	Menon_microfluidics
0.579351	0.77849	0.808805	0.587725	retina	mouse_LD_P60	Menon_seqwell
0.492713	0.663178	0.702852	0.427269	retina	mouse_LD_24hr	Menon_microfluidics
0.631614	0.802966	0.836823	0.621292	retina	mouse_LD_24hr	Menon_seqwell
0.472071	0.739209	0.759743	0.452988	retina	mouse_LD_10hr	Menon_microfluidics
0.594947	0.838673	0.866379	0.644022	retina	mouse_LD_10hr	Menon_seqwell
0.348477	0.534952	0.55826	0.341978	retina	mouse_LD_4hr	Menon_microfluidics
0.5772	0.818942	0.844212	0.619182	retina	mouse_LD_4hr	Menon_seqwell
0.37326	0.555957	0.582798	0.372925	retina	mouse_LD_0hr	Menon_microfluidics
0.598196	0.817265	0.847599	0.629487	retina	mouse_LD_0hr	Menon_seqwell
0.37638	0.5329	0.57135	0.386173	retina	mouse_NMDA_P60	Menon_microfluidics
0.575806	0.763878	0.806958	0.597514	retina	mouse_NMDA_P60	Menon_seqwell
0.491948	0.727182	0.763675	0.505262	retina	mouse_NMDA_72hr	Menon_microfluidics
0.612208	0.855316	0.873153	0.652426	retina	mouse_NMDA_72hr	Menon_seqwell
0.485886	0.644233	0.704196	0.480166	retina	mouse_NMDA_48hr	Menon_microfluidics
0.612875	0.884369	0.895936	0.673683	retina	mouse_NMDA_48hr	Menon_seqwell
0.356916	0.578391	0.619133	0.404945	retina	mouse_NMDA_36hr	Menon_microfluidics
0.430382	0.554666	0.608067	0.540726	retina	mouse_NMDA_36hr	Menon_seqwell
0.433333	0.587268	0.649893	0.439535	retina	mouse_NMDA_24hr	Menon_microfluidics
0.581768	0.736262	0.79064	0.621065	retina	mouse_NMDA_24hr	Menon_seqwell
0.388148	0.452925	0.535314	0.390469	retina	mouse_NMDA_12hr	Menon_microfluidics
0.573741	0.737654	0.790948	0.597229	retina	mouse_NMDA_12hr	Menon_seqwell
0.340763	0.389373	0.46374	0.357206	retina	mouse_NMDA_6hr	Menon_microfluidics
0.548474	0.623778	0.699815	0.571867	retina	mouse_NMDA_6hr	Menon_seqwell
0.379831	0.437702	0.498283	0.342061	retina	mouse_NMDA_3hr	Menon_microfluidics
0.556206	0.780997	0.814963	0.605137	retina	mouse_NMDA_3hr	Menon_seqwell
0.418225	0.649796	0.663183	0.404258	retina	Macosko	Menon_microfluidics
0.653135	0.890557	0.891626	0.652923	retina	Macosko	Menon_seqwell
0.266938	0.530636	0.596498	0.484274	retina	mouse_LD_P60	chick_P10
0.303206	0.490816	0.568637	0.4305	retina	mouse_LD_24hr	chick_P10
0.295185	0.5072	0.590491	0.471461	retina	mouse_LD_10hr	chick_P10
0.288624	0.547265	0.626167	0.447596	retina	mouse_LD_4hr	chick_P10
0.304281	0.645664	0.694696	0.486492	retina	mouse_LD_0hr	chick_P10
0.250848	0.361792	0.459512	0.443153	retina	mouse_NMDA_P60	chick_P10
0.310675	0.579117	0.6431	0.482988	retina	mouse_NMDA_72hr	chick_P10
0.29651	0.630396	0.680295	0.498303	retina	mouse_NMDA_48hr	chick_P10
0.274306	0.476232	0.559085	0.452037	retina	mouse_NMDA_36hr	chick_P10
0.286797	0.570963	0.634778	0.451412	retina	mouse_NMDA_24hr	chick_P10
0.265829	0.403681	0.499674	0.422017	retina	mouse_NMDA_12hr	chick_P10
0.248211	0.360594	0.452276	0.40533	retina	mouse_NMDA_6hr	chick_P10
0.292945	0.548358	0.616904	0.441723	retina	mouse_NMDA_3hr	chick_P10
0.346405	0.716535	0.73095	0.526889	retina	Macosko	chick_P10
0.372973	0.495494	0.479548	0.321654	retina	mouse_LD_P60	zebrafish_TNFa_Adult
0.345584	0.463661	0.472072	0.355555	retina	mouse_LD_P60	zebrafish_TNFa_72hr
0.35033	0.444325	0.453342	0.348279	retina	mouse_LD_P60	zebrafish_TNFa_36hr
0.389944	0.550999	0.536571	0.413298	retina	mouse_LD_P60	zebrafish_TNFa_20hr
0.396536	0.512949	0.511004	0.431173	retina	mouse_LD_P60	zebrafish_TNFa_10hr
0.392326	0.538414	0.520041	0.33666	retina	mouse_LD_P60	zebrafish_NMDA_Adult
0.367591	0.482858	0.496529	0.413439	retina	mouse_LD_P60	zebrafish_NMDA_36hr
0.385025	0.492114	0.513795	0.421547	retina	mouse_LD_P60	zebrafish_NMDA_20hr
0.32634	0.419032	0.407447	0.334067	retina	mouse_LD_P60	zebrafish_NMDA_10hr
0.362883	0.436977	0.405713	0.344608	retina	mouse_LD_P60	zebrafish_NMDA_4hr
0.416065	0.495761	0.500693	0.333379	retina	mouse_LD_P60	zebrafish_LD_Adult
0.291993	0.339044	0.38633	0.288832	retina	mouse_LD_P60	zebrafish_LD_36hr
0.303971	0.387135	0.392541	0.249443	retina	mouse_LD_P60	zebrafish_LD_20hr
0.333976	0.385053	0.39093	0.272583	retina	mouse_LD_P60	zebrafish_LD_10hr
0.329693	0.370384	0.378129	0.292777	retina	mouse_LD_P60	zebrafish_LD_4hr
0.373454	0.543537	0.514755	0.332854	retina	mouse_LD_24hr	zebrafish_TNFa_Adult
0.346243	0.504206	0.48178	0.345982	retina	mouse_LD_24hr	zebrafish_TNFa_72hr
0.360623	0.513407	0.50343	0.334629	retina	mouse_LD_24hr	zebrafish_TNFa_36hr
0.43976	0.606387	0.590838	0.417413	retina	mouse_LD_24hr	zebrafish_TNFa_20hr
0.416309	0.592387	0.578258	0.424972	retina	mouse_LD_24hr	zebrafish_TNFa_10hr
0.396547	0.573211	0.539697	0.348336	retina	mouse_LD_24hr	zebrafish_NMDA_Adult
0.436302	0.554314	0.557263	0.432966	retina	mouse_LD_24hr	zebrafish_NMDA_36hr
0.425543	0.562457	0.573756	0.433571	retina	mouse_LD_24hr	zebrafish_NMDA_20hr
0.363083	0.413384	0.409562	0.328609	retina	mouse_LD_24hr	zebrafish_NMDA_10hr
0.376789	0.450882	0.428726	0.322813	retina	mouse_LD_24hr	zebrafish_NMDA_4hr
0.399459	0.550452	0.518809	0.337386	retina	mouse_LD_24hr	zebrafish_LD_Adult
0.299335	0.390487	0.400079	0.258822	retina	mouse_LD_24hr	zebrafish_LD_36hr
0.315873	0.412128	0.403154	0.259827	retina	mouse_LD_24hr	zebrafish_LD_20hr
0.354265	0.3937	0.401454	0.284837	retina	mouse_LD_24hr	zebrafish_LD_10hr
0.34251	0.397936	0.39741	0.283134	retina	mouse_LD_24hr	zebrafish_LD_4hr
0.379767	0.508159	0.495612	0.319276	retina	mouse_LD_10hr	zebrafish_TNFa_Adult
0.344364	0.469851	0.488463	0.337971	retina	mouse_LD_10hr	zebrafish_TNFa_72hr
0.358252	0.39765	0.441059	0.334259	retina	mouse_LD_10hr	zebrafish_TNFa_36hr
0.406926	0.507643	0.526937	0.395687	retina	mouse_LD_10hr	zebrafish_TNFa_20hr
0.417279	0.61711	0.59392	0.43858	retina	mouse_LD_10hr	zebrafish_TNFa_10hr
0.396012	0.526217	0.512753	0.329659	retina	mouse_LD_10hr	zebrafish_NMDA_Adult
0.397348	0.535831	0.565692	0.443367	retina	mouse_LD_10hr	zebrafish_NMDA_36hr
0.401848	0.57024	0.591571	0.447482	retina	mouse_LD_10hr	zebrafish_NMDA_20hr
0.335465	0.455738	0.437064	0.337496	retina	mouse_LD_10hr	zebrafish_NMDA_10hr
0.369252	0.4793	0.453229	0.349384	retina	mouse_LD_10hr	zebrafish_NMDA_4hr
0.413251	0.514169	0.503772	0.331037	retina	mouse_LD_10hr	zebrafish_LD_Adult
0.315237	0.414258	0.468919	0.292844	retina	mouse_LD_10hr	zebrafish_LD_36hr
0.31726	0.425078	0.42615	0.265623	retina	mouse_LD_10hr	zebrafish_LD_20hr
0.37851	0.486424	0.484309	0.312955	retina	mouse_LD_10hr	zebrafish_LD_10hr
0.357824	0.363631	0.382734	0.296691	retina	mouse_LD_10hr	zebrafish_LD_4hr
0.360001	0.528659	0.504799	0.316181	retina	mouse_LD_4hr	zebrafish_TNFa_Adult
0.336498	0.458538	0.473206	0.341613	retina	mouse_LD_4hr	zebrafish_TNFa_72hr
0.336694	0.436161	0.46387	0.319729	retina	mouse_LD_4hr	zebrafish_TNFa_36hr
0.402757	0.554089	0.558789	0.40203	retina	mouse_LD_4hr	zebrafish_TNFa_20hr
0.397904	0.579583	0.566281	0.418481	retina	mouse_LD_4hr	zebrafish_TNFa_10hr
0.371127	0.554397	0.522197	0.323604	retina	mouse_LD_4hr	zebrafish_NMDA_Adult
0.380974	0.515589	0.54115	0.42539	retina	mouse_LD_4hr	zebrafish_NMDA_36hr
0.383724	0.552899	0.576363	0.426261	retina	mouse_LD_4hr	zebrafish_NMDA_20hr
0.334093	0.395844	0.402369	0.311266	retina	mouse_LD_4hr	zebrafish_NMDA_10hr
0.351032	0.412533	0.409639	0.312469	retina	mouse_LD_4hr	zebrafish_NMDA_4hr
0.393188	0.551389	0.519477	0.326917	retina	mouse_LD_4hr	zebrafish_LD_Adult
0.294001	0.441549	0.484631	0.281363	retina	mouse_LD_4hr	zebrafish_LD_36hr
0.268752	0.342538	0.3551	0.235013	retina	mouse_LD_4hr	zebrafish_LD_20hr
0.295164	0.335059	0.359357	0.254719	retina	mouse_LD_4hr	zebrafish_LD_10hr
0.318058	0.325763	0.351367	0.262623	retina	mouse_LD_4hr	zebrafish_LD_4hr
0.360668	0.448936	0.448499	0.300152	retina	mouse_LD_0hr	zebrafish_TNFa_Adult
0.323312	0.439516	0.445845	0.340644	retina	mouse_LD_0hr	zebrafish_TNFa_72hr
0.322071	0.423782	0.442176	0.319457	retina	mouse_LD_0hr	zebrafish_TNFa_36hr
0.405444	0.49808	0.51219	0.385154	retina	mouse_LD_0hr	zebrafish_TNFa_20hr
0.38873	0.537411	0.535162	0.399564	retina	mouse_LD_0hr	zebrafish_TNFa_10hr
0.371965	0.476567	0.473133	0.313623	retina	mouse_LD_0hr	zebrafish_NMDA_Adult
0.400027	0.521104	0.544869	0.423506	retina	mouse_LD_0hr	zebrafish_NMDA_36hr
0.375739	0.47456	0.507278	0.400349	retina	mouse_LD_0hr	zebrafish_NMDA_20hr
0.314114	0.387611	0.379099	0.293487	retina	mouse_LD_0hr	zebrafish_NMDA_10hr
0.34172	0.367748	0.356031	0.300003	retina	mouse_LD_0hr	zebrafish_NMDA_4hr
0.387292	0.430854	0.438183	0.306972	retina	mouse_LD_0hr	zebrafish_LD_Adult
0.292172	0.307951	0.360306	0.275423	retina	mouse_LD_0hr	zebrafish_LD_36hr
0.270958	0.328909	0.337264	0.23624	retina	mouse_LD_0hr	zebrafish_LD_20hr
0.314272	0.366639	0.371221	0.25846	retina	mouse_LD_0hr	zebrafish_LD_10hr
0.309508	0.329622	0.335827	0.268906	retina	mouse_LD_0hr	zebrafish_LD_4hr
0.379958	0.521988	0.508442	0.326173	retina	mouse_NMDA_P60	zebrafish_TNFa_Adult
0.327463	0.385861	0.42088	0.335407	retina	mouse_NMDA_P60	zebrafish_TNFa_72hr
0.347554	0.405393	0.438507	0.340758	retina	mouse_NMDA_P60	zebrafish_TNFa_36hr
0.388822	0.493341	0.503539	0.38915	retina	mouse_NMDA_P60	zebrafish_TNFa_20hr
0.374831	0.448235	0.470877	0.399674	retina	mouse_NMDA_P60	zebrafish_TNFa_10hr
0.394895	0.540056	0.527226	0.33361	retina	mouse_NMDA_P60	zebrafish_NMDA_Adult
0.377484	0.469205	0.498017	0.411009	retina	mouse_NMDA_P60	zebrafish_NMDA_36hr
0.38281	0.454865	0.497502	0.400975	retina	mouse_NMDA_P60	zebrafish_NMDA_20hr
0.315549	0.322941	0.336366	0.296069	retina	mouse_NMDA_P60	zebrafish_NMDA_10hr
0.327323	0.351619	0.341275	0.320499	retina	mouse_NMDA_P60	zebrafish_NMDA_4hr
0.423423	0.523041	0.526764	0.336528	retina	mouse_NMDA_P60	zebrafish_LD_Adult
0.277161	0.277135	0.336738	0.259957	retina	mouse_NMDA_P60	zebrafish_LD_36hr
0.290418	0.313334	0.337117	0.246463	retina	mouse_NMDA_P60	zebrafish_LD_20hr
0.307044	0.323586	0.33563	0.252533	retina	mouse_NMDA_P60	zebrafish_LD_10hr
0.303417	0.299739	0.319424	0.262546	retina	mouse_NMDA_P60	zebrafish_LD_4hr
0.340048	0.525746	0.496484	0.325098	retina	mouse_NMDA_72hr	zebrafish_TNFa_Adult
0.309791	0.433663	0.457824	0.336902	retina	mouse_NMDA_72hr	zebrafish_TNFa_72hr
0.319267	0.413684	0.45398	0.347774	retina	mouse_NMDA_72hr	zebrafish_TNFa_36hr
0.378939	0.548832	0.545419	0.394775	retina	mouse_NMDA_72hr	zebrafish_TNFa_20hr
0.351927	0.497448	0.513154	0.420581	retina	mouse_NMDA_72hr	zebrafish_TNFa_10hr
0.352871	0.551043	0.513729	0.33666	retina	mouse_NMDA_72hr	zebrafish_NMDA_Adult
0.356608	0.545374	0.556767	0.403436	retina	mouse_NMDA_72hr	zebrafish_NMDA_36hr
0.372591	0.518372	0.547252	0.414951	retina	mouse_NMDA_72hr	zebrafish_NMDA_20hr
0.315122	0.380389	0.38058	0.324309	retina	mouse_NMDA_72hr	zebrafish_NMDA_10hr
0.308534	0.434589	0.402193	0.322094	retina	mouse_NMDA_72hr	zebrafish_NMDA_4hr
0.357291	0.516917	0.484834	0.331588	retina	mouse_NMDA_72hr	zebrafish_LD_Adult
0.28402	0.370636	0.425808	0.285185	retina	mouse_NMDA_72hr	zebrafish_LD_36hr
0.270583	0.338602	0.356574	0.254969	retina	mouse_NMDA_72hr	zebrafish_LD_20hr
0.305278	0.373229	0.381554	0.273131	retina	mouse_NMDA_72hr	zebrafish_LD_10hr
0.329467	0.384361	0.398849	0.291822	retina	mouse_NMDA_72hr	zebrafish_LD_4hr
0.361818	0.548788	0.51106	0.335098	retina	mouse_NMDA_48hr	zebrafish_TNFa_Adult
0.328699	0.465699	0.475224	0.349997	retina	mouse_NMDA_48hr	zebrafish_TNFa_72hr
0.339926	0.444998	0.466422	0.348817	retina	mouse_NMDA_48hr	zebrafish_TNFa_36hr
0.412233	0.574166	0.567243	0.414896	retina	mouse_NMDA_48hr	zebrafish_TNFa_20hr
0.388935	0.560007	0.555021	0.430566	retina	mouse_NMDA_48hr	zebrafish_TNFa_10hr
0.379852	0.571471	0.531434	0.34442	retina	mouse_NMDA_48hr	zebrafish_NMDA_Adult
0.400104	0.538242	0.554784	0.435966	retina	mouse_NMDA_48hr	zebrafish_NMDA_36hr
0.391548	0.569735	0.590484	0.434538	retina	mouse_NMDA_48hr	zebrafish_NMDA_20hr
0.319963	0.406527	0.394965	0.331533	retina	mouse_NMDA_48hr	zebrafish_NMDA_10hr
0.339257	0.448462	0.418032	0.33352	retina	mouse_NMDA_48hr	zebrafish_NMDA_4hr
0.389133	0.54447	0.507827	0.335776	retina	mouse_NMDA_48hr	zebrafish_LD_Adult
0.326105	0.413211	0.463419	0.300632	retina	mouse_NMDA_48hr	zebrafish_LD_36hr
0.281406	0.35467	0.367188	0.260688	retina	mouse_NMDA_48hr	zebrafish_LD_20hr
0.317596	0.375935	0.392843	0.276245	retina	mouse_NMDA_48hr	zebrafish_LD_10hr
0.334391	0.357672	0.379281	0.289949	retina	mouse_NMDA_48hr	zebrafish_LD_4hr
0.267986	0.383887	0.381884	0.303638	retina	mouse_NMDA_36hr	zebrafish_TNFa_Adult
0.203836	0.356517	0.345984	0.300177	retina	mouse_NMDA_36hr	zebrafish_TNFa_72hr
0.221894	0.349799	0.353645	0.292219	retina	mouse_NMDA_36hr	zebrafish_TNFa_36hr
0.261213	0.407115	0.407983	0.345433	retina	mouse_NMDA_36hr	zebrafish_TNFa_20hr
0.267662	0.367903	0.377009	0.374913	retina	mouse_NMDA_36hr	zebrafish_TNFa_10hr
0.276422	0.435555	0.416679	0.317765	retina	mouse_NMDA_36hr	zebrafish_NMDA_Adult
0.242632	0.376687	0.396629	0.375215	retina	mouse_NMDA_36hr	zebrafish_NMDA_36hr
0.238093	0.358492	0.392787	0.37287	retina	mouse_NMDA_36hr	zebrafish_NMDA_20hr
0.2176	0.289223	0.278824	0.276563	retina	mouse_NMDA_36hr	zebrafish_NMDA_10hr
0.260324	0.316566	0.304589	0.314742	retina	mouse_NMDA_36hr	zebrafish_NMDA_4hr
0.288565	0.379179	0.37203	0.313613	retina	mouse_NMDA_36hr	zebrafish_LD_Adult
0.223052	0.324311	0.341746	0.239005	retina	mouse_NMDA_36hr	zebrafish_LD_36hr
0.190781	0.261256	0.252358	0.223609	retina	mouse_NMDA_36hr	zebrafish_LD_20hr
0.23128	0.315027	0.32147	0.260089	retina	mouse_NMDA_36hr	zebrafish_LD_10hr
0.20854	0.217362	0.222446	0.225365	retina	mouse_NMDA_36hr	zebrafish_LD_4hr
0.387905	0.558813	0.528355	0.352534	retina	mouse_NMDA_24hr	zebrafish_TNFa_Adult
0.331834	0.411837	0.442189	0.357001	retina	mouse_NMDA_24hr	zebrafish_TNFa_72hr
0.342588	0.430871	0.466422	0.361385	retina	mouse_NMDA_24hr	zebrafish_TNFa_36hr
0.405865	0.591689	0.58081	0.425016	retina	mouse_NMDA_24hr	zebrafish_TNFa_20hr
0.409553	0.581122	0.577951	0.444256	retina	mouse_NMDA_24hr	zebrafish_TNFa_10hr
0.400082	0.589898	0.551706	0.362047	retina	mouse_NMDA_24hr	zebrafish_NMDA_Adult
0.405006	0.515538	0.550322	0.4372	retina	mouse_NMDA_24hr	zebrafish_NMDA_36hr
0.414787	0.546144	0.580708	0.437635	retina	mouse_NMDA_24hr	zebrafish_NMDA_20hr
0.337998	0.375879	0.389042	0.325705	retina	mouse_NMDA_24hr	zebrafish_NMDA_10hr
0.34848	0.440101	0.419115	0.33889	retina	mouse_NMDA_24hr	zebrafish_NMDA_4hr
0.414297	0.554321	0.524917	0.357552	retina	mouse_NMDA_24hr	zebrafish_LD_Adult
0.296877	0.302704	0.362369	0.285509	retina	mouse_NMDA_24hr	zebrafish_LD_36hr
0.286491	0.304786	0.331515	0.261638	retina	mouse_NMDA_24hr	zebrafish_LD_20hr
0.317769	0.371172	0.392652	0.302622	retina	mouse_NMDA_24hr	zebrafish_LD_10hr
0.338108	0.404026	0.420144	0.309612	retina	mouse_NMDA_24hr	zebrafish_LD_4hr
0.326944	0.478888	0.451014	0.282625	retina	mouse_NMDA_12hr	zebrafish_TNFa_Adult
0.330473	0.412894	0.428571	0.329587	retina	mouse_NMDA_12hr	zebrafish_TNFa_72hr
0.331895	0.425989	0.451428	0.331166	retina	mouse_NMDA_12hr	zebrafish_TNFa_36hr
0.375915	0.471341	0.490366	0.358457	retina	mouse_NMDA_12hr	zebrafish_TNFa_20hr
0.373681	0.498255	0.501382	0.378446	retina	mouse_NMDA_12hr	zebrafish_TNFa_10hr
0.339725	0.499642	0.473698	0.298393	retina	mouse_NMDA_12hr	zebrafish_NMDA_Adult
0.365721	0.453104	0.469757	0.378502	retina	mouse_NMDA_12hr	zebrafish_NMDA_36hr
0.366964	0.459345	0.491636	0.379898	retina	mouse_NMDA_12hr	zebrafish_NMDA_20hr
0.319183	0.408342	0.39158	0.309263	retina	mouse_NMDA_12hr	zebrafish_NMDA_10hr
0.317397	0.372946	0.351564	0.29493	retina	mouse_NMDA_12hr	zebrafish_NMDA_4hr
0.35302	0.457279	0.441109	0.298693	retina	mouse_NMDA_12hr	zebrafish_LD_Adult
0.28431	0.29592	0.351075	0.272724	retina	mouse_NMDA_12hr	zebrafish_LD_36hr
0.259013	0.31275	0.304393	0.236893	retina	mouse_NMDA_12hr	zebrafish_LD_20hr
0.312373	0.293954	0.321852	0.274638	retina	mouse_NMDA_12hr	zebrafish_LD_10hr
0.29781	0.290055	0.310216	0.263203	retina	mouse_NMDA_12hr	zebrafish_LD_4hr
0.334223	0.470226	0.454503	0.300275	retina	mouse_NMDA_6hr	zebrafish_TNFa_Adult
0.300377	0.439379	0.426428	0.31807	retina	mouse_NMDA_6hr	zebrafish_TNFa_72hr
0.333569	0.457616	0.471048	0.346898	retina	mouse_NMDA_6hr	zebrafish_TNFa_36hr
0.379191	0.510033	0.512387	0.379557	retina	mouse_NMDA_6hr	zebrafish_TNFa_20hr
0.358418	0.493883	0.493397	0.39366	retina	mouse_NMDA_6hr	zebrafish_TNFa_10hr
0.356205	0.491867	0.47652	0.31611	retina	mouse_NMDA_6hr	zebrafish_NMDA_Adult
0.384748	0.459092	0.486366	0.408118	retina	mouse_NMDA_6hr	zebrafish_NMDA_36hr
0.385926	0.500488	0.525527	0.413353	retina	mouse_NMDA_6hr	zebrafish_NMDA_20hr
0.338343	0.422074	0.404273	0.32624	retina	mouse_NMDA_6hr	zebrafish_NMDA_10hr
0.330863	0.401896	0.379044	0.315403	retina	mouse_NMDA_6hr	zebrafish_NMDA_4hr
0.374759	0.485561	0.468412	0.325875	retina	mouse_NMDA_6hr	zebrafish_LD_Adult
0.284323	0.299987	0.348718	0.273813	retina	mouse_NMDA_6hr	zebrafish_LD_36hr
0.255257	0.308941	0.28862	0.23315	retina	mouse_NMDA_6hr	zebrafish_LD_20hr
0.309323	0.339785	0.345006	0.274141	retina	mouse_NMDA_6hr	zebrafish_LD_10hr
0.282027	0.307181	0.300144	0.272161	retina	mouse_NMDA_6hr	zebrafish_LD_4hr
0.351893	0.526322	0.496946	0.326214	retina	mouse_NMDA_3hr	zebrafish_TNFa_Adult
0.324762	0.477971	0.467659	0.347121	retina	mouse_NMDA_3hr	zebrafish_TNFa_72hr
0.341224	0.467209	0.476312	0.35247	retina	mouse_NMDA_3hr	zebrafish_TNFa_36hr
0.392183	0.554546	0.550334	0.405804	retina	mouse_NMDA_3hr	zebrafish_TNFa_20hr
0.384561	0.541666	0.539052	0.424142	retina	mouse_NMDA_3hr	zebrafish_TNFa_10hr
0.384385	0.55611	0.529484	0.338564	retina	mouse_NMDA_3hr	zebrafish_NMDA_Adult
0.39934	0.547095	0.560486	0.429174	retina	mouse_NMDA_3hr	zebrafish_NMDA_36hr
0.39457	0.518759	0.547686	0.416153	retina	mouse_NMDA_3hr	zebrafish_NMDA_20hr
0.354413	0.423915	0.420986	0.332827	retina	mouse_NMDA_3hr	zebrafish_NMDA_10hr
0.366358	0.476982	0.45553	0.35271	retina	mouse_NMDA_3hr	zebrafish_NMDA_4hr
0.401721	0.542733	0.518296	0.345906	retina	mouse_NMDA_3hr	zebrafish_LD_Adult
0.305612	0.406483	0.449769	0.275946	retina	mouse_NMDA_3hr	zebrafish_LD_36hr
0.29045	0.344475	0.347583	0.238484	retina	mouse_NMDA_3hr	zebrafish_LD_20hr
0.353887	0.413299	0.42212	0.287959	retina	mouse_NMDA_3hr	zebrafish_LD_10hr
0.319235	0.342005	0.353094	0.289891	retina	mouse_NMDA_3hr	zebrafish_LD_4hr
0.339466	0.609594	0.551039	0.342805	retina	Macosko	zebrafish_TNFa_Adult
0.312875	0.525931	0.511915	0.368566	retina	Macosko	zebrafish_TNFa_72hr
0.331662	0.552285	0.541554	0.370461	retina	Macosko	zebrafish_TNFa_36hr
0.403892	0.649719	0.610893	0.446218	retina	Macosko	zebrafish_TNFa_20hr
0.375796	0.621176	0.596069	0.449999	retina	Macosko	zebrafish_TNFa_10hr
0.34403	0.61098	0.547139	0.346136	retina	Macosko	zebrafish_NMDA_Adult
0.340078	0.49847	0.508676	0.415737	retina	Macosko	zebrafish_NMDA_36hr
0.378792	0.554465	0.575929	0.433922	retina	Macosko	zebrafish_NMDA_20hr
0.329667	0.461302	0.435583	0.348563	retina	Macosko	zebrafish_NMDA_10hr
0.326777	0.495751	0.449303	0.358058	retina	Macosko	zebrafish_NMDA_4hr
0.362065	0.60988	0.545548	0.353297	retina	Macosko	zebrafish_LD_Adult
0.282002	0.41756	0.45517	0.302333	retina	Macosko	zebrafish_LD_36hr
0.259786	0.373276	0.365271	0.260042	retina	Macosko	zebrafish_LD_20hr
0.302331	0.427414	0.417719	0.317067	retina	Macosko	zebrafish_LD_10hr
0.32751	0.436274	0.436259	0.339309	retina	Macosko	zebrafish_LD_4hr
0.253848	0.462498	0.473346	0.45295	retina	chick_P10	Menon_microfluidics
0.400612	0.750094	0.764163	0.574513	retina	chick_P10	Menon_seqwell
0.279933	0.725429	0.67403	0.382421	retina	chick_P10	mouse_LD_P60
0.328316	0.720402	0.705845	0.462825	retina	chick_P10	mouse_LD_24hr
0.291172	0.766875	0.724847	0.433076	retina	chick_P10	mouse_LD_10hr
0.302683	0.692202	0.681319	0.419785	retina	chick_P10	mouse_LD_4hr
0.341974	0.817191	0.798208	0.462461	retina	chick_P10	mouse_LD_0hr
0.29419	0.733647	0.693715	0.444703	retina	chick_P10	mouse_NMDA_P60
0.376944	0.818913	0.819761	0.558929	retina	chick_P10	mouse_NMDA_72hr
0.340505	0.83029	0.810368	0.573874	retina	chick_P10	mouse_NMDA_48hr
0.310741	0.800619	0.80356	0.630648	retina	chick_P10	mouse_NMDA_36hr
0.305241	0.693008	0.689318	0.516414	retina	chick_P10	mouse_NMDA_24hr
0.232657	0.564254	0.55787	0.356656	retina	chick_P10	mouse_NMDA_12hr
0.30549	0.690883	0.675589	0.433928	retina	chick_P10	mouse_NMDA_6hr
0.301496	0.708618	0.698603	0.44417	retina	chick_P10	mouse_NMDA_3hr
0.217824	0.430955	0.369086	0.275244	retina	chick_P10	Macosko
0.225311	0.545196	0.505876	0.334079	retina	chick_P10	zebrafish_TNFa_Adult
0.176852	0.331126	0.330601	0.283431	retina	chick_P10	zebrafish_TNFa_72hr
0.197905	0.430903	0.416494	0.291793	retina	chick_P10	zebrafish_TNFa_36hr
0.217786	0.540968	0.494691	0.358941	retina	chick_P10	zebrafish_TNFa_20hr
0.228006	0.516623	0.488177	0.363821	retina	chick_P10	zebrafish_TNFa_10hr
0.228178	0.536825	0.496023	0.34073	retina	chick_P10	zebrafish_NMDA_Adult
0.216004	0.383918	0.412246	0.355197	retina	chick_P10	zebrafish_NMDA_36hr
0.237037	0.50912	0.512926	0.381304	retina	chick_P10	zebrafish_NMDA_20hr
0.21111	0.383396	0.37381	0.296124	retina	chick_P10	zebrafish_NMDA_10hr
0.222386	0.451986	0.416272	0.344613	retina	chick_P10	zebrafish_NMDA_4hr
0.230087	0.54316	0.484937	0.343136	retina	chick_P10	zebrafish_LD_Adult
0.160855	0.233074	0.279387	0.252969	retina	chick_P10	zebrafish_LD_36hr
0.181884	0.422711	0.392689	0.221227	retina	chick_P10	zebrafish_LD_20hr
0.205941	0.441191	0.411213	0.256492	retina	chick_P10	zebrafish_LD_10hr
0.182948	0.4357	0.38705	0.300726	retina	chick_P10	zebrafish_LD_4hr
0.196292	0.242876	0.277139	0.257344	retina	zebrafish_TNFa_Adult	Menon_microfluidics
0.27365	0.349089	0.387007	0.423206	retina	zebrafish_TNFa_Adult	Menon_seqwell
0.213434	0.265249	0.289981	0.248657	retina	zebrafish_TNFa_72hr	Menon_microfluidics
0.292408	0.360292	0.411946	0.429308	retina	zebrafish_TNFa_72hr	Menon_seqwell
0.227299	0.224854	0.261659	0.18297	retina	zebrafish_TNFa_36hr	Menon_microfluidics
0.301858	0.332603	0.38947	0.416578	retina	zebrafish_TNFa_36hr	Menon_seqwell
0.191337	0.153555	0.195112	0.222366	retina	zebrafish_TNFa_20hr	Menon_microfluidics
0.277644	0.330338	0.371921	0.372769	retina	zebrafish_TNFa_20hr	Menon_seqwell
0.213668	0.190977	0.231248	0.25072	retina	zebrafish_TNFa_10hr	Menon_microfluidics
0.316366	0.433361	0.453202	0.44806	retina	zebrafish_TNFa_10hr	Menon_seqwell
0.221062	0.196318	0.298143	0.283951	retina	zebrafish_NMDA_Adult	Menon_microfluidics
0.356133	0.475297	0.541256	0.474821	retina	zebrafish_NMDA_Adult	Menon_seqwell
0.241421	0.208516	0.271266	0.241341	retina	zebrafish_NMDA_36hr	Menon_microfluidics
0.350987	0.396095	0.47383	0.469895	retina	zebrafish_NMDA_36hr	Menon_seqwell
0.251999	0.23331	0.328456	0.310173	retina	zebrafish_NMDA_20hr	Menon_microfluidics
0.318526	0.37875	0.463054	0.445438	retina	zebrafish_NMDA_20hr	Menon_seqwell
0.188262	0.123158	0.206062	0.183569	retina	zebrafish_NMDA_10hr	Menon_microfluidics
0.342958	0.355071	0.439039	0.394802	retina	zebrafish_NMDA_10hr	Menon_seqwell
0.2126	0.186627	0.292818	0.245717	retina	zebrafish_NMDA_4hr	Menon_microfluidics
0.36918	0.467536	0.53633	0.446801	retina	zebrafish_NMDA_4hr	Menon_seqwell
0.229877	0.311784	0.394804	0.260103	retina	zebrafish_LD_Adult	Menon_microfluidics
0.373488	0.493854	0.545259	0.404832	retina	zebrafish_LD_Adult	Menon_seqwell
0.252695	0.298971	0.362252	0.220311	retina	zebrafish_LD_36hr	Menon_microfluidics
0.330579	0.449791	0.508929	0.460019	retina	zebrafish_LD_36hr	Menon_seqwell
0.207128	0.212583	0.285551	0.190418	retina	zebrafish_LD_20hr	Menon_microfluidics
0.336919	0.527034	0.531096	0.386746	retina	zebrafish_LD_20hr	Menon_seqwell
0.23037	0.345634	0.389826	0.15843	retina	zebrafish_LD_10hr	Menon_microfluidics
0.337304	0.498633	0.526478	0.411284	retina	zebrafish_LD_10hr	Menon_seqwell
0.1785	0.277314	0.344483	0.188653	retina	zebrafish_LD_4hr	Menon_microfluidics
0.363572	0.512116	0.543411	0.396396	retina	zebrafish_LD_4hr	Menon_seqwell
0.285815	0.45721	0.46834	0.268297	retina	zebrafish_TNFa_Adult	mouse_LD_P60
0.314269	0.491756	0.525021	0.306628	retina	zebrafish_TNFa_Adult	mouse_LD_24hr
0.312485	0.512289	0.499294	0.313234	retina	zebrafish_TNFa_Adult	mouse_LD_10hr
0.345391	0.418017	0.443116	0.318302	retina	zebrafish_TNFa_Adult	mouse_LD_4hr
0.359468	0.484069	0.519459	0.288676	retina	zebrafish_TNFa_Adult	mouse_LD_0hr
0.28818	0.498424	0.522717	0.31948	retina	zebrafish_TNFa_Adult	mouse_NMDA_P60
0.355268	0.543595	0.545349	0.384562	retina	zebrafish_TNFa_Adult	mouse_NMDA_72hr
0.347165	0.4813	0.51879	0.486131	retina	zebrafish_TNFa_Adult	mouse_NMDA_48hr
0.32513	0.365827	0.391608	0.396929	retina	zebrafish_TNFa_Adult	mouse_NMDA_36hr
0.259124	0.392324	0.402241	0.324957	retina	zebrafish_TNFa_Adult	mouse_NMDA_24hr
0.188145	0.272729	0.297988	0.297871	retina	zebrafish_TNFa_Adult	mouse_NMDA_12hr
0.233793	0.314324	0.336666	0.314324	retina	zebrafish_TNFa_Adult	mouse_NMDA_6hr
0.333695	0.382315	0.415883	0.322997	retina	zebrafish_TNFa_Adult	mouse_NMDA_3hr
0.194527	0.292214	0.285641	0.201572	retina	zebrafish_TNFa_Adult	Macosko
0.287989	0.403982	0.401809	0.268982	retina	zebrafish_TNFa_72hr	mouse_LD_P60
0.31433	0.362031	0.399706	0.24567	retina	zebrafish_TNFa_72hr	mouse_LD_24hr
0.358527	0.398256	0.426935	0.326176	retina	zebrafish_TNFa_72hr	mouse_LD_10hr
0.332015	0.390913	0.392372	0.301946	retina	zebrafish_TNFa_72hr	mouse_LD_4hr
0.386939	0.483391	0.493279	0.306646	retina	zebrafish_TNFa_72hr	mouse_LD_0hr
0.271624	0.403608	0.408042	0.281543	retina	zebrafish_TNFa_72hr	mouse_NMDA_P60
0.338611	0.478647	0.458124	0.365851	retina	zebrafish_TNFa_72hr	mouse_NMDA_72hr
0.389305	0.60213	0.594912	0.500389	retina	zebrafish_TNFa_72hr	mouse_NMDA_48hr
0.303588	0.507788	0.492053	0.44281	retina	zebrafish_TNFa_72hr	mouse_NMDA_36hr
0.284297	0.392522	0.355269	0.322623	retina	zebrafish_TNFa_72hr	mouse_NMDA_24hr
0.285268	0.349321	0.326627	0.307805	retina	zebrafish_TNFa_72hr	mouse_NMDA_12hr
0.284803	0.369643	0.371171	0.276592	retina	zebrafish_TNFa_72hr	mouse_NMDA_6hr
0.335352	0.367038	0.389008	0.320207	retina	zebrafish_TNFa_72hr	mouse_NMDA_3hr
0.207399	0.268532	0.2317	0.207631	retina	zebrafish_TNFa_72hr	Macosko
0.336324	0.45524	0.46054	0.249851	retina	zebrafish_TNFa_36hr	mouse_LD_P60
0.387359	0.497212	0.51619	0.254713	retina	zebrafish_TNFa_36hr	mouse_LD_24hr
0.397939	0.50801	0.522053	0.312275	retina	zebrafish_TNFa_36hr	mouse_LD_10hr
0.408304	0.521016	0.529735	0.30805	retina	zebrafish_TNFa_36hr	mouse_LD_4hr
0.434179	0.502307	0.514451	0.310147	retina	zebrafish_TNFa_36hr	mouse_LD_0hr
0.352947	0.491787	0.509508	0.301542	retina	zebrafish_TNFa_36hr	mouse_NMDA_P60
0.364034	0.62104	0.598997	0.384045	retina	zebrafish_TNFa_36hr	mouse_NMDA_72hr
0.452853	0.739279	0.740412	0.49092	retina	zebrafish_TNFa_36hr	mouse_NMDA_48hr
0.357339	0.585562	0.588684	0.414776	retina	zebrafish_TNFa_36hr	mouse_NMDA_36hr
0.397601	0.523467	0.489986	0.329843	retina	zebrafish_TNFa_36hr	mouse_NMDA_24hr
0.282229	0.393443	0.401183	0.28262	retina	zebrafish_TNFa_36hr	mouse_NMDA_12hr
0.307025	0.398523	0.412286	0.254122	retina	zebrafish_TNFa_36hr	mouse_NMDA_6hr
0.40022	0.501132	0.527412	0.289383	retina	zebrafish_TNFa_36hr	mouse_NMDA_3hr
0.260668	0.285364	0.274594	0.185759	retina	zebrafish_TNFa_36hr	Macosko
0.316023	0.527491	0.518091	0.286014	retina	zebrafish_TNFa_20hr	mouse_LD_P60
0.345115	0.441636	0.479394	0.292726	retina	zebrafish_TNFa_20hr	mouse_LD_24hr
0.332873	0.468957	0.488934	0.326659	retina	zebrafish_TNFa_20hr	mouse_LD_10hr
0.333082	0.432349	0.455074	0.317143	retina	zebrafish_TNFa_20hr	mouse_LD_4hr
0.315467	0.387825	0.42133	0.26029	retina	zebrafish_TNFa_20hr	mouse_LD_0hr
0.304796	0.471407	0.493831	0.302076	retina	zebrafish_TNFa_20hr	mouse_NMDA_P60
0.323732	0.559025	0.556156	0.365976	retina	zebrafish_TNFa_20hr	mouse_NMDA_72hr
0.443114	0.71249	0.730969	0.498638	retina	zebrafish_TNFa_20hr	mouse_NMDA_48hr
0.297601	0.519473	0.553719	0.433548	retina	zebrafish_TNFa_20hr	mouse_NMDA_36hr
0.308316	0.4292	0.411063	0.328569	retina	zebrafish_TNFa_20hr	mouse_NMDA_24hr
0.226932	0.294365	0.305325	0.302143	retina	zebrafish_TNFa_20hr	mouse_NMDA_12hr
0.284415	0.361217	0.374395	0.317787	retina	zebrafish_TNFa_20hr	mouse_NMDA_6hr
0.310365	0.323359	0.369256	0.323323	retina	zebrafish_TNFa_20hr	mouse_NMDA_3hr
0.276332	0.291756	0.25761	0.217685	retina	zebrafish_TNFa_20hr	Macosko
0.292128	0.418015	0.408364	0.281396	retina	zebrafish_TNFa_10hr	mouse_LD_P60
0.347702	0.520957	0.543314	0.309084	retina	zebrafish_TNFa_10hr	mouse_LD_24hr
0.365136	0.493072	0.49537	0.344223	retina	zebrafish_TNFa_10hr	mouse_LD_10hr
0.361909	0.428554	0.450549	0.328583	retina	zebrafish_TNFa_10hr	mouse_LD_4hr
0.392566	0.541781	0.551436	0.294214	retina	zebrafish_TNFa_10hr	mouse_LD_0hr
0.302097	0.420258	0.446364	0.314848	retina	zebrafish_TNFa_10hr	mouse_NMDA_P60
0.340659	0.505471	0.504052	0.390399	retina	zebrafish_TNFa_10hr	mouse_NMDA_72hr
0.401813	0.597758	0.631721	0.458134	retina	zebrafish_TNFa_10hr	mouse_NMDA_48hr
0.296306	0.45632	0.491418	0.433519	retina	zebrafish_TNFa_10hr	mouse_NMDA_36hr
0.288861	0.381051	0.365284	0.361187	retina	zebrafish_TNFa_10hr	mouse_NMDA_24hr
0.271244	0.284454	0.303669	0.350484	retina	zebrafish_TNFa_10hr	mouse_NMDA_12hr
0.270896	0.287111	0.322154	0.336978	retina	zebrafish_TNFa_10hr	mouse_NMDA_6hr
0.318115	0.367021	0.402849	0.298722	retina	zebrafish_TNFa_10hr	mouse_NMDA_3hr
0.246013	0.258255	0.244309	0.21446	retina	zebrafish_TNFa_10hr	Macosko
0.259466	0.425876	0.460606	0.272208	retina	zebrafish_NMDA_Adult	mouse_LD_P60
0.312386	0.378558	0.439445	0.288548	retina	zebrafish_NMDA_Adult	mouse_LD_24hr
0.300758	0.437793	0.463977	0.317931	retina	zebrafish_NMDA_Adult	mouse_LD_10hr
0.325979	0.351949	0.41435	0.300379	retina	zebrafish_NMDA_Adult	mouse_LD_4hr
0.341805	0.423676	0.473513	0.291145	retina	zebrafish_NMDA_Adult	mouse_LD_0hr
0.265556	0.444749	0.489331	0.311804	retina	zebrafish_NMDA_Adult	mouse_NMDA_P60
0.348816	0.53568	0.575068	0.415346	retina	zebrafish_NMDA_Adult	mouse_NMDA_72hr
0.351287	0.496968	0.564271	0.476594	retina	zebrafish_NMDA_Adult	mouse_NMDA_48hr
0.315781	0.426205	0.506039	0.440802	retina	zebrafish_NMDA_Adult	mouse_NMDA_36hr
0.296764	0.453141	0.497854	0.360698	retina	zebrafish_NMDA_Adult	mouse_NMDA_24hr
0.197805	0.277404	0.337751	0.304379	retina	zebrafish_NMDA_Adult	mouse_NMDA_12hr
0.215029	0.271776	0.321832	0.302378	retina	zebrafish_NMDA_Adult	mouse_NMDA_6hr
0.317393	0.378403	0.425423	0.31189	retina	zebrafish_NMDA_Adult	mouse_NMDA_3hr
0.229837	0.315823	0.381673	0.22982	retina	zebrafish_NMDA_Adult	Macosko
0.358959	0.438334	0.467881	0.285263	retina	zebrafish_NMDA_36hr	mouse_LD_P60
0.410893	0.389922	0.438604	0.307386	retina	zebrafish_NMDA_36hr	mouse_LD_24hr
0.405886	0.482266	0.515618	0.348012	retina	zebrafish_NMDA_36hr	mouse_LD_10hr
0.408563	0.52175	0.544926	0.350562	retina	zebrafish_NMDA_36hr	mouse_LD_4hr
0.441735	0.53214	0.549152	0.342945	retina	zebrafish_NMDA_36hr	mouse_LD_0hr
0.349671	0.463906	0.504863	0.306483	retina	zebrafish_NMDA_36hr	mouse_NMDA_P60
0.410567	0.546546	0.594365	0.416567	retina	zebrafish_NMDA_36hr	mouse_NMDA_72hr
0.446774	0.556795	0.629987	0.506856	retina	zebrafish_NMDA_36hr	mouse_NMDA_48hr
0.395377	0.648432	0.692943	0.479205	retina	zebrafish_NMDA_36hr	mouse_NMDA_36hr
0.417166	0.551202	0.570339	0.391675	retina	zebrafish_NMDA_36hr	mouse_NMDA_24hr
0.329784	0.367699	0.400947	0.317372	retina	zebrafish_NMDA_36hr	mouse_NMDA_12hr
0.343848	0.418165	0.439536	0.311429	retina	zebrafish_NMDA_36hr	mouse_NMDA_6hr
0.439856	0.516299	0.523515	0.366331	retina	zebrafish_NMDA_36hr	mouse_NMDA_3hr
0.326907	0.412035	0.480026	0.240132	retina	zebrafish_NMDA_36hr	Macosko
0.327082	0.36976	0.415378	0.287815	retina	zebrafish_NMDA_20hr	mouse_LD_P60
0.359548	0.282584	0.333263	0.314777	retina	zebrafish_NMDA_20hr	mouse_LD_24hr
0.353747	0.357651	0.409198	0.352375	retina	zebrafish_NMDA_20hr	mouse_LD_10hr
0.320901	0.269354	0.319005	0.330809	retina	zebrafish_NMDA_20hr	mouse_LD_4hr
0.35883	0.32237	0.373188	0.308408	retina	zebrafish_NMDA_20hr	mouse_LD_0hr
0.298449	0.333635	0.396429	0.333406	retina	zebrafish_NMDA_20hr	mouse_NMDA_P60
0.349015	0.422819	0.482053	0.424376	retina	zebrafish_NMDA_20hr	mouse_NMDA_72hr
0.411493	0.379721	0.463288	0.50525	retina	zebrafish_NMDA_20hr	mouse_NMDA_48hr
0.338864	0.534165	0.600763	0.442155	retina	zebrafish_NMDA_20hr	mouse_NMDA_36hr
0.375149	0.447086	0.49547	0.357037	retina	zebrafish_NMDA_20hr	mouse_NMDA_24hr
0.280807	0.260724	0.313373	0.342365	retina	zebrafish_NMDA_20hr	mouse_NMDA_12hr
0.312615	0.316827	0.381651	0.316907	retina	zebrafish_NMDA_20hr	mouse_NMDA_6hr
0.35856	0.334933	0.40688	0.335502	retina	zebrafish_NMDA_20hr	mouse_NMDA_3hr
0.286722	0.279	0.338065	0.225985	retina	zebrafish_NMDA_20hr	Macosko
0.259425	0.323919	0.36779	0.238268	retina	zebrafish_NMDA_10hr	mouse_LD_P60
0.357227	0.358167	0.400126	0.286471	retina	zebrafish_NMDA_10hr	mouse_LD_24hr
0.331295	0.342642	0.387223	0.306329	retina	zebrafish_NMDA_10hr	mouse_LD_10hr
0.316081	0.298347	0.359729	0.275592	retina	zebrafish_NMDA_10hr	mouse_LD_4hr
0.370335	0.365248	0.404375	0.277034	retina	zebrafish_NMDA_10hr	mouse_LD_0hr
0.265937	0.317823	0.374655	0.245392	retina	zebrafish_NMDA_10hr	mouse_NMDA_P60
0.309411	0.418885	0.45851	0.341228	retina	zebrafish_NMDA_10hr	mouse_NMDA_72hr
0.38989	0.422234	0.51031	0.45501	retina	zebrafish_NMDA_10hr	mouse_NMDA_48hr
0.285547	0.444246	0.513032	0.376747	retina	zebrafish_NMDA_10hr	mouse_NMDA_36hr
0.321677	0.43316	0.471149	0.316531	retina	zebrafish_NMDA_10hr	mouse_NMDA_24hr
0.285223	0.343137	0.368047	0.281681	retina	zebrafish_NMDA_10hr	mouse_NMDA_12hr
0.275223	0.221535	0.274428	0.255282	retina	zebrafish_NMDA_10hr	mouse_NMDA_6hr
0.343937	0.315101	0.372615	0.300529	retina	zebrafish_NMDA_10hr	mouse_NMDA_3hr
0.274986	0.364112	0.430414	0.194096	retina	zebrafish_NMDA_10hr	Macosko
0.300386	0.423816	0.47011	0.272539	retina	zebrafish_NMDA_4hr	mouse_LD_P60
0.322868	0.411054	0.461733	0.281133	retina	zebrafish_NMDA_4hr	mouse_LD_24hr
0.339932	0.395935	0.445142	0.34748	retina	zebrafish_NMDA_4hr	mouse_LD_10hr
0.328844	0.344312	0.388817	0.290475	retina	zebrafish_NMDA_4hr	mouse_LD_4hr
0.360868	0.434192	0.469823	0.292405	retina	zebrafish_NMDA_4hr	mouse_LD_0hr
0.294134	0.42988	0.495427	0.305698	retina	zebrafish_NMDA_4hr	mouse_NMDA_P60
0.330772	0.493794	0.556928	0.422515	retina	zebrafish_NMDA_4hr	mouse_NMDA_72hr
0.376549	0.488876	0.572557	0.486289	retina	zebrafish_NMDA_4hr	mouse_NMDA_48hr
0.356745	0.535901	0.609027	0.477212	retina	zebrafish_NMDA_4hr	mouse_NMDA_36hr
0.325203	0.482369	0.531712	0.391508	retina	zebrafish_NMDA_4hr	mouse_NMDA_24hr
0.23359	0.236016	0.28071	0.290904	retina	zebrafish_NMDA_4hr	mouse_NMDA_12hr
0.267214	0.340241	0.381167	0.318291	retina	zebrafish_NMDA_4hr	mouse_NMDA_6hr
0.323897	0.391563	0.42717	0.315923	retina	zebrafish_NMDA_4hr	mouse_NMDA_3hr
0.270536	0.343172	0.413051	0.245164	retina	zebrafish_NMDA_4hr	Macosko
0.272885	0.365212	0.386471	0.246895	retina	zebrafish_LD_Adult	mouse_LD_P60
0.302689	0.416563	0.447855	0.276752	retina	zebrafish_LD_Adult	mouse_LD_24hr
0.314444	0.395541	0.429289	0.299718	retina	zebrafish_LD_Adult	mouse_LD_10hr
0.358585	0.388377	0.41629	0.292335	retina	zebrafish_LD_Adult	mouse_LD_4hr
0.363767	0.40468	0.435123	0.279813	retina	zebrafish_LD_Adult	mouse_LD_0hr
0.28508	0.39657	0.438816	0.287922	retina	zebrafish_LD_Adult	mouse_NMDA_P60
0.360623	0.504011	0.496333	0.378632	retina	zebrafish_LD_Adult	mouse_NMDA_72hr
0.373393	0.571488	0.579688	0.457173	retina	zebrafish_LD_Adult	mouse_NMDA_48hr
0.328118	0.399676	0.454545	0.345634	retina	zebrafish_LD_Adult	mouse_NMDA_36hr
0.263269	0.383277	0.388412	0.294017	retina	zebrafish_LD_Adult	mouse_NMDA_24hr
0.198014	0.311958	0.332071	0.281113	retina	zebrafish_LD_Adult	mouse_NMDA_12hr
0.225757	0.248821	0.278136	0.284301	retina	zebrafish_LD_Adult	mouse_NMDA_6hr
0.335143	0.333373	0.376109	0.302503	retina	zebrafish_LD_Adult	mouse_NMDA_3hr
0.218949	0.324661	0.374353	0.210895	retina	zebrafish_LD_Adult	Macosko
0.367384	0.331979	0.350157	0.273876	retina	zebrafish_LD_36hr	mouse_LD_P60
0.373585	0.404448	0.429983	0.282124	retina	zebrafish_LD_36hr	mouse_LD_24hr
0.391251	0.35305	0.342175	0.336017	retina	zebrafish_LD_36hr	mouse_LD_10hr
0.390555	0.395033	0.417582	0.309543	retina	zebrafish_LD_36hr	mouse_LD_4hr
0.403161	0.384197	0.393657	0.289905	retina	zebrafish_LD_36hr	mouse_LD_0hr
0.356015	0.422962	0.457106	0.324649	retina	zebrafish_LD_36hr	mouse_NMDA_P60
0.404771	0.422147	0.421459	0.425006	retina	zebrafish_LD_36hr	mouse_NMDA_72hr
0.452121	0.606256	0.590094	0.505557	retina	zebrafish_LD_36hr	mouse_NMDA_48hr
0.354748	0.470034	0.488239	0.486267	retina	zebrafish_LD_36hr	mouse_NMDA_36hr
0.432563	0.433692	0.423462	0.381431	retina	zebrafish_LD_36hr	mouse_NMDA_24hr
0.323071	0.32038	0.323077	0.309496	retina	zebrafish_LD_36hr	mouse_NMDA_12hr
0.355968	0.389022	0.374718	0.293645	retina	zebrafish_LD_36hr	mouse_NMDA_6hr
0.421549	0.437964	0.434426	0.321782	retina	zebrafish_LD_36hr	mouse_NMDA_3hr
0.250616	0.258061	0.304655	0.19828	retina	zebrafish_LD_36hr	Macosko
0.304646	0.342241	0.32302	0.217908	retina	zebrafish_LD_20hr	mouse_LD_P60
0.325406	0.325602	0.335156	0.223412	retina	zebrafish_LD_20hr	mouse_LD_24hr
0.338961	0.32866	0.295558	0.278427	retina	zebrafish_LD_20hr	mouse_LD_10hr
0.36038	0.345027	0.33775	0.258958	retina	zebrafish_LD_20hr	mouse_LD_4hr
0.403431	0.402371	0.388123	0.287502	retina	zebrafish_LD_20hr	mouse_LD_0hr
0.2971	0.306434	0.334011	0.250903	retina	zebrafish_LD_20hr	mouse_NMDA_P60
0.418648	0.482197	0.474334	0.348424	retina	zebrafish_LD_20hr	mouse_NMDA_72hr
0.416171	0.508117	0.526498	0.45663	retina	zebrafish_LD_20hr	mouse_NMDA_48hr
0.367377	0.532984	0.518754	0.415006	retina	zebrafish_LD_20hr	mouse_NMDA_36hr
0.396492	0.467017	0.42227	0.307651	retina	zebrafish_LD_20hr	mouse_NMDA_24hr
0.310972	0.376931	0.376331	0.272629	retina	zebrafish_LD_20hr	mouse_NMDA_12hr
0.265352	0.256743	0.277169	0.215426	retina	zebrafish_LD_20hr	mouse_NMDA_6hr
0.325137	0.287225	0.302876	0.242862	retina	zebrafish_LD_20hr	mouse_NMDA_3hr
0.250498	0.353185	0.396983	0.181024	retina	zebrafish_LD_20hr	Macosko
0.28234	0.347149	0.328658	0.245529	retina	zebrafish_LD_10hr	mouse_LD_P60
0.323797	0.399327	0.40307	0.266319	retina	zebrafish_LD_10hr	mouse_LD_24hr
0.336571	0.365862	0.303092	0.263747	retina	zebrafish_LD_10hr	mouse_LD_10hr
0.334902	0.349336	0.332256	0.256178	retina	zebrafish_LD_10hr	mouse_LD_4hr
0.372594	0.415997	0.371343	0.285082	retina	zebrafish_LD_10hr	mouse_LD_0hr
0.296153	0.362006	0.377413	0.285648	retina	zebrafish_LD_10hr	mouse_NMDA_P60
0.342007	0.47059	0.426476	0.357111	retina	zebrafish_LD_10hr	mouse_NMDA_72hr
0.371489	0.524353	0.519175	0.469906	retina	zebrafish_LD_10hr	mouse_NMDA_48hr
0.290378	0.548959	0.497775	0.425778	retina	zebrafish_LD_10hr	mouse_NMDA_36hr
0.340093	0.487329	0.420839	0.290951	retina	zebrafish_LD_10hr	mouse_NMDA_24hr
0.295772	0.383216	0.376568	0.281676	retina	zebrafish_LD_10hr	mouse_NMDA_12hr
0.260664	0.304644	0.298613	0.246924	retina	zebrafish_LD_10hr	mouse_NMDA_6hr
0.289461	0.28705	0.311207	0.243488	retina	zebrafish_LD_10hr	mouse_NMDA_3hr
0.224383	0.382874	0.42334	0.181328	retina	zebrafish_LD_10hr	Macosko
0.283448	0.388353	0.351206	0.257481	retina	zebrafish_LD_4hr	mouse_LD_P60
0.301248	0.380589	0.372582	0.27076	retina	zebrafish_LD_4hr	mouse_LD_24hr
0.373833	0.394542	0.337467	0.318123	retina	zebrafish_LD_4hr	mouse_LD_10hr
0.340177	0.362144	0.347447	0.298936	retina	zebrafish_LD_4hr	mouse_LD_4hr
0.367536	0.463754	0.417904	0.324178	retina	zebrafish_LD_4hr	mouse_LD_0hr
0.266093	0.379087	0.3748	0.283543	retina	zebrafish_LD_4hr	mouse_NMDA_P60
0.354226	0.525499	0.45658	0.380474	retina	zebrafish_LD_4hr	mouse_NMDA_72hr
0.389183	0.55911	0.542879	0.519982	retina	zebrafish_LD_4hr	mouse_NMDA_48hr
0.296117	0.571557	0.507311	0.443512	retina	zebrafish_LD_4hr	mouse_NMDA_36hr
0.324259	0.499561	0.424416	0.322742	retina	zebrafish_LD_4hr	mouse_NMDA_24hr
0.261126	0.404154	0.378225	0.276564	retina	zebrafish_LD_4hr	mouse_NMDA_12hr
0.280616	0.377115	0.355369	0.271944	retina	zebrafish_LD_4hr	mouse_NMDA_6hr
0.330013	0.441992	0.41212	0.30478	retina	zebrafish_LD_4hr	mouse_NMDA_3hr
0.280687	0.510794	0.518791	0.198963	retina	zebrafish_LD_4hr	Macosko
0.22418	0.393814	0.459946	0.397481	retina	zebrafish_TNFa_Adult	chick_P10
0.253484	0.593414	0.62443	0.393377	retina	zebrafish_TNFa_72hr	chick_P10
0.254999	0.586065	0.622621	0.379596	retina	zebrafish_TNFa_36hr	chick_P10
0.267686	0.537284	0.602359	0.379861	retina	zebrafish_TNFa_20hr	chick_P10
0.242514	0.517165	0.571532	0.359915	retina	zebrafish_TNFa_10hr	chick_P10
0.237936	0.370289	0.460091	0.403595	retina	zebrafish_NMDA_Adult	chick_P10
0.267951	0.528095	0.602793	0.418804	retina	zebrafish_NMDA_36hr	chick_P10
0.238981	0.359318	0.450322	0.400475	retina	zebrafish_NMDA_20hr	chick_P10
0.249106	0.381765	0.473117	0.405427	retina	zebrafish_NMDA_10hr	chick_P10
0.24754	0.443306	0.528548	0.416602	retina	zebrafish_NMDA_4hr	chick_P10
0.236943	0.518749	0.56198	0.40425	retina	zebrafish_LD_Adult	chick_P10
0.200291	0.443015	0.473261	0.346321	retina	zebrafish_LD_36hr	chick_P10
0.201274	0.443866	0.47413	0.329459	retina	zebrafish_LD_20hr	chick_P10
0.230946	0.504908	0.526232	0.401296	retina	zebrafish_LD_10hr	chick_P10
0.204616	0.383298	0.426369	0.337169	retina	zebrafish_LD_4hr	chick_P10
0.483954	0.78349	0.769405	0.632984	pancreas	panc8	FACS
0.443014	0.601713	0.637858	0.532066	pancreas	panc8	Baron_mouse
0.385673	0.41724	0.454408	0.562796	pancreas	Baron_human	FACS
0.565486	0.599622	0.635207	0.512778	pancreas	Baron_human	Baron_mouse
0.368695	0.486717	0.531801	0.540948	pancreas	FACS	Baron_human
0.459073	0.660563	0.624927	0.542897	pancreas	Baron_mouse	Baron_human
0.226402	0.604642	0.190579	0.642518	kidney	Wang_Kidney	Quake_10x_Kidney
0.299669	0.445053	0.450546	0.589339	kidney	Wang_Kidney	Adam
0.1023	0.434589	0.481975	0.249924	kidney	Wang_Kidney	Park
0.1491	0.209849	0.290412	0.207197	kidney	Wang_Kidney	Karaiskos_mouse
0.235659	0.70525	0.25854	0.646814	kidney	Young	Quake_10x_Kidney
0.181925	0.335993	0.323497	0.58031	kidney	Young	Adam
0.0898309	0.3244	0.368545	0.22687	kidney	Young	Park
0.178304	0.648375	0.725336	0.381907	kidney	Young	Karaiskos_mouse
0.243039	0.771829	0.326861	0.711348	kidney	Wu_human	Quake_10x_Kidney
0.265982	0.396685	0.414208	0.604891	kidney	Wu_human	Adam
0.134004	0.404895	0.472191	0.314848	kidney	Wu_human	Park
0.185268	0.730924	0.78331	0.370686	kidney	Wu_human	Karaiskos_mouse
0.197767	0.663199	0.158216	0.499803	kidney	Hochane	Quake_10x_Kidney
0.252302	0.388781	0.375956	0.596251	kidney	Hochane	Adam
0.0804641	0.551783	0.512287	0.23336	kidney	Hochane	Park
0.412247	0.829152	0.869847	0.396224	kidney	Hochane	Karaiskos_mouse
0.107781	0.209214	0.142594	0.436128	kidney	Quake_10x_Kidney	Wang_Kidney
0.196536	0.339583	0.300088	0.523766	kidney	Quake_10x_Kidney	Young
0.196341	0.291616	0.361564	0.396854	kidney	Quake_10x_Kidney	Wu_human
0.145475	0.381451	0.0709298	0.359571	kidney	Quake_10x_Kidney	Hochane
0.187959	0.376377	0.279293	0.294848	kidney	Adam	Wang_Kidney
0.172418	0.374717	0.350044	0.609592	kidney	Adam	Young
0.287834	0.701017	0.676826	0.585484	kidney	Adam	Wu_human
0.294683	0.726546	0.637067	0.621578	kidney	Adam	Hochane
0.043427	0.110976	0.0692704	0.303815	kidney	Park	Wang_Kidney
0.156408	0.337202	0.326297	0.431735	kidney	Park	Young
0.206231	0.465106	0.510935	0.499861	kidney	Park	Wu_human
0.0758052	0.417588	0.389908	0.443274	kidney	Park	Hochane
0.156248	0.371218	0.250553	0.349146	kidney	Karaiskos_mouse	Wang_Kidney
0.139277	0.25473	0.16482	0.50406	kidney	Karaiskos_mouse	Young
0.21484	0.564684	0.424151	0.20164	kidney	Karaiskos_mouse	Wu_human
0.285274	0.532389	0.478091	0.456597	kidney	Karaiskos_mouse	Hochane

## Sheet: SCN
Supplemental Table 2d. Annotation metrics and CAMUS scores for SCN on cross-species data pairs.
SCN_f1_macro	SCN_f1_weight	SCN_ACC	CAMUS_score	tissue	reference	query
0.318677	0.857861	0.856781	0.337621	brain	Lake_2018	Tasic18
0.436445	0.848607	0.848868	0.644447	brain	Lake_2018	Quake_Smart-seq2_Brain_Non-Myeloid
0.210301	0.395794	0.456909	0.252524	brain	Lake_2018	Campbell
0.312658	0.619688	0.656713	0.486301	brain	Lake_2018	Chen
0.326363	0.445181	0.486984	0.355834	brain	Lake_2018	Tosches_lizard
0.323871	0.676616	0.691331	0.32685	brain	Lake_2018	Tosches_turtle
0.0394071	0.00338517	0.211596	0.0409092	brain	Tasic18	Lake_2018
0.176561	0.378737	0.399275	0.143384	brain	Quake_Smart-seq2_Brain_Non-Myeloid	Lake_2018
0.122705	0.091919	0.321375	0.134273	brain	Campbell	Lake_2018
0.232366	0.31211	0.4861	0.227018	brain	Chen	Lake_2018
0.121263	0.114697	0.364461	0.292932	brain	Tasic18	Tosches_lizard
0.231065	0.447893	0.556246	0.346303	brain	Quake_Smart-seq2_Brain_Non-Myeloid	Tosches_lizard
0.203795	0.535712	0.637449	0.47962	brain	Campbell	Tosches_lizard
0.225335	0.499779	0.556723	0.408014	brain	Chen	Tosches_lizard
0.13843	0.196729	0.466245	0.273297	brain	Tasic18	Tosches_turtle
0.167899	0.49889	0.55824	0.345026	brain	Quake_Smart-seq2_Brain_Non-Myeloid	Tosches_turtle
0.265442	0.602218	0.728408	0.463119	brain	Campbell	Tosches_turtle
0.360475	0.881163	0.892038	0.608674	brain	Chen	Tosches_turtle
0.171179	0.271724	0.395676	0.2026	brain	Tosches_lizard	Lake_2018
0.334386	0.974559	0.979107	0.471625	brain	Tosches_lizard	Tasic18
0.424225	0.681581	0.738312	0.607987	brain	Tosches_lizard	Quake_Smart-seq2_Brain_Non-Myeloid
0.255105	0.478681	0.545433	0.334205	brain	Tosches_lizard	Campbell
0.329217	0.629372	0.673009	0.535192	brain	Tosches_lizard	Chen
0.630047	0.635676	0.700279	0.549598	brain	Tosches_lizard	Tosches_turtle
0.155816	0.166818	0.365978	0.199877	brain	Tosches_turtle	Lake_2018
0.27515	0.962044	0.967123	0.475276	brain	Tosches_turtle	Tasic18
0.363781	0.587102	0.639518	0.637985	brain	Tosches_turtle	Quake_Smart-seq2_Brain_Non-Myeloid
0.222004	0.286392	0.43148	0.347626	brain	Tosches_turtle	Campbell
0.262202	0.530112	0.682604	0.521497	brain	Tosches_turtle	Chen
0.488536	0.501039	0.570098	0.517239	brain	Tosches_turtle	Tosches_lizard
0.349025	0.709767	0.725268	0.519661	testis	testis_human	testis_mouse
0.713558	0.875834	0.878836	0.614203	testis	testis_human	testis_monkey
0.292808	0.660585	0.614945	0.506906	testis	testis_mouse	testis_human
0.2734	0.76975	0.736906	0.541874	testis	testis_mouse	testis_monkey
0.505056	0.626625	0.645516	0.555402	testis	testis_monkey	testis_human
0.242292	0.648256	0.653509	0.475	testis	testis_monkey	testis_mouse
0.333692	0.325643	0.436156	0.302262	retina	Menon_microfluidics	mouse_LD_P60
0.364544	0.423782	0.489907	0.328375	retina	Menon_microfluidics	mouse_LD_24hr
0.323929	0.473276	0.547952	0.356689	retina	Menon_microfluidics	mouse_LD_10hr
0.409007	0.55559	0.627343	0.403182	retina	Menon_microfluidics	mouse_LD_4hr
0.386456	0.474125	0.573487	0.337228	retina	Menon_microfluidics	mouse_LD_0hr
0.317326	0.429415	0.516911	0.359125	retina	Menon_microfluidics	mouse_NMDA_P60
0.403538	0.530365	0.631416	0.434226	retina	Menon_microfluidics	mouse_NMDA_72hr
0.420728	0.573948	0.650222	0.452557	retina	Menon_microfluidics	mouse_NMDA_48hr
0.421077	0.626166	0.713287	0.518629	retina	Menon_microfluidics	mouse_NMDA_36hr
0.36534	0.451549	0.543872	0.388239	retina	Menon_microfluidics	mouse_NMDA_24hr
0.363459	0.562511	0.63858	0.453895	retina	Menon_microfluidics	mouse_NMDA_12hr
0.336952	0.421376	0.499516	0.354695	retina	Menon_microfluidics	mouse_NMDA_6hr
0.389178	0.480733	0.553212	0.357823	retina	Menon_microfluidics	mouse_NMDA_3hr
0.450253	0.730532	0.771581	0.393819	retina	Menon_microfluidics	Macosko
0.413598	0.475763	0.543393	0.348716	retina	Menon_seqwell	mouse_LD_P60
0.305276	0.277264	0.291421	0.237841	retina	Menon_seqwell	mouse_LD_24hr
0.449849	0.554826	0.634908	0.409	retina	Menon_seqwell	mouse_LD_10hr
0.377182	0.44812	0.550097	0.373168	retina	Menon_seqwell	mouse_LD_4hr
0.354619	0.379309	0.454537	0.301772	retina	Menon_seqwell	mouse_LD_0hr
0.368236	0.494951	0.518653	0.392333	retina	Menon_seqwell	mouse_NMDA_P60
0.375112	0.383913	0.421073	0.336961	retina	Menon_seqwell	mouse_NMDA_72hr
0.386332	0.493267	0.582	0.475104	retina	Menon_seqwell	mouse_NMDA_48hr
0.380806	0.599185	0.657343	0.459668	retina	Menon_seqwell	mouse_NMDA_36hr
0.417655	0.60628	0.657606	0.443967	retina	Menon_seqwell	mouse_NMDA_24hr
0.327272	0.626562	0.656568	0.427024	retina	Menon_seqwell	mouse_NMDA_12hr
0.404234	0.477502	0.513866	0.395491	retina	Menon_seqwell	mouse_NMDA_6hr
0.394604	0.425878	0.49261	0.383384	retina	Menon_seqwell	mouse_NMDA_3hr
0.448444	0.656742	0.711123	0.382919	retina	Menon_seqwell	Macosko
0.179332	0.334456	0.426369	0.278572	retina	Menon_microfluidics	chick_P10
0.162191	0.313807	0.259281	0.150526	retina	Menon_seqwell	chick_P10
0.0937545	0.142613	0.141699	0.121212	retina	Menon_microfluidics	zebrafish_TNFa_Adult
0.123755	0.238514	0.224184	0.141112	retina	Menon_microfluidics	zebrafish_TNFa_72hr
0.090018	0.149944	0.153932	0.113101	retina	Menon_microfluidics	zebrafish_TNFa_36hr
0.128882	0.201918	0.20114	0.0715427	retina	Menon_microfluidics	zebrafish_TNFa_20hr
0.127344	0.249301	0.214147	0.103199	retina	Menon_microfluidics	zebrafish_TNFa_10hr
0.138504	0.191709	0.184501	0.136271	retina	Menon_microfluidics	zebrafish_NMDA_Adult
0.122641	0.181486	0.18468	0.141582	retina	Menon_microfluidics	zebrafish_NMDA_36hr
0.116945	0.210495	0.173582	0.15209	retina	Menon_microfluidics	zebrafish_NMDA_20hr
0.123158	0.237197	0.189126	0.0963589	retina	Menon_microfluidics	zebrafish_NMDA_10hr
0.0848646	0.157132	0.140923	0.0752297	retina	Menon_microfluidics	zebrafish_NMDA_4hr
0.0996293	0.155774	0.14057	0.112128	retina	Menon_microfluidics	zebrafish_LD_Adult
0.0782426	0.189178	0.141216	0.114664	retina	Menon_microfluidics	zebrafish_LD_36hr
0.085998	0.119682	0.122199	0.095326	retina	Menon_microfluidics	zebrafish_LD_20hr
0.10294	0.0894515	0.115959	0.0806461	retina	Menon_microfluidics	zebrafish_LD_10hr
0.0756545	0.0926972	0.0984173	0.0741346	retina	Menon_microfluidics	zebrafish_LD_4hr
0.0686024	0.184909	0.142161	0.0691467	retina	Menon_seqwell	zebrafish_TNFa_Adult
0.0611103	0.0871325	0.125079	0.0464128	retina	Menon_seqwell	zebrafish_TNFa_72hr
0.0693302	0.215504	0.167969	0.103858	retina	Menon_seqwell	zebrafish_TNFa_36hr
0.147706	0.203614	0.198781	0.133538	retina	Menon_seqwell	zebrafish_TNFa_20hr
0.0830361	0.187734	0.164602	0.0569501	retina	Menon_seqwell	zebrafish_TNFa_10hr
0.0761071	0.177532	0.140878	0.0701643	retina	Menon_seqwell	zebrafish_NMDA_Adult
0.192175	0.263619	0.235746	0.218645	retina	Menon_seqwell	zebrafish_NMDA_36hr
0.0919605	0.178173	0.151423	0.125643	retina	Menon_seqwell	zebrafish_NMDA_20hr
0.04582	0.116727	0.09414	0.0556838	retina	Menon_seqwell	zebrafish_NMDA_10hr
0.0908678	0.186996	0.144037	0.0853981	retina	Menon_seqwell	zebrafish_NMDA_4hr
0.0783566	0.07975	0.0993585	0.0626572	retina	Menon_seqwell	zebrafish_LD_Adult
0.129122	0.211892	0.188059	0.141762	retina	Menon_seqwell	zebrafish_LD_36hr
0.110474	0.223437	0.190301	0.104695	retina	Menon_seqwell	zebrafish_LD_20hr
0.0659164	0.164226	0.125718	0.0779748	retina	Menon_seqwell	zebrafish_LD_10hr
0.113914	0.136372	0.156547	0.1391	retina	Menon_seqwell	zebrafish_LD_4hr
0.42442	0.508633	0.600816	0.366097	retina	mouse_LD_P60	Menon_microfluidics
0.48571	0.78353	0.809113	0.593714	retina	mouse_LD_P60	Menon_seqwell
0.388166	0.332906	0.459758	0.364059	retina	mouse_LD_24hr	Menon_microfluidics
0.581908	0.690255	0.757081	0.575498	retina	mouse_LD_24hr	Menon_seqwell
0.428912	0.44918	0.530884	0.34906	retina	mouse_LD_10hr	Menon_microfluidics
0.568173	0.76446	0.804495	0.5821	retina	mouse_LD_10hr	Menon_seqwell
0.427013	0.438587	0.552536	0.386591	retina	mouse_LD_4hr	Menon_microfluidics
0.619308	0.73373	0.79064	0.584099	retina	mouse_LD_4hr	Menon_seqwell
0.415035	0.583984	0.647902	0.392052	retina	mouse_LD_0hr	Menon_microfluidics
0.488793	0.48593	0.605296	0.52675	retina	mouse_LD_0hr	Menon_seqwell
0.36183	0.464886	0.560599	0.399674	retina	mouse_NMDA_P60	Menon_microfluidics
0.464244	0.534418	0.612069	0.502072	retina	mouse_NMDA_P60	Menon_seqwell
0.458349	0.521477	0.642726	0.38854	retina	mouse_NMDA_72hr	Menon_microfluidics
0.486007	0.505692	0.615148	0.541753	retina	mouse_NMDA_72hr	Menon_seqwell
0.399421	0.412409	0.532477	0.385934	retina	mouse_NMDA_48hr	Menon_microfluidics
0.553757	0.679962	0.749384	0.563354	retina	mouse_NMDA_48hr	Menon_seqwell
0.345774	0.285953	0.47922	0.349157	retina	mouse_NMDA_36hr	Menon_microfluidics
0.367131	0.326189	0.508621	0.46718	retina	mouse_NMDA_36hr	Menon_seqwell
0.397447	0.40923	0.535812	0.389474	retina	mouse_NMDA_24hr	Menon_microfluidics
0.569159	0.754194	0.788485	0.568734	retina	mouse_NMDA_24hr	Menon_seqwell
0.333526	0.437517	0.533672	0.339667	retina	mouse_NMDA_12hr	Menon_microfluidics
0.402006	0.446741	0.510468	0.4725	retina	mouse_NMDA_12hr	Menon_seqwell
0.384106	0.44749	0.5494	0.340566	retina	mouse_NMDA_6hr	Menon_microfluidics
0.485681	0.586849	0.686884	0.540242	retina	mouse_NMDA_6hr	Menon_seqwell
0.418469	0.56659	0.637848	0.405744	retina	mouse_NMDA_3hr	Menon_microfluidics
0.551037	0.761325	0.799569	0.584181	retina	mouse_NMDA_3hr	Menon_seqwell
0.452349	0.766136	0.78901	0.480694	retina	Macosko	Menon_microfluidics
0.563189	0.824762	0.846983	0.602216	retina	Macosko	Menon_seqwell
0.233708	0.490115	0.538679	0.391482	retina	mouse_LD_P60	chick_P10
0.235915	0.215113	0.293581	0.280224	retina	mouse_LD_24hr	chick_P10
0.265147	0.466502	0.500326	0.334121	retina	mouse_LD_10hr	chick_P10
0.245803	0.196387	0.296042	0.274954	retina	mouse_LD_4hr	chick_P10
0.204054	0.189279	0.22925	0.238244	retina	mouse_LD_0hr	chick_P10
0.260411	0.391837	0.476735	0.39757	retina	mouse_NMDA_P60	chick_P10
0.230599	0.349215	0.432014	0.31317	retina	mouse_NMDA_72hr	chick_P10
0.305429	0.161574	0.283667	0.289891	retina	mouse_NMDA_48hr	chick_P10
0.0594189	0.00710303	0.0797453	0.0463587	retina	mouse_NMDA_36hr	chick_P10
0.309741	0.255352	0.375715	0.310101	retina	mouse_NMDA_24hr	chick_P10
0.154879	0.0749815	0.156885	0.131973	retina	mouse_NMDA_12hr	chick_P10
0.184211	0.155597	0.196903	0.255341	retina	mouse_NMDA_6hr	chick_P10
0.273633	0.329018	0.455315	0.37359	retina	mouse_NMDA_3hr	chick_P10
0.349221	0.479521	0.583183	0.415552	retina	Macosko	chick_P10
0.227258	0.352398	0.357865	0.183655	retina	mouse_LD_P60	zebrafish_TNFa_Adult
0.176008	0.15829	0.221788	0.139219	retina	mouse_LD_P60	zebrafish_TNFa_72hr
0.210085	0.133759	0.233211	0.17367	retina	mouse_LD_P60	zebrafish_TNFa_36hr
0.189723	0.197076	0.255604	0.154871	retina	mouse_LD_P60	zebrafish_TNFa_20hr
0.222941	0.220448	0.269424	0.200571	retina	mouse_LD_P60	zebrafish_TNFa_10hr
0.142338	0.12079	0.202361	0.138839	retina	mouse_LD_P60	zebrafish_NMDA_Adult
0.228992	0.265312	0.31879	0.257774	retina	mouse_LD_P60	zebrafish_NMDA_36hr
0.208925	0.186475	0.246796	0.232403	retina	mouse_LD_P60	zebrafish_NMDA_20hr
0.154527	0.251524	0.228475	0.146224	retina	mouse_LD_P60	zebrafish_NMDA_10hr
0.176656	0.246374	0.234195	0.167383	retina	mouse_LD_P60	zebrafish_NMDA_4hr
0.181863	0.274985	0.290429	0.137788	retina	mouse_LD_P60	zebrafish_LD_Adult
0.154667	0.0837873	0.158008	0.151233	retina	mouse_LD_P60	zebrafish_LD_36hr
0.0823872	0.0894356	0.111586	0.0785018	retina	mouse_LD_P60	zebrafish_LD_20hr
0.0963037	0.0537453	0.0985457	0.0848431	retina	mouse_LD_P60	zebrafish_LD_10hr
0.209638	0.265075	0.248345	0.19312	retina	mouse_LD_P60	zebrafish_LD_4hr
0.13562	0.267764	0.249423	0.139387	retina	mouse_LD_24hr	zebrafish_TNFa_Adult
0.150261	0.168813	0.20401	0.15045	retina	mouse_LD_24hr	zebrafish_TNFa_72hr
0.110868	0.0878891	0.129367	0.150309	retina	mouse_LD_24hr	zebrafish_TNFa_36hr
0.160344	0.204546	0.230633	0.162442	retina	mouse_LD_24hr	zebrafish_TNFa_20hr
0.13193	0.184108	0.182721	0.15422	retina	mouse_LD_24hr	zebrafish_TNFa_10hr
0.152731	0.292829	0.298229	0.165268	retina	mouse_LD_24hr	zebrafish_NMDA_Adult
0.238722	0.199241	0.231284	0.233503	retina	mouse_LD_24hr	zebrafish_NMDA_36hr
0.186764	0.165734	0.204432	0.245334	retina	mouse_LD_24hr	zebrafish_NMDA_20hr
0.170358	0.337656	0.288344	0.166747	retina	mouse_LD_24hr	zebrafish_NMDA_10hr
0.164376	0.293003	0.271152	0.166458	retina	mouse_LD_24hr	zebrafish_NMDA_4hr
0.134046	0.253502	0.223762	0.157103	retina	mouse_LD_24hr	zebrafish_LD_Adult
0.116478	0.0678135	0.107532	0.137119	retina	mouse_LD_24hr	zebrafish_LD_36hr
0.0979199	0.128678	0.12839	0.0896941	retina	mouse_LD_24hr	zebrafish_LD_20hr
0.0876489	0.0874877	0.100459	0.12756	retina	mouse_LD_24hr	zebrafish_LD_10hr
0.147458	0.187891	0.190791	0.17432	retina	mouse_LD_24hr	zebrafish_LD_4hr
0.195133	0.232944	0.226841	0.147897	retina	mouse_LD_10hr	zebrafish_TNFa_Adult
0.164348	0.178678	0.186231	0.119809	retina	mouse_LD_10hr	zebrafish_TNFa_72hr
0.147313	0.0776662	0.135428	0.0946083	retina	mouse_LD_10hr	zebrafish_TNFa_36hr
0.175516	0.168794	0.203696	0.111837	retina	mouse_LD_10hr	zebrafish_TNFa_20hr
0.187806	0.111107	0.161327	0.129145	retina	mouse_LD_10hr	zebrafish_TNFa_10hr
0.183639	0.248148	0.225507	0.116011	retina	mouse_LD_10hr	zebrafish_NMDA_Adult
0.216496	0.161627	0.223104	0.167394	retina	mouse_LD_10hr	zebrafish_NMDA_36hr
0.228472	0.172172	0.213122	0.187919	retina	mouse_LD_10hr	zebrafish_NMDA_20hr
0.179605	0.202089	0.225513	0.146859	retina	mouse_LD_10hr	zebrafish_NMDA_10hr
0.192914	0.230392	0.240964	0.119613	retina	mouse_LD_10hr	zebrafish_NMDA_4hr
0.212301	0.202483	0.226482	0.146687	retina	mouse_LD_10hr	zebrafish_LD_Adult
0.149357	0.0653778	0.0998723	0.0977639	retina	mouse_LD_10hr	zebrafish_LD_36hr
0.127912	0.0616362	0.104511	0.0872639	retina	mouse_LD_10hr	zebrafish_LD_20hr
0.106614	0.0487508	0.0977803	0.0923864	retina	mouse_LD_10hr	zebrafish_LD_10hr
0.143303	0.125301	0.137554	0.116863	retina	mouse_LD_10hr	zebrafish_LD_4hr
0.161053	0.254775	0.239415	0.149279	retina	mouse_LD_4hr	zebrafish_TNFa_Adult
0.160367	0.145177	0.193796	0.147666	retina	mouse_LD_4hr	zebrafish_TNFa_72hr
0.166552	0.0823258	0.132557	0.122034	retina	mouse_LD_4hr	zebrafish_TNFa_36hr
0.130895	0.221357	0.197601	0.123295	retina	mouse_LD_4hr	zebrafish_TNFa_20hr
0.147832	0.180883	0.18313	0.115791	retina	mouse_LD_4hr	zebrafish_TNFa_10hr
0.099803	0.113851	0.123685	0.0819219	retina	mouse_LD_4hr	zebrafish_NMDA_Adult
0.186582	0.150351	0.202033	0.218944	retina	mouse_LD_4hr	zebrafish_NMDA_36hr
0.190586	0.180098	0.208125	0.223898	retina	mouse_LD_4hr	zebrafish_NMDA_20hr
0.148485	0.176541	0.185741	0.144165	retina	mouse_LD_4hr	zebrafish_NMDA_10hr
0.200916	0.296178	0.270204	0.203864	retina	mouse_LD_4hr	zebrafish_NMDA_4hr
0.173389	0.264489	0.228329	0.126894	retina	mouse_LD_4hr	zebrafish_LD_Adult
0.082605	0.0213894	0.0495925	0.0810962	retina	mouse_LD_4hr	zebrafish_LD_36hr
0.104432	0.0280828	0.0779776	0.0784142	retina	mouse_LD_4hr	zebrafish_LD_20hr
0.0738387	0.0553416	0.0929966	0.0828021	retina	mouse_LD_4hr	zebrafish_LD_10hr
0.189497	0.187935	0.202878	0.191222	retina	mouse_LD_4hr	zebrafish_LD_4hr
0.19831	0.259438	0.260559	0.161663	retina	mouse_LD_0hr	zebrafish_TNFa_Adult
0.148645	0.120334	0.168831	0.15883	retina	mouse_LD_0hr	zebrafish_TNFa_72hr
0.174768	0.108592	0.15792	0.151138	retina	mouse_LD_0hr	zebrafish_TNFa_36hr
0.134313	0.122985	0.147267	0.117586	retina	mouse_LD_0hr	zebrafish_TNFa_20hr
0.193334	0.264749	0.237384	0.204182	retina	mouse_LD_0hr	zebrafish_TNFa_10hr
0.182764	0.269907	0.239774	0.173704	retina	mouse_LD_0hr	zebrafish_NMDA_Adult
0.26946	0.225224	0.260783	0.294781	retina	mouse_LD_0hr	zebrafish_NMDA_36hr
0.279158	0.261197	0.274604	0.312802	retina	mouse_LD_0hr	zebrafish_NMDA_20hr
0.175055	0.189267	0.208166	0.164117	retina	mouse_LD_0hr	zebrafish_NMDA_10hr
0.190938	0.282522	0.246108	0.199727	retina	mouse_LD_0hr	zebrafish_NMDA_4hr
0.18613	0.19379	0.200616	0.161555	retina	mouse_LD_0hr	zebrafish_LD_Adult
0.159473	0.074506	0.114014	0.142774	retina	mouse_LD_0hr	zebrafish_LD_36hr
0.124215	0.0830776	0.0964033	0.0833278	retina	mouse_LD_0hr	zebrafish_LD_20hr
0.140221	0.0823862	0.112706	0.156517	retina	mouse_LD_0hr	zebrafish_LD_10hr
0.198787	0.129864	0.186475	0.20427	retina	mouse_LD_0hr	zebrafish_LD_4hr
0.13882	0.158881	0.228381	0.148957	retina	mouse_NMDA_P60	zebrafish_TNFa_Adult
0.132377	0.162043	0.216618	0.137693	retina	mouse_NMDA_P60	zebrafish_TNFa_72hr
0.130513	0.145416	0.179135	0.118663	retina	mouse_NMDA_P60	zebrafish_TNFa_36hr
0.154662	0.221786	0.25698	0.168537	retina	mouse_NMDA_P60	zebrafish_TNFa_20hr
0.151169	0.195869	0.221005	0.151026	retina	mouse_NMDA_P60	zebrafish_TNFa_10hr
0.176082	0.211272	0.242956	0.141872	retina	mouse_NMDA_P60	zebrafish_NMDA_Adult
0.167266	0.111898	0.153446	0.162041	retina	mouse_NMDA_P60	zebrafish_NMDA_36hr
0.175843	0.121994	0.203346	0.188141	retina	mouse_NMDA_P60	zebrafish_NMDA_20hr
0.130735	0.214418	0.192511	0.134744	retina	mouse_NMDA_P60	zebrafish_NMDA_10hr
0.184928	0.241805	0.261134	0.173688	retina	mouse_NMDA_P60	zebrafish_NMDA_4hr
0.207748	0.291813	0.313164	0.189794	retina	mouse_NMDA_P60	zebrafish_LD_Adult
0.123991	0.0316673	0.0779731	0.0819564	retina	mouse_NMDA_P60	zebrafish_LD_36hr
0.104635	0.114896	0.14092	0.0826226	retina	mouse_NMDA_P60	zebrafish_LD_20hr
0.102765	0.0625921	0.0987371	0.111234	retina	mouse_NMDA_P60	zebrafish_LD_10hr
0.127301	0.111978	0.165468	0.165902	retina	mouse_NMDA_P60	zebrafish_LD_4hr
0.0927099	0.16787	0.209854	0.092466	retina	mouse_NMDA_72hr	zebrafish_TNFa_Adult
0.118627	0.127328	0.232379	0.130235	retina	mouse_NMDA_72hr	zebrafish_TNFa_72hr
0.0901153	0.162646	0.199075	0.100861	retina	mouse_NMDA_72hr	zebrafish_TNFa_36hr
0.117782	0.317892	0.283327	0.164086	retina	mouse_NMDA_72hr	zebrafish_TNFa_20hr
0.097045	0.225751	0.229706	0.130665	retina	mouse_NMDA_72hr	zebrafish_TNFa_10hr
0.120016	0.198103	0.264973	0.108203	retina	mouse_NMDA_72hr	zebrafish_NMDA_Adult
0.127494	0.138014	0.203272	0.17593	retina	mouse_NMDA_72hr	zebrafish_NMDA_36hr
0.137806	0.148659	0.252444	0.143601	retina	mouse_NMDA_72hr	zebrafish_NMDA_20hr
0.141995	0.296869	0.290882	0.137222	retina	mouse_NMDA_72hr	zebrafish_NMDA_10hr
0.137484	0.324887	0.319616	0.151861	retina	mouse_NMDA_72hr	zebrafish_NMDA_4hr
0.0758886	0.0946157	0.167308	0.0861065	retina	mouse_NMDA_72hr	zebrafish_LD_Adult
0.0445357	0.0561246	0.0904449	0.0654476	retina	mouse_NMDA_72hr	zebrafish_LD_36hr
0.067465	0.0428604	0.161851	0.043189	retina	mouse_NMDA_72hr	zebrafish_LD_20hr
0.101815	0.104599	0.20685	0.11779	retina	mouse_NMDA_72hr	zebrafish_LD_10hr
0.106003	0.171334	0.191942	0.124705	retina	mouse_NMDA_72hr	zebrafish_LD_4hr
0.169925	0.369327	0.368591	0.203582	retina	mouse_NMDA_48hr	zebrafish_TNFa_Adult
0.193663	0.191021	0.256084	0.186185	retina	mouse_NMDA_48hr	zebrafish_TNFa_72hr
0.28796	0.391183	0.441059	0.252945	retina	mouse_NMDA_48hr	zebrafish_TNFa_36hr
0.237649	0.307555	0.376327	0.25587	retina	mouse_NMDA_48hr	zebrafish_TNFa_20hr
0.18298	0.261103	0.27055	0.195547	retina	mouse_NMDA_48hr	zebrafish_TNFa_10hr
0.181144	0.306556	0.295612	0.165816	retina	mouse_NMDA_48hr	zebrafish_NMDA_Adult
0.157317	0.141911	0.180218	0.147259	retina	mouse_NMDA_48hr	zebrafish_NMDA_36hr
0.211246	0.256375	0.322398	0.233069	retina	mouse_NMDA_48hr	zebrafish_NMDA_20hr
0.214049	0.331072	0.309499	0.189817	retina	mouse_NMDA_48hr	zebrafish_NMDA_10hr
0.193371	0.325998	0.339245	0.221498	retina	mouse_NMDA_48hr	zebrafish_NMDA_4hr
0.169992	0.322168	0.342571	0.198278	retina	mouse_NMDA_48hr	zebrafish_LD_Adult
0.0988545	0.0286777	0.0601984	0.0707785	retina	mouse_NMDA_48hr	zebrafish_LD_36hr
0.102083	0.0891325	0.14033	0.117684	retina	mouse_NMDA_48hr	zebrafish_LD_20hr
0.117941	0.104168	0.12744	0.104376	retina	mouse_NMDA_48hr	zebrafish_LD_10hr
0.159174	0.162374	0.210647	0.197861	retina	mouse_NMDA_48hr	zebrafish_LD_4hr
0.109186	0.236619	0.270105	0.147402	retina	mouse_NMDA_36hr	zebrafish_TNFa_Adult
0.0486313	0.0447617	0.15244	0.0707402	retina	mouse_NMDA_36hr	zebrafish_TNFa_72hr
0.0771029	0.0655174	0.212315	0.0920311	retina	mouse_NMDA_36hr	zebrafish_TNFa_36hr
0.0966068	0.148146	0.285293	0.0991661	retina	mouse_NMDA_36hr	zebrafish_TNFa_20hr
0.0918074	0.173361	0.23462	0.114856	retina	mouse_NMDA_36hr	zebrafish_TNFa_10hr
0.0877806	0.169086	0.22525	0.095178	retina	mouse_NMDA_36hr	zebrafish_NMDA_Adult
0.118945	0.0623077	0.213436	0.118452	retina	mouse_NMDA_36hr	zebrafish_NMDA_36hr
0.105971	0.0796125	0.225071	0.119799	retina	mouse_NMDA_36hr	zebrafish_NMDA_20hr
0.117818	0.209	0.294267	0.182775	retina	mouse_NMDA_36hr	zebrafish_NMDA_10hr
0.145285	0.175351	0.326384	0.109973	retina	mouse_NMDA_36hr	zebrafish_NMDA_4hr
0.108848	0.18506	0.311727	0.125878	retina	mouse_NMDA_36hr	zebrafish_LD_Adult
0.044485	0.0184635	0.119317	0.0490343	retina	mouse_NMDA_36hr	zebrafish_LD_36hr
0.0465416	0.0323191	0.209758	0.0442022	retina	mouse_NMDA_36hr	zebrafish_LD_20hr
0.0573305	0.04491	0.273823	0.0867301	retina	mouse_NMDA_36hr	zebrafish_LD_10hr
0.103487	0.112393	0.326906	0.106077	retina	mouse_NMDA_36hr	zebrafish_LD_4hr
0.14343	0.233507	0.233718	0.105677	retina	mouse_NMDA_24hr	zebrafish_TNFa_Adult
0.148813	0.124142	0.163157	0.131615	retina	mouse_NMDA_24hr	zebrafish_TNFa_72hr
0.125384	0.111219	0.157122	0.105822	retina	mouse_NMDA_24hr	zebrafish_TNFa_36hr
0.154722	0.224241	0.2442	0.152427	retina	mouse_NMDA_24hr	zebrafish_TNFa_20hr
0.127218	0.11378	0.154161	0.152626	retina	mouse_NMDA_24hr	zebrafish_TNFa_10hr
0.159621	0.256176	0.248294	0.139477	retina	mouse_NMDA_24hr	zebrafish_NMDA_Adult
0.1545	0.0932845	0.158156	0.104849	retina	mouse_NMDA_24hr	zebrafish_NMDA_36hr
0.214827	0.157281	0.23615	0.168966	retina	mouse_NMDA_24hr	zebrafish_NMDA_20hr
0.17458	0.331119	0.307383	0.150036	retina	mouse_NMDA_24hr	zebrafish_NMDA_10hr
0.140551	0.248259	0.223501	0.119977	retina	mouse_NMDA_24hr	zebrafish_NMDA_4hr
0.197173	0.327751	0.334308	0.151579	retina	mouse_NMDA_24hr	zebrafish_LD_Adult
0.125994	0.188481	0.254444	0.0878297	retina	mouse_NMDA_24hr	zebrafish_LD_36hr
0.0839954	0.0628931	0.0832842	0.0731003	retina	mouse_NMDA_24hr	zebrafish_LD_20hr
0.0867765	0.0716872	0.115959	0.105273	retina	mouse_NMDA_24hr	zebrafish_LD_10hr
0.173206	0.099071	0.151942	0.120939	retina	mouse_NMDA_24hr	zebrafish_LD_4hr
0.136082	0.221956	0.221093	0.147689	retina	mouse_NMDA_12hr	zebrafish_TNFa_Adult
0.15971	0.188472	0.242214	0.190535	retina	mouse_NMDA_12hr	zebrafish_TNFa_72hr
0.167707	0.28858	0.266709	0.202209	retina	mouse_NMDA_12hr	zebrafish_TNFa_36hr
0.188004	0.187669	0.234762	0.186849	retina	mouse_NMDA_12hr	zebrafish_TNFa_20hr
0.14888	0.231288	0.212099	0.153433	retina	mouse_NMDA_12hr	zebrafish_TNFa_10hr
0.171326	0.263719	0.24932	0.165674	retina	mouse_NMDA_12hr	zebrafish_NMDA_Adult
0.212343	0.213158	0.258304	0.260678	retina	mouse_NMDA_12hr	zebrafish_NMDA_36hr
0.262983	0.309507	0.382794	0.282211	retina	mouse_NMDA_12hr	zebrafish_NMDA_20hr
0.197933	0.199157	0.220859	0.205727	retina	mouse_NMDA_12hr	zebrafish_NMDA_10hr
0.250091	0.431259	0.425206	0.243318	retina	mouse_NMDA_12hr	zebrafish_NMDA_4hr
0.164337	0.223086	0.235053	0.149982	retina	mouse_NMDA_12hr	zebrafish_LD_Adult
0.128473	0.139066	0.17598	0.173666	retina	mouse_NMDA_12hr	zebrafish_LD_36hr
0.0451506	0.016975	0.0487913	0.0344936	retina	mouse_NMDA_12hr	zebrafish_LD_20hr
0.116179	0.0722481	0.117681	0.112783	retina	mouse_NMDA_12hr	zebrafish_LD_10hr
0.207715	0.327888	0.349928	0.253594	retina	mouse_NMDA_12hr	zebrafish_LD_4hr
0.210859	0.224738	0.248242	0.17751	retina	mouse_NMDA_6hr	zebrafish_TNFa_Adult
0.225652	0.178138	0.247384	0.179858	retina	mouse_NMDA_6hr	zebrafish_TNFa_72hr
0.138653	0.108152	0.159196	0.113542	retina	mouse_NMDA_6hr	zebrafish_TNFa_36hr
0.162149	0.117651	0.189343	0.155872	retina	mouse_NMDA_6hr	zebrafish_TNFa_20hr
0.208855	0.221816	0.270652	0.204962	retina	mouse_NMDA_6hr	zebrafish_TNFa_10hr
0.173442	0.240888	0.239723	0.143425	retina	mouse_NMDA_6hr	zebrafish_NMDA_Adult
0.18434	0.110893	0.171294	0.178136	retina	mouse_NMDA_6hr	zebrafish_NMDA_36hr
0.166164	0.086629	0.152075	0.150625	retina	mouse_NMDA_6hr	zebrafish_NMDA_20hr
0.214743	0.202529	0.264438	0.224678	retina	mouse_NMDA_6hr	zebrafish_NMDA_10hr
0.225037	0.223286	0.258427	0.200701	retina	mouse_NMDA_6hr	zebrafish_NMDA_4hr
0.16246	0.210046	0.212471	0.147783	retina	mouse_NMDA_6hr	zebrafish_LD_Adult
0.120235	0.0319781	0.0606894	0.0752823	retina	mouse_NMDA_6hr	zebrafish_LD_36hr
0.0872329	0.0506658	0.0675118	0.0641996	retina	mouse_NMDA_6hr	zebrafish_LD_20hr
0.0872809	0.0775129	0.109261	0.118113	retina	mouse_NMDA_6hr	zebrafish_LD_10hr
0.245784	0.296598	0.336403	0.25141	retina	mouse_NMDA_6hr	zebrafish_LD_4hr
0.161152	0.202848	0.221452	0.133549	retina	mouse_NMDA_3hr	zebrafish_TNFa_Adult
0.116446	0.0441791	0.106922	0.100478	retina	mouse_NMDA_3hr	zebrafish_TNFa_72hr
0.175247	0.0851691	0.160472	0.131994	retina	mouse_NMDA_3hr	zebrafish_TNFa_36hr
0.193182	0.219524	0.279198	0.184211	retina	mouse_NMDA_3hr	zebrafish_TNFa_20hr
0.200315	0.220778	0.275361	0.199486	retina	mouse_NMDA_3hr	zebrafish_TNFa_10hr
0.202685	0.286906	0.314909	0.175945	retina	mouse_NMDA_3hr	zebrafish_NMDA_Adult
0.240845	0.208464	0.302677	0.258212	retina	mouse_NMDA_3hr	zebrafish_NMDA_36hr
0.223397	0.222966	0.325657	0.236888	retina	mouse_NMDA_3hr	zebrafish_NMDA_20hr
0.223937	0.279861	0.325576	0.231378	retina	mouse_NMDA_3hr	zebrafish_NMDA_10hr
0.263446	0.351254	0.379721	0.282716	retina	mouse_NMDA_3hr	zebrafish_NMDA_4hr
0.174955	0.163581	0.222889	0.145765	retina	mouse_NMDA_3hr	zebrafish_LD_Adult
0.0739064	0.0476463	0.0925071	0.0934321	retina	mouse_NMDA_3hr	zebrafish_LD_36hr
0.139548	0.11116	0.161999	0.133464	retina	mouse_NMDA_3hr	zebrafish_LD_20hr
0.10581	0.149519	0.199962	0.122035	retina	mouse_NMDA_3hr	zebrafish_LD_10hr
0.209956	0.303254	0.347626	0.235504	retina	mouse_NMDA_3hr	zebrafish_LD_4hr
0.18102	0.325607	0.323736	0.180585	retina	Macosko	zebrafish_TNFa_Adult
0.194138	0.21643	0.293658	0.185486	retina	Macosko	zebrafish_TNFa_72hr
0.159779	0.152226	0.223162	0.163198	retina	Macosko	zebrafish_TNFa_36hr
0.216868	0.335942	0.360401	0.199594	retina	Macosko	zebrafish_TNFa_20hr
0.1538	0.160452	0.175351	0.199345	retina	Macosko	zebrafish_TNFa_10hr
0.161407	0.337567	0.279548	0.181712	retina	Macosko	zebrafish_NMDA_Adult
0.211839	0.285073	0.303421	0.251518	retina	Macosko	zebrafish_NMDA_36hr
0.232051	0.275699	0.31197	0.287834	retina	Macosko	zebrafish_NMDA_20hr
0.165325	0.264861	0.251745	0.172496	retina	Macosko	zebrafish_NMDA_10hr
0.192145	0.336059	0.311899	0.205157	retina	Macosko	zebrafish_NMDA_4hr
0.143502	0.301657	0.25707	0.150855	retina	Macosko	zebrafish_LD_Adult
0.173745	0.204907	0.295296	0.186386	retina	Macosko	zebrafish_LD_36hr
0.154828	0.0719641	0.152417	0.121336	retina	Macosko	zebrafish_LD_20hr
0.146183	0.192545	0.207042	0.144216	retina	Macosko	zebrafish_LD_10hr
0.130906	0.154222	0.159137	0.12865	retina	Macosko	zebrafish_LD_4hr
0.223721	0.441758	0.513912	0.279935	retina	chick_P10	Menon_microfluidics
0.360629	0.706874	0.775862	0.49518	retina	chick_P10	Menon_seqwell
0.281427	0.615245	0.637323	0.3543	retina	chick_P10	mouse_LD_P60
0.303613	0.38405	0.445542	0.349847	retina	chick_P10	mouse_LD_24hr
0.280143	0.404385	0.465547	0.357792	retina	chick_P10	mouse_LD_10hr
0.237679	0.399874	0.405301	0.333625	retina	chick_P10	mouse_LD_4hr
0.309824	0.534986	0.545287	0.372068	retina	chick_P10	mouse_LD_0hr
0.212072	0.470656	0.444767	0.291158	retina	chick_P10	mouse_NMDA_P60
0.291567	0.52281	0.591663	0.355791	retina	chick_P10	mouse_NMDA_72hr
0.279501	0.478072	0.588553	0.372522	retina	chick_P10	mouse_NMDA_48hr
0.208931	0.359918	0.434838	0.314553	retina	chick_P10	mouse_NMDA_36hr
0.273736	0.562011	0.58226	0.395924	retina	chick_P10	mouse_NMDA_24hr
0.243567	0.550717	0.585089	0.422511	retina	chick_P10	mouse_NMDA_12hr
0.233867	0.409161	0.417446	0.308838	retina	chick_P10	mouse_NMDA_6hr
0.216075	0.356733	0.375705	0.347099	retina	chick_P10	mouse_NMDA_3hr
0.281244	0.7258	0.75915	0.330234	retina	chick_P10	Macosko
0.0944126	0.273895	0.25281	0.15385	retina	chick_P10	zebrafish_TNFa_Adult
0.0390402	0.1897	0.133148	0.0387814	retina	chick_P10	zebrafish_TNFa_72hr
0.0480369	0.197	0.14468	0.0523997	retina	chick_P10	zebrafish_TNFa_36hr
0.109044	0.29324	0.276445	0.122258	retina	chick_P10	zebrafish_TNFa_20hr
0.0864391	0.216376	0.21384	0.0894546	retina	chick_P10	zebrafish_TNFa_10hr
0.122297	0.32557	0.328253	0.16186	retina	chick_P10	zebrafish_NMDA_Adult
0.140535	0.260934	0.309866	0.202985	retina	chick_P10	zebrafish_NMDA_36hr
0.0983458	0.237989	0.219857	0.109276	retina	chick_P10	zebrafish_NMDA_20hr
0.115518	0.313169	0.322403	0.142325	retina	chick_P10	zebrafish_NMDA_10hr
0.107612	0.353479	0.304725	0.111413	retina	chick_P10	zebrafish_NMDA_4hr
0.0946109	0.314292	0.307005	0.138115	retina	chick_P10	zebrafish_LD_Adult
0.0797296	0.190963	0.206913	0.171849	retina	chick_P10	zebrafish_LD_36hr
0.057512	0.277975	0.204746	0.031118	retina	chick_P10	zebrafish_LD_20hr
0.0653229	0.221947	0.230004	0.054708	retina	chick_P10	zebrafish_LD_10hr
0.0894197	0.250219	0.300719	0.107537	retina	chick_P10	zebrafish_LD_4hr
0.0701725	0.0364009	0.0675925	0.107811	retina	zebrafish_TNFa_Adult	Menon_microfluidics
0.194084	0.362038	0.340517	0.258738	retina	zebrafish_TNFa_Adult	Menon_seqwell
0.114896	0.103744	0.112438	0.153116	retina	zebrafish_TNFa_72hr	Menon_microfluidics
0.206457	0.215377	0.283251	0.256305	retina	zebrafish_TNFa_72hr	Menon_seqwell
0.141309	0.206618	0.202877	0.158346	retina	zebrafish_TNFa_36hr	Menon_microfluidics
0.220238	0.25427	0.306342	0.283829	retina	zebrafish_TNFa_36hr	Menon_seqwell
0.144649	0.16031	0.150217	0.130415	retina	zebrafish_TNFa_20hr	Menon_microfluidics
0.288292	0.323844	0.397475	0.303052	retina	zebrafish_TNFa_20hr	Menon_seqwell
0.180881	0.136696	0.128416	0.217001	retina	zebrafish_TNFa_10hr	Menon_microfluidics
0.218361	0.405795	0.414717	0.232152	retina	zebrafish_TNFa_10hr	Menon_seqwell
0.100162	0.0351212	0.0720721	0.118669	retina	zebrafish_NMDA_Adult	Menon_microfluidics
0.225107	0.324815	0.34883	0.299497	retina	zebrafish_NMDA_Adult	Menon_seqwell
0.214498	0.351963	0.387437	0.230667	retina	zebrafish_NMDA_36hr	Menon_microfluidics
0.256471	0.476604	0.474138	0.354988	retina	zebrafish_NMDA_36hr	Menon_seqwell
0.145484	0.14391	0.18471	0.254072	retina	zebrafish_NMDA_20hr	Menon_microfluidics
0.251436	0.380654	0.44766	0.333301	retina	zebrafish_NMDA_20hr	Menon_seqwell
0.107067	0.0371967	0.0739137	0.225751	retina	zebrafish_NMDA_10hr	Menon_microfluidics
0.256647	0.276328	0.374076	0.327554	retina	zebrafish_NMDA_10hr	Menon_seqwell
0.112086	0.0475075	0.0741626	0.155036	retina	zebrafish_NMDA_4hr	Menon_microfluidics
0.16006	0.10531	0.158867	0.28273	retina	zebrafish_NMDA_4hr	Menon_seqwell
0.137611	0.0759702	0.135583	0.202317	retina	zebrafish_LD_Adult	Menon_microfluidics
0.265993	0.472958	0.499692	0.347349	retina	zebrafish_LD_Adult	Menon_seqwell
0.131456	0.0530824	0.103579	0.148591	retina	zebrafish_LD_36hr	Menon_microfluidics
0.22018	0.221525	0.284483	0.287072	retina	zebrafish_LD_36hr	Menon_seqwell
0.155773	0.3561	0.370216	0.187802	retina	zebrafish_LD_20hr	Menon_microfluidics
0.183025	0.332581	0.319273	0.219985	retina	zebrafish_LD_20hr	Menon_seqwell
0.127648	0.218592	0.259171	0.102952	retina	zebrafish_LD_10hr	Menon_microfluidics
0.25282	0.48317	0.491071	0.350965	retina	zebrafish_LD_10hr	Menon_seqwell
0.162511	0.527848	0.461052	0.231649	retina	zebrafish_LD_4hr	Menon_microfluidics
0.212539	0.342785	0.381466	0.333582	retina	zebrafish_LD_4hr	Menon_seqwell
0.210146	0.099786	0.133128	0.143192	retina	zebrafish_TNFa_Adult	mouse_LD_P60
0.300401	0.328831	0.308452	0.195421	retina	zebrafish_TNFa_Adult	mouse_LD_24hr
0.230576	0.100662	0.158845	0.156604	retina	zebrafish_TNFa_Adult	mouse_LD_10hr
0.187636	0.0979762	0.107304	0.197785	retina	zebrafish_TNFa_Adult	mouse_LD_4hr
0.213212	0.139765	0.155056	0.176198	retina	zebrafish_TNFa_Adult	mouse_LD_0hr
0.165647	0.172333	0.169981	0.209458	retina	zebrafish_TNFa_Adult	mouse_NMDA_P60
0.150734	0.0954597	0.123504	0.185826	retina	zebrafish_TNFa_Adult	mouse_NMDA_72hr
0.225941	0.324986	0.282906	0.28187	retina	zebrafish_TNFa_Adult	mouse_NMDA_48hr
0.1508	0.0701653	0.0807374	0.282854	retina	zebrafish_TNFa_Adult	mouse_NMDA_36hr
0.224371	0.0780906	0.11731	0.149426	retina	zebrafish_TNFa_Adult	mouse_NMDA_24hr
0.13841	0.136728	0.137278	0.26334	retina	zebrafish_TNFa_Adult	mouse_NMDA_12hr
0.0577515	0.0153233	0.0103193	0.10107	retina	zebrafish_TNFa_Adult	mouse_NMDA_6hr
0.200872	0.127758	0.160172	0.204878	retina	zebrafish_TNFa_Adult	mouse_NMDA_3hr
0.241492	0.216842	0.32367	0.209347	retina	zebrafish_TNFa_Adult	Macosko
0.272169	0.246605	0.275826	0.233434	retina	zebrafish_TNFa_72hr	mouse_LD_P60
0.316418	0.352505	0.385198	0.22477	retina	zebrafish_TNFa_72hr	mouse_LD_24hr
0.293949	0.256307	0.297755	0.25707	retina	zebrafish_TNFa_72hr	mouse_LD_10hr
0.286909	0.261038	0.306399	0.196909	retina	zebrafish_TNFa_72hr	mouse_LD_4hr
0.321974	0.284616	0.338663	0.237319	retina	zebrafish_TNFa_72hr	mouse_LD_0hr
0.266188	0.293162	0.329801	0.277796	retina	zebrafish_TNFa_72hr	mouse_NMDA_P60
0.354376	0.352547	0.411424	0.263421	retina	zebrafish_TNFa_72hr	mouse_NMDA_72hr
0.292162	0.26402	0.343419	0.306495	retina	zebrafish_TNFa_72hr	mouse_NMDA_48hr
0.248313	0.391681	0.446281	0.343846	retina	zebrafish_TNFa_72hr	mouse_NMDA_36hr
0.304148	0.277161	0.294468	0.247534	retina	zebrafish_TNFa_72hr	mouse_NMDA_24hr
0.236186	0.131655	0.185562	0.199743	retina	zebrafish_TNFa_72hr	mouse_NMDA_12hr
0.297224	0.260003	0.278942	0.305436	retina	zebrafish_TNFa_72hr	mouse_NMDA_6hr
0.320168	0.269563	0.322494	0.242746	retina	zebrafish_TNFa_72hr	mouse_NMDA_3hr
0.138859	0.0375685	0.0566863	0.131881	retina	zebrafish_TNFa_72hr	Macosko
0.232665	0.237969	0.259177	0.199816	retina	zebrafish_TNFa_36hr	mouse_LD_P60
0.289945	0.245592	0.246005	0.206529	retina	zebrafish_TNFa_36hr	mouse_LD_24hr
0.232835	0.169772	0.194475	0.177002	retina	zebrafish_TNFa_36hr	mouse_LD_10hr
0.214312	0.114002	0.105042	0.173048	retina	zebrafish_TNFa_36hr	mouse_LD_4hr
0.302706	0.360969	0.382237	0.227522	retina	zebrafish_TNFa_36hr	mouse_LD_0hr
0.223179	0.206756	0.221222	0.24364	retina	zebrafish_TNFa_36hr	mouse_NMDA_P60
0.336636	0.421057	0.443072	0.278739	retina	zebrafish_TNFa_36hr	mouse_NMDA_72hr
0.316409	0.295204	0.374253	0.364072	retina	zebrafish_TNFa_36hr	mouse_NMDA_48hr
0.233767	0.124548	0.172282	0.254753	retina	zebrafish_TNFa_36hr	mouse_NMDA_36hr
0.281946	0.145903	0.204101	0.213772	retina	zebrafish_TNFa_36hr	mouse_NMDA_24hr
0.206621	0.161602	0.153373	0.302087	retina	zebrafish_TNFa_36hr	mouse_NMDA_12hr
0.22049	0.241886	0.241696	0.237156	retina	zebrafish_TNFa_36hr	mouse_NMDA_6hr
0.282647	0.235309	0.254905	0.2341	retina	zebrafish_TNFa_36hr	mouse_NMDA_3hr
0.119839	0.0151313	0.0250402	0.0997587	retina	zebrafish_TNFa_36hr	Macosko
0.281658	0.32657	0.353304	0.193806	retina	zebrafish_TNFa_20hr	mouse_LD_P60
0.325572	0.35094	0.386669	0.243874	retina	zebrafish_TNFa_20hr	mouse_LD_24hr
0.234639	0.290752	0.342019	0.218404	retina	zebrafish_TNFa_20hr	mouse_LD_10hr
0.211004	0.159116	0.205882	0.217857	retina	zebrafish_TNFa_20hr	mouse_LD_4hr
0.300862	0.40743	0.441536	0.259753	retina	zebrafish_TNFa_20hr	mouse_LD_0hr
0.235876	0.372135	0.398316	0.260205	retina	zebrafish_TNFa_20hr	mouse_NMDA_P60
0.330882	0.544809	0.557314	0.296746	retina	zebrafish_TNFa_20hr	mouse_NMDA_72hr
0.320267	0.553328	0.609751	0.428532	retina	zebrafish_TNFa_20hr	mouse_NMDA_48hr
0.27014	0.331877	0.431024	0.287429	retina	zebrafish_TNFa_20hr	mouse_NMDA_36hr
0.238044	0.260904	0.280162	0.240455	retina	zebrafish_TNFa_20hr	mouse_NMDA_24hr
0.0660498	0.00263965	0.0106509	0.0690229	retina	zebrafish_TNFa_20hr	mouse_NMDA_12hr
0.244041	0.397556	0.354241	0.301929	retina	zebrafish_TNFa_20hr	mouse_NMDA_6hr
0.317045	0.431057	0.468826	0.279297	retina	zebrafish_TNFa_20hr	mouse_NMDA_3hr
0.143359	0.00840423	0.024393	0.0691112	retina	zebrafish_TNFa_20hr	Macosko
0.31729	0.402634	0.400302	0.217615	retina	zebrafish_TNFa_10hr	mouse_LD_P60
0.2829	0.244113	0.275652	0.233243	retina	zebrafish_TNFa_10hr	mouse_LD_24hr
0.240965	0.16226	0.173442	0.264342	retina	zebrafish_TNFa_10hr	mouse_LD_10hr
0.288102	0.275413	0.319328	0.260255	retina	zebrafish_TNFa_10hr	mouse_LD_4hr
0.370809	0.472814	0.490205	0.270507	retina	zebrafish_TNFa_10hr	mouse_LD_0hr
0.269944	0.337899	0.361446	0.245232	retina	zebrafish_TNFa_10hr	mouse_NMDA_P60
0.270995	0.205174	0.255114	0.292456	retina	zebrafish_TNFa_10hr	mouse_NMDA_72hr
0.337341	0.426592	0.453267	0.434403	retina	zebrafish_TNFa_10hr	mouse_NMDA_48hr
0.263339	0.241388	0.331214	0.378829	retina	zebrafish_TNFa_10hr	mouse_NMDA_36hr
0.331712	0.457257	0.47258	0.277894	retina	zebrafish_TNFa_10hr	mouse_NMDA_24hr
0.192047	0.19286	0.168284	0.32246	retina	zebrafish_TNFa_10hr	mouse_NMDA_12hr
0.278707	0.36926	0.315866	0.332997	retina	zebrafish_TNFa_10hr	mouse_NMDA_6hr
0.269908	0.188291	0.23448	0.271959	retina	zebrafish_TNFa_10hr	mouse_NMDA_3hr
0.137133	0.0535894	0.0744064	0.124879	retina	zebrafish_TNFa_10hr	Macosko
0.224346	0.278983	0.282774	0.22088	retina	zebrafish_NMDA_Adult	mouse_LD_P60
0.226951	0.0843259	0.101766	0.18581	retina	zebrafish_NMDA_Adult	mouse_LD_24hr
0.195685	0.108089	0.118506	0.219972	retina	zebrafish_NMDA_Adult	mouse_LD_10hr
0.221466	0.34557	0.310278	0.315619	retina	zebrafish_NMDA_Adult	mouse_LD_4hr
0.220359	0.258953	0.233243	0.233062	retina	zebrafish_NMDA_Adult	mouse_LD_0hr
0.164488	0.215363	0.227319	0.234478	retina	zebrafish_NMDA_Adult	mouse_NMDA_P60
0.157747	0.154318	0.161328	0.274737	retina	zebrafish_NMDA_Adult	mouse_NMDA_72hr
0.245369	0.263311	0.301985	0.291261	retina	zebrafish_NMDA_Adult	mouse_NMDA_48hr
0.191696	0.0601699	0.111888	0.213844	retina	zebrafish_NMDA_Adult	mouse_NMDA_36hr
0.25083	0.207881	0.244635	0.296408	retina	zebrafish_NMDA_Adult	mouse_NMDA_24hr
0.173583	0.364921	0.380355	0.336657	retina	zebrafish_NMDA_Adult	mouse_NMDA_12hr
0.21132	0.281869	0.282006	0.309191	retina	zebrafish_NMDA_Adult	mouse_NMDA_6hr
0.250642	0.185626	0.191615	0.271506	retina	zebrafish_NMDA_Adult	mouse_NMDA_3hr
0.0124149	1.68128e-05	0.00225406	0.00115976	retina	zebrafish_NMDA_Adult	Macosko
0.268377	0.502593	0.420884	0.271538	retina	zebrafish_NMDA_36hr	mouse_LD_P60
0.295755	0.351642	0.349243	0.252169	retina	zebrafish_NMDA_36hr	mouse_LD_24hr
0.238829	0.333888	0.287867	0.302519	retina	zebrafish_NMDA_36hr	mouse_LD_10hr
0.299415	0.432544	0.405624	0.334679	retina	zebrafish_NMDA_36hr	mouse_LD_4hr
0.234793	0.303065	0.245981	0.252285	retina	zebrafish_NMDA_36hr	mouse_LD_0hr
0.228782	0.432115	0.376397	0.296141	retina	zebrafish_NMDA_36hr	mouse_NMDA_P60
0.353862	0.460338	0.505596	0.364575	retina	zebrafish_NMDA_36hr	mouse_NMDA_72hr
0.30723	0.325082	0.348815	0.42262	retina	zebrafish_NMDA_36hr	mouse_NMDA_48hr
0.296897	0.343762	0.37953	0.411215	retina	zebrafish_NMDA_36hr	mouse_NMDA_36hr
0.307947	0.495797	0.457082	0.336731	retina	zebrafish_NMDA_36hr	mouse_NMDA_24hr
0.251451	0.521176	0.497751	0.410208	retina	zebrafish_NMDA_36hr	mouse_NMDA_12hr
0.274029	0.477606	0.41793	0.359898	retina	zebrafish_NMDA_36hr	mouse_NMDA_6hr
0.322632	0.400128	0.391158	0.319708	retina	zebrafish_NMDA_36hr	mouse_NMDA_3hr
0.311087	0.627539	0.662493	0.292174	retina	zebrafish_NMDA_36hr	Macosko
0.23165	0.431444	0.360711	0.23	retina	zebrafish_NMDA_20hr	mouse_LD_P60
0.281042	0.304167	0.27439	0.228309	retina	zebrafish_NMDA_20hr	mouse_LD_24hr
0.250937	0.292672	0.281431	0.291334	retina	zebrafish_NMDA_20hr	mouse_LD_10hr
0.276466	0.410748	0.354557	0.285532	retina	zebrafish_NMDA_20hr	mouse_LD_4hr
0.225308	0.366505	0.274971	0.22487	retina	zebrafish_NMDA_20hr	mouse_LD_0hr
0.224086	0.384715	0.373349	0.269854	retina	zebrafish_NMDA_20hr	mouse_NMDA_P60
0.258708	0.423429	0.380548	0.318217	retina	zebrafish_NMDA_20hr	mouse_NMDA_72hr
0.330353	0.478842	0.505492	0.423091	retina	zebrafish_NMDA_20hr	mouse_NMDA_48hr
0.201294	0.372028	0.368722	0.346034	retina	zebrafish_NMDA_20hr	mouse_NMDA_36hr
0.269856	0.462366	0.434907	0.350566	retina	zebrafish_NMDA_20hr	mouse_NMDA_24hr
0.193024	0.24058	0.266982	0.339171	retina	zebrafish_NMDA_20hr	mouse_NMDA_12hr
0.265791	0.474505	0.400838	0.326035	retina	zebrafish_NMDA_20hr	mouse_NMDA_6hr
0.225761	0.277758	0.227493	0.285035	retina	zebrafish_NMDA_20hr	mouse_NMDA_3hr
0.000432499	1.34824e-06	0.00236565	0.000713316	retina	zebrafish_NMDA_20hr	Macosko
0.273795	0.377696	0.358089	0.273536	retina	zebrafish_NMDA_10hr	mouse_LD_P60
0.308966	0.335746	0.349664	0.250641	retina	zebrafish_NMDA_10hr	mouse_LD_24hr
0.264347	0.307562	0.302464	0.308221	retina	zebrafish_NMDA_10hr	mouse_LD_10hr
0.247938	0.327338	0.287654	0.291339	retina	zebrafish_NMDA_10hr	mouse_LD_4hr
0.221366	0.360182	0.287534	0.241905	retina	zebrafish_NMDA_10hr	mouse_LD_0hr
0.239979	0.422394	0.379445	0.27147	retina	zebrafish_NMDA_10hr	mouse_NMDA_P60
0.272109	0.422672	0.433037	0.369753	retina	zebrafish_NMDA_10hr	mouse_NMDA_72hr
0.324712	0.418607	0.423396	0.378482	retina	zebrafish_NMDA_10hr	mouse_NMDA_48hr
0.292586	0.358233	0.44946	0.453587	retina	zebrafish_NMDA_10hr	mouse_NMDA_36hr
0.294245	0.308959	0.347163	0.320823	retina	zebrafish_NMDA_10hr	mouse_NMDA_24hr
0.249791	0.586987	0.562367	0.435115	retina	zebrafish_NMDA_10hr	mouse_NMDA_12hr
0.294638	0.433544	0.446469	0.363874	retina	zebrafish_NMDA_10hr	mouse_NMDA_6hr
0.31078	0.204781	0.248589	0.323261	retina	zebrafish_NMDA_10hr	mouse_NMDA_3hr
0.213116	0.37289	0.471657	0.215711	retina	zebrafish_NMDA_10hr	Macosko
0.250218	0.377179	0.415771	0.268466	retina	zebrafish_NMDA_4hr	mouse_LD_P60
0.281221	0.210399	0.247687	0.268429	retina	zebrafish_NMDA_4hr	mouse_LD_24hr
0.215423	0.216385	0.231989	0.263573	retina	zebrafish_NMDA_4hr	mouse_LD_10hr
0.224731	0.252413	0.261151	0.275636	retina	zebrafish_NMDA_4hr	mouse_LD_4hr
0.274663	0.304344	0.344812	0.280666	retina	zebrafish_NMDA_4hr	mouse_LD_0hr
0.219975	0.294957	0.30614	0.299425	retina	zebrafish_NMDA_4hr	mouse_NMDA_P60
0.232076	0.208042	0.264377	0.285646	retina	zebrafish_NMDA_4hr	mouse_NMDA_72hr
0.256303	0.228148	0.219888	0.309428	retina	zebrafish_NMDA_4hr	mouse_NMDA_48hr
0.20273	0.218156	0.221233	0.375345	retina	zebrafish_NMDA_4hr	mouse_NMDA_36hr
0.211673	0.197652	0.241536	0.330085	retina	zebrafish_NMDA_4hr	mouse_NMDA_24hr
0.235215	0.340335	0.385799	0.35572	retina	zebrafish_NMDA_4hr	mouse_NMDA_12hr
0.272051	0.334341	0.34634	0.310643	retina	zebrafish_NMDA_4hr	mouse_NMDA_6hr
0.304408	0.423366	0.420317	0.345145	retina	zebrafish_NMDA_4hr	mouse_NMDA_3hr
0.0810681	0.0163843	0.0678673	0.0780253	retina	zebrafish_NMDA_4hr	Macosko
0.265303	0.351121	0.334098	0.27114	retina	zebrafish_LD_Adult	mouse_LD_P60
0.276351	0.272437	0.272708	0.251001	retina	zebrafish_LD_Adult	mouse_LD_24hr
0.207332	0.115975	0.142678	0.166783	retina	zebrafish_LD_Adult	mouse_LD_10hr
0.194714	0.100743	0.128313	0.202171	retina	zebrafish_LD_Adult	mouse_LD_4hr
0.267716	0.167871	0.207854	0.210518	retina	zebrafish_LD_Adult	mouse_LD_0hr
0.259388	0.220331	0.27377	0.213564	retina	zebrafish_LD_Adult	mouse_NMDA_P60
0.185729	0.171476	0.17638	0.203265	retina	zebrafish_LD_Adult	mouse_NMDA_72hr
0.266845	0.260497	0.222972	0.291319	retina	zebrafish_LD_Adult	mouse_NMDA_48hr
0.148609	0.0666156	0.104259	0.245752	retina	zebrafish_LD_Adult	mouse_NMDA_36hr
0.179307	0.146871	0.203863	0.274888	retina	zebrafish_LD_Adult	mouse_NMDA_24hr
0.187571	0.257889	0.284497	0.317561	retina	zebrafish_LD_Adult	mouse_NMDA_12hr
0.198078	0.234492	0.277169	0.257726	retina	zebrafish_LD_Adult	mouse_NMDA_6hr
0.240417	0.288264	0.259876	0.238131	retina	zebrafish_LD_Adult	mouse_NMDA_3hr
0.106328	0.0374403	0.0593421	0.084013	retina	zebrafish_LD_Adult	Macosko
0.298075	0.3682	0.411248	0.246525	retina	zebrafish_LD_36hr	mouse_LD_P60
0.287294	0.141188	0.18566	0.192611	retina	zebrafish_LD_36hr	mouse_LD_24hr
0.280447	0.228546	0.312196	0.267716	retina	zebrafish_LD_36hr	mouse_LD_10hr
0.290996	0.340287	0.344538	0.227877	retina	zebrafish_LD_36hr	mouse_LD_4hr
0.310479	0.452762	0.495827	0.297582	retina	zebrafish_LD_36hr	mouse_LD_0hr
0.289124	0.331129	0.401655	0.284998	retina	zebrafish_LD_36hr	mouse_NMDA_P60
0.258509	0.161771	0.244693	0.244942	retina	zebrafish_LD_36hr	mouse_NMDA_72hr
0.333391	0.229707	0.322606	0.395215	retina	zebrafish_LD_36hr	mouse_NMDA_48hr
0.354308	0.452233	0.54609	0.406985	retina	zebrafish_LD_36hr	mouse_NMDA_36hr
0.303405	0.224566	0.276586	0.248748	retina	zebrafish_LD_36hr	mouse_NMDA_24hr
0.322362	0.381614	0.473846	0.343028	retina	zebrafish_LD_36hr	mouse_NMDA_12hr
0.336697	0.407272	0.470332	0.339704	retina	zebrafish_LD_36hr	mouse_NMDA_6hr
0.288118	0.235034	0.271164	0.261535	retina	zebrafish_LD_36hr	mouse_NMDA_3hr
0.270183	0.585861	0.639685	0.253699	retina	zebrafish_LD_36hr	Macosko
0.215312	0.35887	0.29241	0.158368	retina	zebrafish_LD_20hr	mouse_LD_P60
0.255059	0.325502	0.300252	0.225047	retina	zebrafish_LD_20hr	mouse_LD_24hr
0.267613	0.272282	0.293204	0.26126	retina	zebrafish_LD_20hr	mouse_LD_10hr
0.271819	0.300469	0.311248	0.253664	retina	zebrafish_LD_20hr	mouse_LD_4hr
0.192498	0.26363	0.193271	0.216215	retina	zebrafish_LD_20hr	mouse_LD_0hr
0.237974	0.388892	0.403397	0.280913	retina	zebrafish_LD_20hr	mouse_NMDA_P60
0.209055	0.251314	0.25743	0.245462	retina	zebrafish_LD_20hr	mouse_NMDA_72hr
0.299236	0.485379	0.469069	0.39638	retina	zebrafish_LD_20hr	mouse_NMDA_48hr
0.220013	0.336927	0.342022	0.311652	retina	zebrafish_LD_20hr	mouse_NMDA_36hr
0.272958	0.449063	0.393419	0.230557	retina	zebrafish_LD_20hr	mouse_NMDA_24hr
0.218051	0.353355	0.408521	0.241904	retina	zebrafish_LD_20hr	mouse_NMDA_12hr
0.26457	0.408164	0.372622	0.252625	retina	zebrafish_LD_20hr	mouse_NMDA_6hr
0.287527	0.338912	0.296694	0.289932	retina	zebrafish_LD_20hr	mouse_NMDA_3hr
0	0	0.00189698	5.21488e-05	retina	zebrafish_LD_20hr	Macosko
0.186467	0.242433	0.255703	0.20176	retina	zebrafish_LD_10hr	mouse_LD_P60
0.23217	0.237315	0.220984	0.183263	retina	zebrafish_LD_10hr	mouse_LD_24hr
0.205203	0.173826	0.192278	0.208704	retina	zebrafish_LD_10hr	mouse_LD_10hr
0.210902	0.33514	0.251454	0.18829	retina	zebrafish_LD_10hr	mouse_LD_4hr
0.245287	0.266404	0.311166	0.212987	retina	zebrafish_LD_10hr	mouse_LD_0hr
0.197884	0.170225	0.217738	0.198084	retina	zebrafish_LD_10hr	mouse_NMDA_P60
0.219956	0.376659	0.377846	0.295799	retina	zebrafish_LD_10hr	mouse_NMDA_72hr
0.322557	0.394023	0.422432	0.35343	retina	zebrafish_LD_10hr	mouse_NMDA_48hr
0.179199	0.147817	0.197711	0.271586	retina	zebrafish_LD_10hr	mouse_NMDA_36hr
0.147794	0.144012	0.19361	0.200736	retina	zebrafish_LD_10hr	mouse_NMDA_24hr
0.228551	0.425664	0.463905	0.335048	retina	zebrafish_LD_10hr	mouse_NMDA_12hr
0.246562	0.265715	0.319574	0.27314	retina	zebrafish_LD_10hr	mouse_NMDA_6hr
0.229656	0.263316	0.266864	0.278431	retina	zebrafish_LD_10hr	mouse_NMDA_3hr
0.216944	0.107679	0.207597	0.17693	retina	zebrafish_LD_10hr	Macosko
0.246528	0.335231	0.335802	0.232325	retina	zebrafish_LD_4hr	mouse_LD_P60
0.269559	0.367974	0.334945	0.272964	retina	zebrafish_LD_4hr	mouse_LD_24hr
0.17027	0.274059	0.269502	0.263923	retina	zebrafish_LD_4hr	mouse_LD_10hr
0.241191	0.334022	0.297027	0.275559	retina	zebrafish_LD_4hr	mouse_LD_4hr
0.266124	0.366982	0.345427	0.252289	retina	zebrafish_LD_4hr	mouse_LD_0hr
0.254778	0.457247	0.419655	0.30207	retina	zebrafish_LD_4hr	mouse_NMDA_P60
0.234935	0.431571	0.370513	0.321393	retina	zebrafish_LD_4hr	mouse_NMDA_72hr
0.202808	0.295406	0.258239	0.376105	retina	zebrafish_LD_4hr	mouse_NMDA_48hr
0.301153	0.340917	0.418945	0.446783	retina	zebrafish_LD_4hr	mouse_NMDA_36hr
0.290963	0.470957	0.488555	0.346881	retina	zebrafish_LD_4hr	mouse_NMDA_24hr
0.250351	0.536022	0.500592	0.379733	retina	zebrafish_LD_4hr	mouse_NMDA_12hr
0.273656	0.474352	0.437923	0.318173	retina	zebrafish_LD_4hr	mouse_NMDA_6hr
0.237149	0.335134	0.318328	0.272416	retina	zebrafish_LD_4hr	mouse_NMDA_3hr
0.277031	0.661448	0.671844	0.272384	retina	zebrafish_LD_4hr	Macosko
0.125755	0.158628	0.215645	0.262732	retina	zebrafish_TNFa_Adult	chick_P10
0.151491	0.183033	0.246038	0.290933	retina	zebrafish_TNFa_72hr	chick_P10
0.139849	0.200842	0.239887	0.237983	retina	zebrafish_TNFa_36hr	chick_P10
0.167912	0.255212	0.302989	0.259066	retina	zebrafish_TNFa_20hr	chick_P10
0.154356	0.171407	0.260004	0.229989	retina	zebrafish_TNFa_10hr	chick_P10
0.170113	0.212085	0.281062	0.265299	retina	zebrafish_NMDA_Adult	chick_P10
0.202583	0.191041	0.258629	0.324691	retina	zebrafish_NMDA_36hr	chick_P10
0.18739	0.181323	0.221507	0.289333	retina	zebrafish_NMDA_20hr	chick_P10
0.122827	0.126331	0.163905	0.292079	retina	zebrafish_NMDA_10hr	chick_P10
0.114433	0.0970558	0.167378	0.173541	retina	zebrafish_NMDA_4hr	chick_P10
0.182027	0.25085	0.310442	0.245251	retina	zebrafish_LD_Adult	chick_P10
0.184137	0.333196	0.352848	0.22201	retina	zebrafish_LD_36hr	chick_P10
0.161315	0.200239	0.223388	0.242081	retina	zebrafish_LD_20hr	chick_P10
0.135713	0.254171	0.269701	0.222677	retina	zebrafish_LD_10hr	chick_P10
0.120936	0.175052	0.175194	0.211282	retina	zebrafish_LD_4hr	chick_P10
0.382921	0.611372	0.624717	0.558037	pancreas	panc8	FACS
0.369429	0.487683	0.576352	0.511626	pancreas	panc8	Baron_mouse
0.555562	0.707706	0.717408	0.553881	pancreas	Baron_human	FACS
0.412027	0.432786	0.541357	0.477066	pancreas	Baron_human	Baron_mouse
0.141577	0.0911786	0.167114	0.232627	pancreas	FACS	Baron_human
0.404117	0.647202	0.65947	0.525119	pancreas	Baron_mouse	Baron_human
0.198692	0.550228	0.200288	0.61555	kidney	Wang_Kidney	Quake_10x_Kidney
0.123546	0.120811	0.204098	0.266885	kidney	Wang_Kidney	Adam
0.0707905	0.1041	0.247663	0.162735	kidney	Wang_Kidney	Park
0.0630276	0.00115371	0.0108847	0.123146	kidney	Wang_Kidney	Karaiskos_mouse
0.227406	0.684886	0.250989	0.552556	kidney	Young	Quake_10x_Kidney
0.124835	0.349937	0.302186	0.361681	kidney	Young	Adam
0.105607	0.628043	0.606744	0.26286	kidney	Young	Park
0.184723	0.411871	0.544311	0.21887	kidney	Young	Karaiskos_mouse
0.266491	0.598239	0.495865	0.546659	kidney	Wu_human	Quake_10x_Kidney
0.182885	0.179676	0.587158	0.357069	kidney	Wu_human	Adam
0.193308	0.475469	0.632758	0.331658	kidney	Wu_human	Park
0.0994991	0.107795	0.253204	0.206769	kidney	Wu_human	Karaiskos_mouse
0.159998	0.338322	0.42251	0.442968	kidney	Hochane	Quake_10x_Kidney
0.141803	0.100312	0.540437	0.318296	kidney	Hochane	Adam
0.0613924	0.17669	0.558944	0.1262	kidney	Hochane	Park
0.130312	0.102712	0.237842	0.0746394	kidney	Hochane	Karaiskos_mouse
0.0823658	0.0965959	0.634856	0.234953	kidney	Quake_10x_Kidney	Wang_Kidney
0.0970131	0.16462	0.306948	0.401916	kidney	Quake_10x_Kidney	Young
0.101036	0.13421	0.539553	0.314396	kidney	Quake_10x_Kidney	Wu_human
0.0945886	0.395221	0.0742845	0.131198	kidney	Quake_10x_Kidney	Hochane
0.147711	0.306536	0.232498	0.164947	kidney	Adam	Wang_Kidney
0.129981	0.195258	0.367282	0.382401	kidney	Adam	Young
0.208703	0.596336	0.59423	0.357516	kidney	Adam	Wu_human
0.236829	0.623503	0.585718	0.506131	kidney	Adam	Hochane
0.0294956	0.100533	0.130066	0.196738	kidney	Park	Wang_Kidney
0.0864651	0.161134	0.18927	0.360966	kidney	Park	Young
0.163979	0.380793	0.458818	0.301453	kidney	Park	Wu_human
0.0579592	0.339879	0.347118	0.385353	kidney	Park	Hochane
0.112304	0.116219	0.308401	0.20327	kidney	Karaiskos_mouse	Wang_Kidney
0.0907883	0.195399	0.309763	0.306821	kidney	Karaiskos_mouse	Young
0.120133	0.289004	0.32806	0.125863	kidney	Karaiskos_mouse	Wu_human
0.180039	0.140794	0.338217	0.207635	kidney	Karaiskos_mouse	Hochane

## Sheet: scmap
Supplemental Table 2. Annotation metrics and CAMUS scores for scmap on cross-species data pairs.
scmap_f1_macro	scmap_f1_weight	scmap_ACC	CAMUS_score	tissue	reference	query
0.212249	0.690789	0.551893	0.16428	brain	Lake_2018	Tasic18
0.355757	0.683503	0.675684	0.662782	brain	Lake_2018	Quake_Smart-seq2_Brain_Non-Myeloid
0.222127	0.435967	0.434778	0.337022	brain	Lake_2018	Campbell
0.277293	0.615747	0.644966	0.542593	brain	Lake_2018	Chen
0.309474	0.695322	0.736088	0.506193	brain	Lake_2018	Tosches_lizard
0.282513	0.827002	0.797203	0.508848	brain	Lake_2018	Tosches_turtle
0.283719	0.78529	0.761795	0.443194	brain	Tasic18	Lake_2018
0.372258	0.643774	0.592281	0.359359	brain	Quake_Smart-seq2_Brain_Non-Myeloid	Lake_2018
0.225515	0.664815	0.590609	0.354538	brain	Campbell	Lake_2018
0.27949	0.583586	0.545779	0.337544	brain	Chen	Lake_2018
0.280087	0.683799	0.748985	0.564008	brain	Tasic18	Tosches_lizard
0.367565	0.604129	0.644375	0.539807	brain	Quake_Smart-seq2_Brain_Non-Myeloid	Tosches_lizard
0.264708	0.702509	0.718175	0.574822	brain	Campbell	Tosches_lizard
0.285661	0.71511	0.725579	0.583538	brain	Chen	Tosches_lizard
0.212385	0.501812	0.588352	0.491023	brain	Tasic18	Tosches_turtle
0.354888	0.65238	0.67365	0.549481	brain	Quake_Smart-seq2_Brain_Non-Myeloid	Tosches_turtle
0.27524	0.84138	0.807062	0.560517	brain	Campbell	Tosches_turtle
0.326626	0.855897	0.847568	0.615932	brain	Chen	Tosches_turtle
0.280722	0.580529	0.573153	0.332462	brain	Tosches_lizard	Lake_2018
0.357062	0.782975	0.775381	0.284768	brain	Tosches_lizard	Tasic18
0.309	0.818722	0.801529	0.688815	brain	Tosches_lizard	Quake_Smart-seq2_Brain_Non-Myeloid
0.266817	0.762357	0.682281	0.440778	brain	Tosches_lizard	Campbell
0.370154	0.81899	0.794772	0.682029	brain	Tosches_lizard	Chen
0.696971	0.947333	0.946635	0.677439	brain	Tosches_lizard	Tosches_turtle
0.194425	0.652473	0.54014	0.226525	brain	Tosches_turtle	Lake_2018
0.116877	0.671081	0.51888	0.0649019	brain	Tosches_turtle	Tasic18
0.178335	0.493705	0.537783	0.403871	brain	Tosches_turtle	Quake_Smart-seq2_Brain_Non-Myeloid
0.209768	0.596897	0.574351	0.393694	brain	Tosches_turtle	Campbell
0.307071	0.740059	0.702209	0.580409	brain	Tosches_turtle	Chen
0.671463	0.896087	0.89539	0.672784	brain	Tosches_turtle	Tosches_lizard
0.317491	0.802266	0.769428	0.577688	testis	testis_human	testis_mouse
0.63002	0.863113	0.854223	0.631542	testis	testis_human	testis_monkey
0.318661	0.687687	0.645732	0.668548	testis	testis_mouse	testis_human
0.270263	0.775431	0.746593	0.621715	testis	testis_mouse	testis_monkey
0.669281	0.811258	0.80675	0.706127	testis	testis_monkey	testis_human
0.278544	0.687937	0.651443	0.534797	testis	testis_monkey	testis_mouse
0.053987	0.224003	0.158692	0.144455	retina	Menon_microfluidics	mouse_LD_P60
0.0689905	0.411709	0.297519	0.128215	retina	Menon_microfluidics	mouse_LD_24hr
0.0422064	0.185154	0.124784	0.101371	retina	Menon_microfluidics	mouse_LD_10hr
0.0601733	0.360253	0.252747	0.131089	retina	Menon_microfluidics	mouse_LD_4hr
0.0549031	0.293144	0.209787	0.12004	retina	Menon_microfluidics	mouse_LD_0hr
0.0644559	0.250707	0.197271	0.203015	retina	Menon_microfluidics	mouse_NMDA_P60
0.0575807	0.209879	0.171362	0.135381	retina	Menon_microfluidics	mouse_NMDA_72hr
0.0896348	0.39723	0.333783	0.188397	retina	Menon_microfluidics	mouse_NMDA_48hr
0.0449613	0.093148	0.106167	0.0668358	retina	Menon_microfluidics	mouse_NMDA_36hr
0.0559754	0.123813	0.111111	0.193771	retina	Menon_microfluidics	mouse_NMDA_24hr
0.0251493	0.034208	0.036213	0.126465	retina	Menon_microfluidics	mouse_NMDA_12hr
0.0627901	0.153127	0.13802	0.193304	retina	Menon_microfluidics	mouse_NMDA_6hr
0.0841668	0.267557	0.239586	0.212046	retina	Menon_microfluidics	mouse_NMDA_3hr
0.199981	0.430181	0.512319	0.256956	retina	Menon_microfluidics	Macosko
0.455731	0.764813	0.759242	0.445794	retina	Menon_seqwell	mouse_LD_P60
0.447987	0.704326	0.718671	0.507724	retina	Menon_seqwell	mouse_LD_24hr
0.436988	0.825018	0.814943	0.519517	retina	Menon_seqwell	mouse_LD_10hr
0.467403	0.737131	0.740789	0.510722	retina	Menon_seqwell	mouse_LD_4hr
0.419328	0.714773	0.729685	0.479078	retina	Menon_seqwell	mouse_LD_0hr
0.434922	0.724564	0.718972	0.485919	retina	Menon_seqwell	mouse_NMDA_P60
0.494416	0.841255	0.836743	0.555793	retina	Menon_seqwell	mouse_NMDA_72hr
0.476291	0.851456	0.855271	0.626052	retina	Menon_seqwell	mouse_NMDA_48hr
0.459765	0.814343	0.807374	0.587488	retina	Menon_seqwell	mouse_NMDA_36hr
0.47701	0.868475	0.852647	0.565143	retina	Menon_seqwell	mouse_NMDA_24hr
0.393941	0.864628	0.858225	0.595646	retina	Menon_seqwell	mouse_NMDA_12hr
0.471278	0.794642	0.789262	0.539139	retina	Menon_seqwell	mouse_NMDA_6hr
0.467668	0.790271	0.798307	0.564017	retina	Menon_seqwell	mouse_NMDA_3hr
0.558023	0.915574	0.893814	0.494105	retina	Menon_seqwell	Macosko
0.0809171	0.450068	0.385846	0.275687	retina	Menon_microfluidics	chick_P10
0.3588	0.753349	0.743397	0.507308	retina	Menon_seqwell	chick_P10
0.0211173	0.101753	0.0671286	0.16681	retina	Menon_microfluidics	zebrafish_TNFa_Adult
0.030275	0.280571	0.177027	0.122186	retina	Menon_microfluidics	zebrafish_TNFa_72hr
0.0280557	0.255571	0.157282	0.145163	retina	Menon_microfluidics	zebrafish_TNFa_36hr
0.0195121	0.10462	0.0621313	0.225592	retina	Menon_microfluidics	zebrafish_TNFa_20hr
0.0251763	0.136488	0.0842461	0.206769	retina	Menon_microfluidics	zebrafish_TNFa_10hr
0.0196317	0.0941106	0.060816	0.166904	retina	Menon_microfluidics	zebrafish_NMDA_Adult
0.0251429	0.218838	0.127913	0.0788134	retina	Menon_microfluidics	zebrafish_NMDA_36hr
0.027752	0.190947	0.11058	0.101708	retina	Menon_microfluidics	zebrafish_NMDA_20hr
0.0145426	0.115478	0.0662154	0.0994711	retina	Menon_microfluidics	zebrafish_NMDA_10hr
0.0229297	0.124426	0.0782456	0.134991	retina	Menon_microfluidics	zebrafish_NMDA_4hr
0.0200931	0.0960228	0.0628689	0.166836	retina	Menon_microfluidics	zebrafish_LD_Adult
0.0202991	0.196808	0.113424	0.0271444	retina	Menon_microfluidics	zebrafish_LD_36hr
0.0194122	0.149877	0.0894752	0.0762411	retina	Menon_microfluidics	zebrafish_LD_20hr
0.0175643	0.0887056	0.0531956	0.156186	retina	Menon_microfluidics	zebrafish_LD_10hr
0.0243842	0.104069	0.0684892	0.214168	retina	Menon_microfluidics	zebrafish_LD_4hr
0.137166	0.219116	0.212574	0.213087	retina	Menon_seqwell	zebrafish_TNFa_Adult
0.1469	0.319844	0.270584	0.226198	retina	Menon_seqwell	zebrafish_TNFa_72hr
0.12802	0.278767	0.235125	0.212719	retina	Menon_seqwell	zebrafish_TNFa_36hr
0.143738	0.204143	0.209595	0.233667	retina	Menon_seqwell	zebrafish_TNFa_20hr
0.133498	0.203886	0.193367	0.252564	retina	Menon_seqwell	zebrafish_TNFa_10hr
0.167136	0.320744	0.288889	0.213087	retina	Menon_seqwell	zebrafish_NMDA_Adult
0.172065	0.300131	0.248389	0.206226	retina	Menon_seqwell	zebrafish_NMDA_36hr
0.175899	0.279565	0.235716	0.238009	retina	Menon_seqwell	zebrafish_NMDA_20hr
0.175777	0.33705	0.30146	0.254328	retina	Menon_seqwell	zebrafish_NMDA_10hr
0.140711	0.339079	0.275484	0.228419	retina	Menon_seqwell	zebrafish_NMDA_4hr
0.171731	0.345598	0.309161	0.213087	retina	Menon_seqwell	zebrafish_LD_Adult
0.0874214	0.208218	0.183738	0.122921	retina	Menon_seqwell	zebrafish_LD_36hr
0.0977713	0.180907	0.16362	0.127933	retina	Menon_seqwell	zebrafish_LD_20hr
0.109164	0.153695	0.153655	0.19209	retina	Menon_seqwell	zebrafish_LD_10hr
0.162552	0.242122	0.231942	0.281306	retina	Menon_seqwell	zebrafish_LD_4hr
0.457118	0.829534	0.817381	0.58416	retina	mouse_LD_P60	Menon_microfluidics
0.38345	0.807098	0.781404	0.58742	retina	mouse_LD_P60	Menon_seqwell
0.482518	0.797906	0.783535	0.555275	retina	mouse_LD_24hr	Menon_microfluidics
0.437863	0.818298	0.783867	0.571451	retina	mouse_LD_24hr	Menon_seqwell
0.413989	0.713528	0.717187	0.500755	retina	mouse_LD_10hr	Menon_microfluidics
0.451888	0.82129	0.795567	0.581708	retina	mouse_LD_10hr	Menon_seqwell
0.501816	0.81325	0.802897	0.578836	retina	mouse_LD_4hr	Menon_microfluidics
0.476525	0.831335	0.798645	0.594107	retina	mouse_LD_4hr	Menon_seqwell
0.410039	0.799738	0.781743	0.541349	retina	mouse_LD_0hr	Menon_microfluidics
0.461935	0.816703	0.810345	0.619315	retina	mouse_LD_0hr	Menon_seqwell
0.396427	0.787392	0.787766	0.561002	retina	mouse_NMDA_P60	Menon_microfluidics
0.325505	0.776763	0.758621	0.603264	retina	mouse_NMDA_P60	Menon_seqwell
0.453759	0.834295	0.821562	0.591372	retina	mouse_NMDA_72hr	Menon_microfluidics
0.428352	0.798382	0.784175	0.621234	retina	mouse_NMDA_72hr	Menon_seqwell
0.467948	0.819279	0.817281	0.571208	retina	mouse_NMDA_48hr	Menon_microfluidics
0.479794	0.842087	0.83436	0.626937	retina	mouse_NMDA_48hr	Menon_seqwell
0.437959	0.844388	0.825195	0.582694	retina	mouse_NMDA_36hr	Menon_microfluidics
0.419592	0.600457	0.593596	0.616223	retina	mouse_NMDA_36hr	Menon_seqwell
0.429119	0.796336	0.790105	0.568146	retina	mouse_NMDA_24hr	Menon_microfluidics
0.432921	0.82013	0.774015	0.585687	retina	mouse_NMDA_24hr	Menon_seqwell
0.452972	0.685518	0.712409	0.550951	retina	mouse_NMDA_12hr	Menon_microfluidics
0.440372	0.714211	0.748461	0.539048	retina	mouse_NMDA_12hr	Menon_seqwell
0.398918	0.668443	0.701807	0.517195	retina	mouse_NMDA_6hr	Menon_microfluidics
0.400628	0.771863	0.787869	0.614532	retina	mouse_NMDA_6hr	Menon_seqwell
0.415339	0.705659	0.726893	0.553276	retina	mouse_NMDA_3hr	Menon_microfluidics
0.400256	0.803559	0.80234	0.640262	retina	mouse_NMDA_3hr	Menon_seqwell
0.465444	0.695923	0.725499	0.528539	retina	Macosko	Menon_microfluidics
0.504405	0.803585	0.820197	0.625143	retina	Macosko	Menon_seqwell
0.20573	0.473285	0.506621	0.427559	retina	mouse_LD_P60	chick_P10
0.262745	0.490691	0.522759	0.443247	retina	mouse_LD_24hr	chick_P10
0.27129	0.631137	0.611766	0.491212	retina	mouse_LD_10hr	chick_P10
0.298827	0.666915	0.64187	0.503246	retina	mouse_LD_4hr	chick_P10
0.193096	0.319905	0.381721	0.345997	retina	mouse_LD_0hr	chick_P10
0.172167	0.377496	0.422607	0.391714	retina	mouse_NMDA_P60	chick_P10
0.331897	0.661499	0.676243	0.487677	retina	mouse_NMDA_72hr	chick_P10
0.319299	0.726682	0.720385	0.523991	retina	mouse_NMDA_48hr	chick_P10
0.300142	0.680665	0.644041	0.441853	retina	mouse_NMDA_36hr	chick_P10
0.376422	0.620128	0.657356	0.47053	retina	mouse_NMDA_24hr	chick_P10
0.313294	0.65523	0.661263	0.475284	retina	mouse_NMDA_12hr	chick_P10
0.110792	0.151409	0.175555	0.273278	retina	mouse_NMDA_6hr	chick_P10
0.130507	0.192711	0.271583	0.345566	retina	mouse_NMDA_3hr	chick_P10
0.335714	0.708065	0.69882	0.535215	retina	Macosko	chick_P10
0.220347	0.219626	0.263895	0.205649	retina	mouse_LD_P60	zebrafish_TNFa_Adult
0.183028	0.267358	0.300088	0.246891	retina	mouse_LD_P60	zebrafish_TNFa_72hr
0.15404	0.227825	0.254267	0.220793	retina	mouse_LD_P60	zebrafish_TNFa_36hr
0.146088	0.206886	0.222965	0.23272	retina	mouse_LD_P60	zebrafish_TNFa_20hr
0.148416	0.197368	0.21906	0.232875	retina	mouse_LD_P60	zebrafish_TNFa_10hr
0.240465	0.244611	0.297357	0.205663	retina	mouse_LD_P60	zebrafish_NMDA_Adult
0.177078	0.213587	0.23996	0.25131	retina	mouse_LD_P60	zebrafish_NMDA_36hr
0.165222	0.187241	0.210298	0.196532	retina	mouse_LD_P60	zebrafish_NMDA_20hr
0.147864	0.19222	0.193146	0.188017	retina	mouse_LD_P60	zebrafish_NMDA_10hr
0.233252	0.215426	0.270881	0.212629	retina	mouse_LD_P60	zebrafish_NMDA_4hr
0.241418	0.23927	0.30408	0.205649	retina	mouse_LD_P60	zebrafish_LD_Adult
0.0871801	0.0704517	0.0849455	0.113831	retina	mouse_LD_P60	zebrafish_LD_36hr
0.0965721	0.131874	0.137087	0.130616	retina	mouse_LD_P60	zebrafish_LD_20hr
0.100039	0.149548	0.142174	0.135205	retina	mouse_LD_P60	zebrafish_LD_10hr
0.162794	0.197452	0.232518	0.195708	retina	mouse_LD_P60	zebrafish_LD_4hr
0.218517	0.270515	0.285964	0.21386	retina	mouse_LD_24hr	zebrafish_TNFa_Adult
0.191442	0.377605	0.348254	0.270158	retina	mouse_LD_24hr	zebrafish_TNFa_72hr
0.174068	0.356289	0.334344	0.257344	retina	mouse_LD_24hr	zebrafish_TNFa_36hr
0.187194	0.295372	0.305151	0.267809	retina	mouse_LD_24hr	zebrafish_TNFa_20hr
0.18894	0.301684	0.304432	0.251417	retina	mouse_LD_24hr	zebrafish_TNFa_10hr
0.244492	0.354286	0.355402	0.213778	retina	mouse_LD_24hr	zebrafish_NMDA_Adult
0.2046	0.337829	0.305404	0.268874	retina	mouse_LD_24hr	zebrafish_NMDA_36hr
0.213256	0.305208	0.273735	0.261769	retina	mouse_LD_24hr	zebrafish_NMDA_20hr
0.159646	0.304268	0.266131	0.239126	retina	mouse_LD_24hr	zebrafish_NMDA_10hr
0.247359	0.410576	0.389333	0.233156	retina	mouse_LD_24hr	zebrafish_NMDA_4hr
0.245244	0.353211	0.371619	0.213798	retina	mouse_LD_24hr	zebrafish_LD_Adult
0.0767463	0.216941	0.152902	0.126626	retina	mouse_LD_24hr	zebrafish_LD_36hr
0.10895	0.223457	0.198113	0.155891	retina	mouse_LD_24hr	zebrafish_LD_20hr
0.0981557	0.17082	0.152698	0.213438	retina	mouse_LD_24hr	zebrafish_LD_10hr
0.22318	0.272646	0.303597	0.226246	retina	mouse_LD_24hr	zebrafish_LD_4hr
0.199054	0.30548	0.302694	0.190325	retina	mouse_LD_10hr	zebrafish_TNFa_Adult
0.162984	0.527452	0.459085	0.241445	retina	mouse_LD_10hr	zebrafish_TNFa_72hr
0.158393	0.549704	0.464189	0.245447	retina	mouse_LD_10hr	zebrafish_TNFa_36hr
0.181386	0.492063	0.424695	0.249381	retina	mouse_LD_10hr	zebrafish_TNFa_20hr
0.211019	0.500778	0.441089	0.278159	retina	mouse_LD_10hr	zebrafish_TNFa_10hr
0.222903	0.399507	0.379677	0.190318	retina	mouse_LD_10hr	zebrafish_NMDA_Adult
0.206886	0.635421	0.558007	0.279414	retina	mouse_LD_10hr	zebrafish_NMDA_36hr
0.209979	0.630506	0.5403	0.278603	retina	mouse_LD_10hr	zebrafish_NMDA_20hr
0.181854	0.552754	0.454199	0.232977	retina	mouse_LD_10hr	zebrafish_NMDA_10hr
0.233668	0.514177	0.439014	0.243845	retina	mouse_LD_10hr	zebrafish_NMDA_4hr
0.228529	0.403256	0.394303	0.190321	retina	mouse_LD_10hr	zebrafish_LD_Adult
0.14812	0.654052	0.552882	0.172712	retina	mouse_LD_10hr	zebrafish_LD_36hr
0.142783	0.537646	0.406397	0.183514	retina	mouse_LD_10hr	zebrafish_LD_20hr
0.15195	0.523407	0.401646	0.205423	retina	mouse_LD_10hr	zebrafish_LD_10hr
0.241463	0.469351	0.415252	0.254877	retina	mouse_LD_10hr	zebrafish_LD_4hr
0.256621	0.357693	0.370028	0.247764	retina	mouse_LD_4hr	zebrafish_TNFa_Adult
0.182641	0.417324	0.390745	0.248802	retina	mouse_LD_4hr	zebrafish_TNFa_72hr
0.174166	0.432714	0.400542	0.247711	retina	mouse_LD_4hr	zebrafish_TNFa_36hr
0.230109	0.421305	0.411915	0.279546	retina	mouse_LD_4hr	zebrafish_TNFa_20hr
0.233887	0.459866	0.447845	0.302197	retina	mouse_LD_4hr	zebrafish_TNFa_10hr
0.287046	0.435546	0.439004	0.247685	retina	mouse_LD_4hr	zebrafish_NMDA_Adult
0.252832	0.431844	0.429103	0.284089	retina	mouse_LD_4hr	zebrafish_NMDA_36hr
0.225822	0.410035	0.395394	0.242268	retina	mouse_LD_4hr	zebrafish_NMDA_20hr
0.164399	0.346672	0.316691	0.222813	retina	mouse_LD_4hr	zebrafish_NMDA_10hr
0.255499	0.4692	0.437525	0.270333	retina	mouse_LD_4hr	zebrafish_NMDA_4hr
0.288977	0.432291	0.443007	0.247733	retina	mouse_LD_4hr	zebrafish_LD_Adult
0.132374	0.268777	0.251007	0.135862	retina	mouse_LD_4hr	zebrafish_LD_36hr
0.143453	0.329166	0.291274	0.17319	retina	mouse_LD_4hr	zebrafish_LD_20hr
0.130403	0.258602	0.239763	0.224815	retina	mouse_LD_4hr	zebrafish_LD_10hr
0.28202	0.438919	0.418417	0.282194	retina	mouse_LD_4hr	zebrafish_LD_4hr
0.199065	0.201604	0.216885	0.213458	retina	mouse_LD_0hr	zebrafish_TNFa_Adult
0.181901	0.302452	0.283571	0.247444	retina	mouse_LD_0hr	zebrafish_TNFa_72hr
0.153942	0.268735	0.254746	0.242978	retina	mouse_LD_0hr	zebrafish_TNFa_36hr
0.146014	0.206929	0.206056	0.228171	retina	mouse_LD_0hr	zebrafish_TNFa_20hr
0.154253	0.203961	0.203706	0.238487	retina	mouse_LD_0hr	zebrafish_TNFa_10hr
0.226319	0.278015	0.286887	0.213412	retina	mouse_LD_0hr	zebrafish_NMDA_Adult
0.177008	0.277765	0.244918	0.269455	retina	mouse_LD_0hr	zebrafish_NMDA_36hr
0.171389	0.244432	0.212253	0.221753	retina	mouse_LD_0hr	zebrafish_NMDA_20hr
0.162477	0.260636	0.245822	0.182221	retina	mouse_LD_0hr	zebrafish_NMDA_10hr
0.206469	0.28224	0.275755	0.223429	retina	mouse_LD_0hr	zebrafish_NMDA_4hr
0.22424	0.268444	0.297254	0.213462	retina	mouse_LD_0hr	zebrafish_LD_Adult
0.125266	0.130869	0.117254	0.14186	retina	mouse_LD_0hr	zebrafish_LD_36hr
0.109937	0.148928	0.133255	0.13101	retina	mouse_LD_0hr	zebrafish_LD_20hr
0.104246	0.15445	0.139112	0.128264	retina	mouse_LD_0hr	zebrafish_LD_10hr
0.15772	0.205562	0.218993	0.222732	retina	mouse_LD_0hr	zebrafish_LD_4hr
0.14121	0.191948	0.233051	0.206656	retina	mouse_NMDA_P60	zebrafish_TNFa_Adult
0.113557	0.172315	0.198966	0.208456	retina	mouse_NMDA_P60	zebrafish_TNFa_72hr
0.0997924	0.19131	0.202106	0.214669	retina	mouse_NMDA_P60	zebrafish_TNFa_36hr
0.104827	0.207462	0.214904	0.25332	retina	mouse_NMDA_P60	zebrafish_TNFa_20hr
0.101414	0.187236	0.198792	0.243758	retina	mouse_NMDA_P60	zebrafish_TNFa_10hr
0.155458	0.199008	0.250295	0.206649	retina	mouse_NMDA_P60	zebrafish_NMDA_Adult
0.119809	0.172287	0.195835	0.254467	retina	mouse_NMDA_P60	zebrafish_NMDA_36hr
0.12701	0.164147	0.189224	0.212517	retina	mouse_NMDA_P60	zebrafish_NMDA_20hr
0.114323	0.17642	0.178337	0.20592	retina	mouse_NMDA_P60	zebrafish_NMDA_10hr
0.14919	0.172392	0.213619	0.207525	retina	mouse_NMDA_P60	zebrafish_NMDA_4hr
0.151851	0.195444	0.253528	0.206656	retina	mouse_NMDA_P60	zebrafish_LD_Adult
0.0541724	0.0691994	0.0766965	0.116252	retina	mouse_NMDA_P60	zebrafish_LD_36hr
0.0703995	0.113408	0.12102	0.142453	retina	mouse_NMDA_P60	zebrafish_LD_20hr
0.0684882	0.137155	0.124569	0.158029	retina	mouse_NMDA_P60	zebrafish_LD_10hr
0.136287	0.207602	0.243453	0.226433	retina	mouse_NMDA_P60	zebrafish_LD_4hr
0.255203	0.443486	0.437259	0.283929	retina	mouse_NMDA_72hr	zebrafish_TNFa_Adult
0.216676	0.540816	0.506746	0.34683	retina	mouse_NMDA_72hr	zebrafish_TNFa_72hr
0.207837	0.547362	0.501834	0.332226	retina	mouse_NMDA_72hr	zebrafish_TNFa_36hr
0.24713	0.46913	0.443964	0.33175	retina	mouse_NMDA_72hr	zebrafish_TNFa_20hr
0.265339	0.526649	0.502917	0.372316	retina	mouse_NMDA_72hr	zebrafish_TNFa_10hr
0.290886	0.506699	0.503823	0.283896	retina	mouse_NMDA_72hr	zebrafish_NMDA_Adult
0.271103	0.556305	0.553793	0.375303	retina	mouse_NMDA_72hr	zebrafish_NMDA_36hr
0.284586	0.609276	0.580491	0.366063	retina	mouse_NMDA_72hr	zebrafish_NMDA_20hr
0.245611	0.377835	0.381426	0.278532	retina	mouse_NMDA_72hr	zebrafish_NMDA_10hr
0.283727	0.46476	0.448355	0.292031	retina	mouse_NMDA_72hr	zebrafish_NMDA_4hr
0.292692	0.49927	0.503105	0.283989	retina	mouse_NMDA_72hr	zebrafish_LD_Adult
0.129861	0.364691	0.36011	0.230177	retina	mouse_NMDA_72hr	zebrafish_LD_36hr
0.157793	0.416476	0.354216	0.211025	retina	mouse_NMDA_72hr	zebrafish_LD_20hr
0.168031	0.361268	0.317643	0.224308	retina	mouse_NMDA_72hr	zebrafish_LD_10hr
0.264894	0.450625	0.428777	0.292782	retina	mouse_NMDA_72hr	zebrafish_LD_4hr
0.291806	0.440091	0.443469	0.279085	retina	mouse_NMDA_48hr	zebrafish_TNFa_Adult
0.294585	0.531149	0.539528	0.359493	retina	mouse_NMDA_48hr	zebrafish_TNFa_72hr
0.276493	0.538362	0.529112	0.34623	retina	mouse_NMDA_48hr	zebrafish_TNFa_36hr
0.32113	0.537309	0.506292	0.331707	retina	mouse_NMDA_48hr	zebrafish_TNFa_20hr
0.330773	0.580766	0.546115	0.375922	retina	mouse_NMDA_48hr	zebrafish_TNFa_10hr
0.315344	0.50856	0.499718	0.279087	retina	mouse_NMDA_48hr	zebrafish_NMDA_Adult
0.358099	0.646752	0.639316	0.413044	retina	mouse_NMDA_48hr	zebrafish_NMDA_36hr
0.363768	0.641952	0.627634	0.432414	retina	mouse_NMDA_48hr	zebrafish_NMDA_20hr
0.29385	0.497238	0.461392	0.311908	retina	mouse_NMDA_48hr	zebrafish_NMDA_10hr
0.328489	0.517811	0.478408	0.313342	retina	mouse_NMDA_48hr	zebrafish_NMDA_4hr
0.328011	0.52579	0.519117	0.279112	retina	mouse_NMDA_48hr	zebrafish_LD_Adult
0.22282	0.617688	0.571835	0.275909	retina	mouse_NMDA_48hr	zebrafish_LD_36hr
0.244461	0.538427	0.473172	0.264693	retina	mouse_NMDA_48hr	zebrafish_LD_20hr
0.238541	0.490028	0.429392	0.243803	retina	mouse_NMDA_48hr	zebrafish_LD_10hr
0.355397	0.549943	0.502158	0.303616	retina	mouse_NMDA_48hr	zebrafish_LD_4hr
0.205687	0.476844	0.43418	0.218531	retina	mouse_NMDA_36hr	zebrafish_TNFa_Adult
0.18596	0.594294	0.507502	0.259062	retina	mouse_NMDA_36hr	zebrafish_TNFa_72hr
0.173376	0.590956	0.494656	0.24543	retina	mouse_NMDA_36hr	zebrafish_TNFa_36hr
0.175362	0.496816	0.413685	0.207435	retina	mouse_NMDA_36hr	zebrafish_TNFa_20hr
0.210505	0.551827	0.469854	0.256883	retina	mouse_NMDA_36hr	zebrafish_TNFa_10hr
0.238406	0.543737	0.500385	0.218531	retina	mouse_NMDA_36hr	zebrafish_NMDA_Adult
0.261323	0.671573	0.589241	0.284321	retina	mouse_NMDA_36hr	zebrafish_NMDA_36hr
0.243956	0.655222	0.561156	0.270502	retina	mouse_NMDA_36hr	zebrafish_NMDA_20hr
0.202162	0.466999	0.404273	0.200287	retina	mouse_NMDA_36hr	zebrafish_NMDA_10hr
0.258897	0.49836	0.45025	0.231528	retina	mouse_NMDA_36hr	zebrafish_NMDA_4hr
0.240976	0.537265	0.510033	0.218487	retina	mouse_NMDA_36hr	zebrafish_LD_Adult
0.155568	0.712966	0.583718	0.17609	retina	mouse_NMDA_36hr	zebrafish_LD_36hr
0.149472	0.523142	0.396226	0.169883	retina	mouse_NMDA_36hr	zebrafish_LD_20hr
0.139449	0.461711	0.355721	0.150413	retina	mouse_NMDA_36hr	zebrafish_LD_10hr
0.22203	0.478284	0.404604	0.220912	retina	mouse_NMDA_36hr	zebrafish_LD_4hr
0.1959	0.295854	0.312651	0.215408	retina	mouse_NMDA_24hr	zebrafish_TNFa_Adult
0.142905	0.455867	0.399823	0.230685	retina	mouse_NMDA_24hr	zebrafish_TNFa_72hr
0.139992	0.476109	0.40804	0.217183	retina	mouse_NMDA_24hr	zebrafish_TNFa_36hr
0.171859	0.342368	0.328942	0.203263	retina	mouse_NMDA_24hr	zebrafish_TNFa_20hr
0.193172	0.39259	0.37793	0.239051	retina	mouse_NMDA_24hr	zebrafish_TNFa_10hr
0.227171	0.35987	0.373723	0.215408	retina	mouse_NMDA_24hr	zebrafish_NMDA_Adult
0.231398	0.527504	0.479425	0.226143	retina	mouse_NMDA_24hr	zebrafish_NMDA_36hr
0.209593	0.537266	0.473387	0.209101	retina	mouse_NMDA_24hr	zebrafish_NMDA_20hr
0.169665	0.33123	0.305479	0.188701	retina	mouse_NMDA_24hr	zebrafish_NMDA_10hr
0.234961	0.416447	0.396101	0.222003	retina	mouse_NMDA_24hr	zebrafish_NMDA_4hr
0.228711	0.358838	0.376033	0.215418	retina	mouse_NMDA_24hr	zebrafish_LD_Adult
0.0919074	0.420178	0.360797	0.104783	retina	mouse_NMDA_24hr	zebrafish_LD_36hr
0.10638	0.433828	0.333137	0.122536	retina	mouse_NMDA_24hr	zebrafish_LD_20hr
0.107085	0.313967	0.259663	0.160107	retina	mouse_NMDA_24hr	zebrafish_LD_10hr
0.213016	0.363033	0.345612	0.230728	retina	mouse_NMDA_24hr	zebrafish_LD_4hr
0.190665	0.254265	0.2699	0.204395	retina	mouse_NMDA_12hr	zebrafish_TNFa_Adult
0.156189	0.386267	0.370319	0.228319	retina	mouse_NMDA_12hr	zebrafish_TNFa_72hr
0.163826	0.390039	0.365449	0.221078	retina	mouse_NMDA_12hr	zebrafish_TNFa_36hr
0.182452	0.374699	0.357255	0.229933	retina	mouse_NMDA_12hr	zebrafish_TNFa_20hr
0.19158	0.403191	0.380489	0.256836	retina	mouse_NMDA_12hr	zebrafish_TNFa_10hr
0.229129	0.313419	0.333385	0.204358	retina	mouse_NMDA_12hr	zebrafish_NMDA_Adult
0.235653	0.532155	0.504214	0.261191	retina	mouse_NMDA_12hr	zebrafish_NMDA_36hr
0.209778	0.548672	0.501847	0.235512	retina	mouse_NMDA_12hr	zebrafish_NMDA_20hr
0.233003	0.471619	0.424582	0.224086	retina	mouse_NMDA_12hr	zebrafish_NMDA_10hr
0.243568	0.408983	0.409097	0.237771	retina	mouse_NMDA_12hr	zebrafish_NMDA_4hr
0.211256	0.284991	0.30639	0.204358	retina	mouse_NMDA_12hr	zebrafish_LD_Adult
0.132091	0.651862	0.542866	0.144167	retina	mouse_NMDA_12hr	zebrafish_LD_36hr
0.133838	0.42815	0.337264	0.155122	retina	mouse_NMDA_12hr	zebrafish_LD_20hr
0.150518	0.476145	0.376579	0.207609	retina	mouse_NMDA_12hr	zebrafish_LD_10hr
0.17103	0.352454	0.327482	0.251507	retina	mouse_NMDA_12hr	zebrafish_LD_4hr
0.189595	0.206772	0.217552	0.183713	retina	mouse_NMDA_6hr	zebrafish_TNFa_Adult
0.164613	0.325679	0.312067	0.262316	retina	mouse_NMDA_6hr	zebrafish_TNFa_72hr
0.158278	0.311397	0.300048	0.262707	retina	mouse_NMDA_6hr	zebrafish_TNFa_36hr
0.173364	0.262532	0.269367	0.247	retina	mouse_NMDA_6hr	zebrafish_TNFa_20hr
0.185491	0.290703	0.296653	0.267937	retina	mouse_NMDA_6hr	zebrafish_TNFa_10hr
0.220843	0.234388	0.260867	0.183713	retina	mouse_NMDA_6hr	zebrafish_NMDA_Adult
0.211417	0.345028	0.366386	0.272943	retina	mouse_NMDA_6hr	zebrafish_NMDA_36hr
0.216846	0.366958	0.384966	0.271494	retina	mouse_NMDA_6hr	zebrafish_NMDA_20hr
0.224572	0.322281	0.349482	0.261958	retina	mouse_NMDA_6hr	zebrafish_NMDA_10hr
0.29508	0.384702	0.417626	0.324578	retina	mouse_NMDA_6hr	zebrafish_NMDA_4hr
0.215385	0.227208	0.263074	0.183713	retina	mouse_NMDA_6hr	zebrafish_LD_Adult
0.140503	0.219782	0.247962	0.193078	retina	mouse_NMDA_6hr	zebrafish_LD_36hr
0.166972	0.273741	0.286851	0.205753	retina	mouse_NMDA_6hr	zebrafish_LD_20hr
0.146656	0.23168	0.244546	0.199208	retina	mouse_NMDA_6hr	zebrafish_LD_10hr
0.226736	0.348353	0.388489	0.289559	retina	mouse_NMDA_6hr	zebrafish_LD_4hr
0.189496	0.203461	0.212112	0.188582	retina	mouse_NMDA_3hr	zebrafish_TNFa_Adult
0.157093	0.297653	0.286471	0.272173	retina	mouse_NMDA_3hr	zebrafish_TNFa_72hr
0.161269	0.295165	0.291753	0.276457	retina	mouse_NMDA_3hr	zebrafish_TNFa_36hr
0.200411	0.309895	0.302399	0.261806	retina	mouse_NMDA_3hr	zebrafish_TNFa_20hr
0.200134	0.31401	0.311803	0.280737	retina	mouse_NMDA_3hr	zebrafish_TNFa_10hr
0.225549	0.264288	0.278471	0.188582	retina	mouse_NMDA_3hr	zebrafish_NMDA_Adult
0.205128	0.309454	0.307883	0.300433	retina	mouse_NMDA_3hr	zebrafish_NMDA_36hr
0.228093	0.297326	0.310232	0.27779	retina	mouse_NMDA_3hr	zebrafish_NMDA_20hr
0.214318	0.279732	0.293844	0.23373	retina	mouse_NMDA_3hr	zebrafish_NMDA_10hr
0.321332	0.430526	0.438338	0.321961	retina	mouse_NMDA_3hr	zebrafish_NMDA_4hr
0.229697	0.283467	0.300488	0.188582	retina	mouse_NMDA_3hr	zebrafish_LD_Adult
0.158029	0.197025	0.182657	0.211034	retina	mouse_NMDA_3hr	zebrafish_LD_36hr
0.159566	0.235114	0.229363	0.216995	retina	mouse_NMDA_3hr	zebrafish_LD_20hr
0.162897	0.23294	0.214122	0.188939	retina	mouse_NMDA_3hr	zebrafish_LD_10hr
0.263268	0.42149	0.431942	0.289661	retina	mouse_NMDA_3hr	zebrafish_LD_4hr
0.17528	0.355892	0.343444	0.221603	retina	Macosko	zebrafish_TNFa_Adult
0.217497	0.412098	0.419997	0.224315	retina	Macosko	zebrafish_TNFa_72hr
0.220888	0.473369	0.466741	0.256436	retina	Macosko	zebrafish_TNFa_36hr
0.237853	0.524663	0.491939	0.307972	retina	Macosko	zebrafish_TNFa_20hr
0.242817	0.554974	0.512949	0.322663	retina	Macosko	zebrafish_TNFa_10hr
0.191113	0.357351	0.356377	0.22161	retina	Macosko	zebrafish_NMDA_Adult
0.267892	0.464377	0.485374	0.334675	retina	Macosko	zebrafish_NMDA_36hr
0.261606	0.516027	0.522703	0.353795	retina	Macosko	zebrafish_NMDA_20hr
0.17172	0.290077	0.289824	0.213732	retina	Macosko	zebrafish_NMDA_10hr
0.194164	0.352688	0.344253	0.216128	retina	Macosko	zebrafish_NMDA_4hr
0.19364	0.351881	0.341237	0.22162	retina	Macosko	zebrafish_LD_Adult
0.162577	0.297826	0.342433	0.176718	retina	Macosko	zebrafish_LD_36hr
0.160431	0.352685	0.333432	0.191944	retina	Macosko	zebrafish_LD_20hr
0.160948	0.349412	0.326253	0.171982	retina	Macosko	zebrafish_LD_10hr
0.220974	0.417449	0.38705	0.276035	retina	Macosko	zebrafish_LD_4hr
0.256997	0.756549	0.736449	0.440863	retina	chick_P10	Menon_microfluidics
0.291773	0.766711	0.717672	0.482024	retina	chick_P10	Menon_seqwell
0.262777	0.63928	0.571709	0.359954	retina	chick_P10	mouse_LD_P60
0.269828	0.603582	0.547098	0.377699	retina	chick_P10	mouse_LD_24hr
0.248461	0.492546	0.466489	0.378975	retina	chick_P10	mouse_LD_10hr
0.246379	0.597644	0.527149	0.377065	retina	chick_P10	mouse_LD_4hr
0.285299	0.611782	0.554863	0.390812	retina	chick_P10	mouse_LD_0hr
0.252919	0.666865	0.598926	0.404053	retina	chick_P10	mouse_NMDA_P60
0.25671	0.593053	0.542648	0.388873	retina	chick_P10	mouse_NMDA_72hr
0.238965	0.615739	0.569088	0.457154	retina	chick_P10	mouse_NMDA_48hr
0.234096	0.581069	0.577877	0.437174	retina	chick_P10	mouse_NMDA_36hr
0.261623	0.63435	0.583214	0.425262	retina	chick_P10	mouse_NMDA_24hr
0.232623	0.651883	0.613018	0.450468	retina	chick_P10	mouse_NMDA_12hr
0.265492	0.645362	0.576104	0.405209	retina	chick_P10	mouse_NMDA_6hr
0.26494	0.575458	0.530099	0.405507	retina	chick_P10	mouse_NMDA_3hr
0.258461	0.792015	0.782159	0.378971	retina	chick_P10	Macosko
0.0706333	0.23631	0.190044	0.117431	retina	chick_P10	zebrafish_TNFa_Adult
0.0521997	0.197917	0.151809	0.0839175	retina	chick_P10	zebrafish_TNFa_72hr
0.0634043	0.189876	0.163662	0.115247	retina	chick_P10	zebrafish_TNFa_36hr
0.0791823	0.20611	0.19013	0.152793	retina	chick_P10	zebrafish_TNFa_20hr
0.0893718	0.225024	0.206777	0.16323	retina	chick_P10	zebrafish_TNFa_10hr
0.0884812	0.309282	0.249782	0.117357	retina	chick_P10	zebrafish_NMDA_Adult
0.116779	0.220497	0.212692	0.190892	retina	chick_P10	zebrafish_NMDA_36hr
0.109406	0.240924	0.226157	0.226877	retina	chick_P10	zebrafish_NMDA_20hr
0.0932617	0.291838	0.247726	0.174135	retina	chick_P10	zebrafish_NMDA_10hr
0.0978142	0.354089	0.280357	0.120134	retina	chick_P10	zebrafish_NMDA_4hr
0.0871602	0.305142	0.261842	0.117431	retina	chick_P10	zebrafish_LD_Adult
0.0677814	0.148893	0.145733	0.166206	retina	chick_P10	zebrafish_LD_36hr
0.0722034	0.237548	0.208579	0.128302	retina	chick_P10	zebrafish_LD_20hr
0.0874002	0.185599	0.18982	0.201916	retina	chick_P10	zebrafish_LD_10hr
0.0993182	0.254406	0.231655	0.124273	retina	chick_P10	zebrafish_LD_4hr
0.0856859	0.0247189	0.0427555	0.182626	retina	zebrafish_TNFa_Adult	Menon_microfluidics
0.164472	0.233586	0.264778	0.338274	retina	zebrafish_TNFa_Adult	Menon_seqwell
0.0939938	0.0794199	0.114031	0.217692	retina	zebrafish_TNFa_72hr	Menon_microfluidics
0.211786	0.30496	0.346983	0.379286	retina	zebrafish_TNFa_72hr	Menon_seqwell
0.0704948	0.0702083	0.0768503	0.238057	retina	zebrafish_TNFa_36hr	Menon_microfluidics
0.167336	0.199277	0.267857	0.323899	retina	zebrafish_TNFa_36hr	Menon_seqwell
0.0802322	0.10508	0.0919317	0.223327	retina	zebrafish_TNFa_20hr	Menon_microfluidics
0.173145	0.168865	0.244458	0.364143	retina	zebrafish_TNFa_20hr	Menon_seqwell
0.118021	0.0796868	0.0772983	0.261111	retina	zebrafish_TNFa_10hr	Menon_microfluidics
0.162316	0.0881718	0.150554	0.36426	retina	zebrafish_TNFa_10hr	Menon_seqwell
0.121487	0.226634	0.279976	0.222307	retina	zebrafish_NMDA_Adult	Menon_microfluidics
0.226467	0.361512	0.410406	0.357708	retina	zebrafish_NMDA_Adult	Menon_seqwell
0.197593	0.597523	0.547758	0.236444	retina	zebrafish_NMDA_36hr	Menon_microfluidics
0.209957	0.375084	0.407328	0.406067	retina	zebrafish_NMDA_36hr	Menon_seqwell
0.198318	0.593974	0.553731	0.237887	retina	zebrafish_NMDA_20hr	Menon_microfluidics
0.26166	0.459988	0.512007	0.430465	retina	zebrafish_NMDA_20hr	Menon_seqwell
0.146578	0.467811	0.436763	0.254056	retina	zebrafish_NMDA_10hr	Menon_microfluidics
0.207257	0.270987	0.338362	0.346402	retina	zebrafish_NMDA_10hr	Menon_seqwell
0.110152	0.189942	0.244288	0.189136	retina	zebrafish_NMDA_4hr	Menon_microfluidics
0.130656	0.11352	0.181958	0.333229	retina	zebrafish_NMDA_4hr	Menon_seqwell
0.13839	0.200913	0.265392	0.227182	retina	zebrafish_LD_Adult	Menon_microfluidics
0.245194	0.419383	0.477525	0.38486	retina	zebrafish_LD_Adult	Menon_seqwell
0.106174	0.103535	0.152556	0.145936	retina	zebrafish_LD_36hr	Menon_microfluidics
0.122984	0.0865927	0.155172	0.229459	retina	zebrafish_LD_36hr	Menon_seqwell
0.14725	0.17978	0.251356	0.152374	retina	zebrafish_LD_20hr	Menon_microfluidics
0.230442	0.39134	0.403633	0.259403	retina	zebrafish_LD_20hr	Menon_seqwell
0.140962	0.335002	0.336867	0.161904	retina	zebrafish_LD_10hr	Menon_microfluidics
0.203754	0.342266	0.389163	0.292872	retina	zebrafish_LD_10hr	Menon_seqwell
0.146012	0.467021	0.423125	0.287556	retina	zebrafish_LD_4hr	Menon_microfluidics
0.253773	0.41043	0.462131	0.411704	retina	zebrafish_LD_4hr	Menon_seqwell
0.0988765	0.0410783	0.0534872	0.256435	retina	zebrafish_TNFa_Adult	mouse_LD_P60
0.107593	0.0519449	0.0643398	0.246938	retina	zebrafish_TNFa_Adult	mouse_LD_24hr
0.107806	0.0545549	0.0477162	0.177467	retina	zebrafish_TNFa_Adult	mouse_LD_10hr
0.11756	0.0561102	0.0513898	0.240886	retina	zebrafish_TNFa_Adult	mouse_LD_4hr
0.156824	0.126013	0.11851	0.262636	retina	zebrafish_TNFa_Adult	mouse_LD_0hr
0.0737007	0.0332996	0.0461605	0.26135	retina	zebrafish_TNFa_Adult	mouse_NMDA_P60
0.109398	0.0174387	0.0335778	0.158155	retina	zebrafish_TNFa_Adult	mouse_NMDA_72hr
0.0986367	0.0184747	0.0333398	0.157458	retina	zebrafish_TNFa_Adult	mouse_NMDA_48hr
0.104117	0.011446	0.0178004	0.170981	retina	zebrafish_TNFa_Adult	mouse_NMDA_36hr
0.101843	0.0218659	0.0257511	0.172943	retina	zebrafish_TNFa_Adult	mouse_NMDA_24hr
0.0728429	0.00886796	0.0142012	0.163211	retina	zebrafish_TNFa_Adult	mouse_NMDA_12hr
0.0930868	0.0325537	0.037246	0.235587	retina	zebrafish_TNFa_Adult	mouse_NMDA_6hr
0.128369	0.0893055	0.0818328	0.275346	retina	zebrafish_TNFa_Adult	mouse_NMDA_3hr
0.167928	0.186815	0.164189	0.249391	retina	zebrafish_TNFa_Adult	Macosko
0.141155	0.0816287	0.0883587	0.278153	retina	zebrafish_TNFa_72hr	mouse_LD_P60
0.167275	0.0811385	0.0855761	0.249762	retina	zebrafish_TNFa_72hr	mouse_LD_24hr
0.14008	0.0602196	0.0588605	0.200258	retina	zebrafish_TNFa_72hr	mouse_LD_10hr
0.156244	0.0661909	0.0639948	0.266036	retina	zebrafish_TNFa_72hr	mouse_LD_4hr
0.159164	0.12642	0.112888	0.260495	retina	zebrafish_TNFa_72hr	mouse_LD_0hr
0.109729	0.096356	0.106111	0.314407	retina	zebrafish_TNFa_72hr	mouse_NMDA_P60
0.129483	0.0818749	0.087611	0.300615	retina	zebrafish_TNFa_72hr	mouse_NMDA_72hr
0.143194	0.0834617	0.0894199	0.282891	retina	zebrafish_TNFa_72hr	mouse_NMDA_48hr
0.11425	0.0617297	0.0616656	0.354535	retina	zebrafish_TNFa_72hr	mouse_NMDA_36hr
0.136001	0.0568086	0.0581784	0.270079	retina	zebrafish_TNFa_72hr	mouse_NMDA_24hr
0.109995	0.0308886	0.0338462	0.256281	retina	zebrafish_TNFa_72hr	mouse_NMDA_12hr
0.15845	0.092233	0.0881974	0.367257	retina	zebrafish_TNFa_72hr	mouse_NMDA_6hr
0.164822	0.127955	0.121876	0.340661	retina	zebrafish_TNFa_72hr	mouse_NMDA_3hr
0.206452	0.131096	0.163386	0.297858	retina	zebrafish_TNFa_72hr	Macosko
0.0971602	0.0478029	0.0631227	0.194521	retina	zebrafish_TNFa_36hr	mouse_LD_P60
0.1102	0.0371514	0.0481497	0.155586	retina	zebrafish_TNFa_36hr	mouse_LD_24hr
0.0950366	0.0637482	0.052739	0.180502	retina	zebrafish_TNFa_36hr	mouse_LD_10hr
0.0975501	0.042804	0.0442793	0.177029	retina	zebrafish_TNFa_36hr	mouse_LD_4hr
0.129067	0.0923741	0.0869718	0.161781	retina	zebrafish_TNFa_36hr	mouse_LD_0hr
0.090251	0.0602988	0.0789665	0.250214	retina	zebrafish_TNFa_36hr	mouse_NMDA_P60
0.102661	0.0376296	0.0586646	0.204199	retina	zebrafish_TNFa_36hr	mouse_NMDA_72hr
0.0998643	0.0416908	0.0580073	0.206851	retina	zebrafish_TNFa_36hr	mouse_NMDA_48hr
0.0503456	0.0284344	0.0317864	0.232253	retina	zebrafish_TNFa_36hr	mouse_NMDA_36hr
0.0780492	0.023695	0.0312351	0.198876	retina	zebrafish_TNFa_36hr	mouse_NMDA_24hr
0.0681541	0.0143843	0.019645	0.245946	retina	zebrafish_TNFa_36hr	mouse_NMDA_12hr
0.113241	0.0444975	0.0533699	0.331353	retina	zebrafish_TNFa_36hr	mouse_NMDA_6hr
0.120032	0.0884683	0.088014	0.27877	retina	zebrafish_TNFa_36hr	mouse_NMDA_3hr
0.184601	0.149808	0.228441	0.23548	retina	zebrafish_TNFa_36hr	Macosko
0.0976983	0.0399806	0.0511274	0.229554	retina	zebrafish_TNFa_20hr	mouse_LD_P60
0.114138	0.0591379	0.0658116	0.235417	retina	zebrafish_TNFa_20hr	mouse_LD_24hr
0.0970996	0.0439986	0.0409669	0.187622	retina	zebrafish_TNFa_20hr	mouse_LD_10hr
0.113066	0.059551	0.051713	0.235902	retina	zebrafish_TNFa_20hr	mouse_LD_4hr
0.117022	0.0841448	0.0832821	0.237825	retina	zebrafish_TNFa_20hr	mouse_LD_0hr
0.0672429	0.0440328	0.0576281	0.254142	retina	zebrafish_TNFa_20hr	mouse_NMDA_P60
0.0900281	0.0320408	0.0432266	0.244294	retina	zebrafish_TNFa_20hr	mouse_NMDA_72hr
0.114339	0.0663782	0.0705338	0.278639	retina	zebrafish_TNFa_20hr	mouse_NMDA_48hr
0.091924	0.0156105	0.0311507	0.295799	retina	zebrafish_TNFa_20hr	mouse_NMDA_36hr
0.106955	0.0275475	0.0336195	0.220821	retina	zebrafish_TNFa_20hr	mouse_NMDA_24hr
0.082384	0.0131669	0.0182249	0.200881	retina	zebrafish_TNFa_20hr	mouse_NMDA_12hr
0.107275	0.0480671	0.0506288	0.289848	retina	zebrafish_TNFa_20hr	mouse_NMDA_6hr
0.126801	0.108434	0.100779	0.297081	retina	zebrafish_TNFa_20hr	mouse_NMDA_3hr
0.243132	0.246184	0.325745	0.29542	retina	zebrafish_TNFa_20hr	Macosko
0.109622	0.0518596	0.0732171	0.21082	retina	zebrafish_TNFa_10hr	mouse_LD_P60
0.126963	0.053235	0.0752733	0.21944	retina	zebrafish_TNFa_10hr	mouse_LD_24hr
0.133928	0.0493008	0.0571339	0.198971	retina	zebrafish_TNFa_10hr	mouse_LD_10hr
0.132344	0.049207	0.0652877	0.250714	retina	zebrafish_TNFa_10hr	mouse_LD_4hr
0.142746	0.119558	0.12668	0.218578	retina	zebrafish_TNFa_10hr	mouse_LD_0hr
0.0764111	0.0485646	0.0717085	0.2176	retina	zebrafish_TNFa_10hr	mouse_NMDA_P60
0.121202	0.0517983	0.0779622	0.242373	retina	zebrafish_TNFa_10hr	mouse_NMDA_72hr
0.143592	0.0809362	0.0973213	0.345406	retina	zebrafish_TNFa_10hr	mouse_NMDA_48hr
0.13577	0.0340913	0.0464081	0.356168	retina	zebrafish_TNFa_10hr	mouse_NMDA_36hr
0.116066	0.024401	0.038865	0.2188	retina	zebrafish_TNFa_10hr	mouse_NMDA_24hr
0.131638	0.0186653	0.0293491	0.288435	retina	zebrafish_TNFa_10hr	mouse_NMDA_12hr
0.167416	0.0364179	0.0572396	0.307396	retina	zebrafish_TNFa_10hr	mouse_NMDA_6hr
0.169747	0.0857959	0.106154	0.281474	retina	zebrafish_TNFa_10hr	mouse_NMDA_3hr
0.205229	0.189918	0.169166	0.318004	retina	zebrafish_TNFa_10hr	Macosko
0.146937	0.272658	0.265994	0.303255	retina	zebrafish_NMDA_Adult	mouse_LD_P60
0.154136	0.163058	0.154331	0.272588	retina	zebrafish_NMDA_Adult	mouse_LD_24hr
0.142096	0.117989	0.12965	0.207986	retina	zebrafish_NMDA_Adult	mouse_LD_10hr
0.158493	0.149465	0.15223	0.272059	retina	zebrafish_NMDA_Adult	mouse_LD_4hr
0.196644	0.224279	0.195203	0.285184	retina	zebrafish_NMDA_Adult	mouse_LD_0hr
0.125837	0.255363	0.246625	0.320397	retina	zebrafish_NMDA_Adult	mouse_NMDA_P60
0.132361	0.10201	0.133153	0.190226	retina	zebrafish_NMDA_Adult	mouse_NMDA_72hr
0.124089	0.0349384	0.055502	0.160707	retina	zebrafish_NMDA_Adult	mouse_NMDA_48hr
0.133516	0.137921	0.151303	0.24577	retina	zebrafish_NMDA_Adult	mouse_NMDA_36hr
0.133773	0.156296	0.191464	0.253181	retina	zebrafish_NMDA_Adult	mouse_NMDA_24hr
0.109526	0.248381	0.286627	0.28293	retina	zebrafish_NMDA_Adult	mouse_NMDA_12hr
0.137527	0.240473	0.242825	0.322268	retina	zebrafish_NMDA_Adult	mouse_NMDA_6hr
0.169385	0.172897	0.15305	0.303212	retina	zebrafish_NMDA_Adult	mouse_NMDA_3hr
0.257729	0.715414	0.71909	0.372334	retina	zebrafish_NMDA_Adult	Macosko
0.257658	0.563544	0.479483	0.322227	retina	zebrafish_NMDA_36hr	mouse_LD_P60
0.242182	0.493607	0.430614	0.301909	retina	zebrafish_NMDA_36hr	mouse_LD_24hr
0.191448	0.291731	0.258829	0.321818	retina	zebrafish_NMDA_36hr	mouse_LD_10hr
0.221549	0.414818	0.376212	0.313914	retina	zebrafish_NMDA_36hr	mouse_LD_4hr
0.260224	0.498667	0.405605	0.296164	retina	zebrafish_NMDA_36hr	mouse_LD_0hr
0.230384	0.591477	0.513427	0.348482	retina	zebrafish_NMDA_36hr	mouse_NMDA_P60
0.258199	0.488447	0.445388	0.369038	retina	zebrafish_NMDA_36hr	mouse_NMDA_72hr
0.261704	0.524454	0.498555	0.40478	retina	zebrafish_NMDA_36hr	mouse_NMDA_48hr
0.220964	0.455967	0.438652	0.412539	retina	zebrafish_NMDA_36hr	mouse_NMDA_36hr
0.22345	0.498727	0.454697	0.376839	retina	zebrafish_NMDA_36hr	mouse_NMDA_24hr
0.200153	0.470638	0.455148	0.420155	retina	zebrafish_NMDA_36hr	mouse_NMDA_12hr
0.217047	0.429356	0.3802	0.400332	retina	zebrafish_NMDA_36hr	mouse_NMDA_6hr
0.253164	0.361881	0.316313	0.339702	retina	zebrafish_NMDA_36hr	mouse_NMDA_3hr
0.283654	0.79577	0.760779	0.377787	retina	zebrafish_NMDA_36hr	Macosko
0.200543	0.512689	0.427045	0.261988	retina	zebrafish_NMDA_20hr	mouse_LD_P60
0.208701	0.488946	0.414214	0.238484	retina	zebrafish_NMDA_20hr	mouse_LD_24hr
0.185892	0.406109	0.331659	0.243281	retina	zebrafish_NMDA_20hr	mouse_LD_10hr
0.213931	0.474881	0.400776	0.265665	retina	zebrafish_NMDA_20hr	mouse_LD_4hr
0.209379	0.443637	0.355794	0.246845	retina	zebrafish_NMDA_20hr	mouse_LD_0hr
0.185202	0.522676	0.439541	0.298071	retina	zebrafish_NMDA_20hr	mouse_NMDA_P60
0.218686	0.489587	0.427248	0.290251	retina	zebrafish_NMDA_20hr	mouse_NMDA_72hr
0.233981	0.565645	0.502794	0.34796	retina	zebrafish_NMDA_20hr	mouse_NMDA_48hr
0.254831	0.611068	0.52829	0.356407	retina	zebrafish_NMDA_20hr	mouse_NMDA_36hr
0.22457	0.530678	0.465188	0.321413	retina	zebrafish_NMDA_20hr	mouse_NMDA_24hr
0.205626	0.598048	0.552426	0.387795	retina	zebrafish_NMDA_20hr	mouse_NMDA_12hr
0.19985	0.477867	0.423251	0.317964	retina	zebrafish_NMDA_20hr	mouse_NMDA_6hr
0.212867	0.394957	0.340903	0.294591	retina	zebrafish_NMDA_20hr	mouse_NMDA_3hr
0.23486	0.757732	0.741519	0.356984	retina	zebrafish_NMDA_20hr	Macosko
0.164267	0.471536	0.391059	0.303667	retina	zebrafish_NMDA_10hr	mouse_LD_P60
0.174987	0.329782	0.293103	0.273313	retina	zebrafish_NMDA_10hr	mouse_LD_24hr
0.160491	0.26006	0.253022	0.299653	retina	zebrafish_NMDA_10hr	mouse_LD_10hr
0.17929	0.292768	0.279573	0.311711	retina	zebrafish_NMDA_10hr	mouse_LD_4hr
0.183855	0.367559	0.287007	0.248988	retina	zebrafish_NMDA_10hr	mouse_LD_0hr
0.145563	0.492198	0.400929	0.326369	retina	zebrafish_NMDA_10hr	mouse_NMDA_P60
0.194287	0.404476	0.333848	0.370894	retina	zebrafish_NMDA_10hr	mouse_NMDA_72hr
0.200739	0.302332	0.238967	0.39674	retina	zebrafish_NMDA_10hr	mouse_NMDA_48hr
0.153604	0.253426	0.228862	0.441743	retina	zebrafish_NMDA_10hr	mouse_NMDA_36hr
0.182006	0.410544	0.369099	0.379181	retina	zebrafish_NMDA_10hr	mouse_NMDA_24hr
0.216107	0.4922	0.479527	0.434215	retina	zebrafish_NMDA_10hr	mouse_NMDA_12hr
0.228272	0.524936	0.478233	0.423686	retina	zebrafish_NMDA_10hr	mouse_NMDA_6hr
0.202202	0.365746	0.324778	0.328234	retina	zebrafish_NMDA_10hr	mouse_NMDA_3hr
0.210459	0.797746	0.757387	0.370537	retina	zebrafish_NMDA_10hr	Macosko
0.160503	0.209549	0.246067	0.306652	retina	zebrafish_NMDA_4hr	mouse_LD_P60
0.141969	0.12514	0.141295	0.295244	retina	zebrafish_NMDA_4hr	mouse_LD_24hr
0.125598	0.107447	0.11003	0.249014	retina	zebrafish_NMDA_4hr	mouse_LD_10hr
0.1417	0.123397	0.138979	0.283392	retina	zebrafish_NMDA_4hr	mouse_LD_4hr
0.21973	0.241656	0.232891	0.323697	retina	zebrafish_NMDA_4hr	mouse_LD_0hr
0.147251	0.176936	0.231093	0.338734	retina	zebrafish_NMDA_4hr	mouse_NMDA_P60
0.138171	0.103625	0.140872	0.259657	retina	zebrafish_NMDA_4hr	mouse_NMDA_72hr
0.140553	0.115319	0.134323	0.269118	retina	zebrafish_NMDA_4hr	mouse_NMDA_48hr
0.133336	0.0619864	0.0883662	0.27502	retina	zebrafish_NMDA_4hr	mouse_NMDA_36hr
0.121674	0.0836601	0.118264	0.261353	retina	zebrafish_NMDA_4hr	mouse_NMDA_24hr
0.146777	0.0797992	0.12426	0.226425	retina	zebrafish_NMDA_4hr	mouse_NMDA_12hr
0.204249	0.173028	0.230571	0.341048	retina	zebrafish_NMDA_4hr	mouse_NMDA_6hr
0.201152	0.161916	0.203843	0.311498	retina	zebrafish_NMDA_4hr	mouse_NMDA_3hr
0.22651	0.785851	0.761092	0.375438	retina	zebrafish_NMDA_4hr	Macosko
0.143166	0.263661	0.269599	0.280608	retina	zebrafish_LD_Adult	mouse_LD_P60
0.152854	0.149798	0.150967	0.250169	retina	zebrafish_LD_Adult	mouse_LD_24hr
0.145207	0.119077	0.12965	0.198697	retina	zebrafish_LD_Adult	mouse_LD_10hr
0.154534	0.132089	0.143504	0.250994	retina	zebrafish_LD_Adult	mouse_LD_4hr
0.19854	0.231251	0.203022	0.262919	retina	zebrafish_LD_Adult	mouse_LD_0hr
0.127628	0.23699	0.253448	0.29391	retina	zebrafish_LD_Adult	mouse_NMDA_P60
0.13764	0.0964959	0.141258	0.175664	retina	zebrafish_LD_Adult	mouse_NMDA_72hr
0.123781	0.0378689	0.0641742	0.168869	retina	zebrafish_LD_Adult	mouse_NMDA_48hr
0.14672	0.104685	0.128417	0.222656	retina	zebrafish_LD_Adult	mouse_NMDA_36hr
0.127897	0.117595	0.163567	0.219054	retina	zebrafish_LD_Adult	mouse_NMDA_24hr
0.121229	0.199949	0.255385	0.25667	retina	zebrafish_LD_Adult	mouse_NMDA_12hr
0.14262	0.223778	0.243147	0.313968	retina	zebrafish_LD_Adult	mouse_NMDA_6hr
0.164753	0.170003	0.155066	0.285555	retina	zebrafish_LD_Adult	mouse_NMDA_3hr
0.243625	0.640791	0.664256	0.347608	retina	zebrafish_LD_Adult	Macosko
0.156751	0.127658	0.160789	0.146511	retina	zebrafish_LD_36hr	mouse_LD_P60
0.151688	0.0677402	0.0849453	0.141434	retina	zebrafish_LD_36hr	mouse_LD_24hr
0.12931	0.0738127	0.0846021	0.117316	retina	zebrafish_LD_36hr	mouse_LD_10hr
0.138179	0.0624273	0.0804783	0.151992	retina	zebrafish_LD_36hr	mouse_LD_4hr
0.147905	0.0905654	0.0872354	0.113477	retina	zebrafish_LD_36hr	mouse_LD_0hr
0.148753	0.200695	0.226738	0.180166	retina	zebrafish_LD_36hr	mouse_NMDA_P60
0.180593	0.126641	0.153995	0.188673	retina	zebrafish_LD_36hr	mouse_NMDA_72hr
0.150326	0.0848277	0.106764	0.240407	retina	zebrafish_LD_36hr	mouse_NMDA_48hr
0.136111	0.0946657	0.107438	0.24925	retina	zebrafish_LD_36hr	mouse_NMDA_36hr
0.154666	0.105786	0.149022	0.17479	retina	zebrafish_LD_36hr	mouse_NMDA_24hr
0.150684	0.0953881	0.164024	0.192751	retina	zebrafish_LD_36hr	mouse_NMDA_12hr
0.177064	0.145052	0.183489	0.189916	retina	zebrafish_LD_36hr	mouse_NMDA_6hr
0.172486	0.127284	0.127385	0.191881	retina	zebrafish_LD_36hr	mouse_NMDA_3hr
0.107665	0.109582	0.184588	0.171723	retina	zebrafish_LD_36hr	Macosko
0.15835	0.103885	0.136274	0.135616	retina	zebrafish_LD_20hr	mouse_LD_P60
0.147162	0.075732	0.108495	0.141265	retina	zebrafish_LD_20hr	mouse_LD_24hr
0.106538	0.0640483	0.0576048	0.0949082	retina	zebrafish_LD_20hr	mouse_LD_10hr
0.14287	0.0714385	0.0969619	0.158024	retina	zebrafish_LD_20hr	mouse_LD_4hr
0.16554	0.120457	0.134587	0.123841	retina	zebrafish_LD_20hr	mouse_LD_0hr
0.147318	0.132752	0.176658	0.166218	retina	zebrafish_LD_20hr	mouse_NMDA_P60
0.153713	0.100849	0.125048	0.183001	retina	zebrafish_LD_20hr	mouse_NMDA_72hr
0.140963	0.109917	0.112353	0.235564	retina	zebrafish_LD_20hr	mouse_NMDA_48hr
0.147823	0.102784	0.118245	0.239866	retina	zebrafish_LD_20hr	mouse_NMDA_36hr
0.138547	0.0882581	0.0975203	0.164907	retina	zebrafish_LD_20hr	mouse_NMDA_24hr
0.0894461	0.0517782	0.0594083	0.167386	retina	zebrafish_LD_20hr	mouse_NMDA_12hr
0.149667	0.115489	0.138342	0.164881	retina	zebrafish_LD_20hr	mouse_NMDA_6hr
0.187376	0.174948	0.20559	0.197515	retina	zebrafish_LD_20hr	mouse_NMDA_3hr
0.131628	0.118421	0.162917	0.135735	retina	zebrafish_LD_20hr	Macosko
0.127889	0.121814	0.14119	0.152016	retina	zebrafish_LD_10hr	mouse_LD_P60
0.137376	0.0959228	0.117115	0.173344	retina	zebrafish_LD_10hr	mouse_LD_24hr
0.114772	0.0972114	0.0910375	0.163763	retina	zebrafish_LD_10hr	mouse_LD_10hr
0.141885	0.075578	0.0979315	0.205557	retina	zebrafish_LD_10hr	mouse_LD_4hr
0.132982	0.0939219	0.096811	0.150803	retina	zebrafish_LD_10hr	mouse_LD_0hr
0.101895	0.174475	0.173029	0.170157	retina	zebrafish_LD_10hr	mouse_NMDA_P60
0.126946	0.12916	0.136241	0.194596	retina	zebrafish_LD_10hr	mouse_NMDA_72hr
0.151297	0.169309	0.19233	0.249049	retina	zebrafish_LD_10hr	mouse_NMDA_48hr
0.135869	0.137945	0.157661	0.23	retina	zebrafish_LD_10hr	mouse_NMDA_36hr
0.146448	0.140408	0.160944	0.18636	retina	zebrafish_LD_10hr	mouse_NMDA_24hr
0.110182	0.112542	0.148639	0.220441	retina	zebrafish_LD_10hr	mouse_NMDA_12hr
0.162586	0.179149	0.183973	0.237066	retina	zebrafish_LD_10hr	mouse_NMDA_6hr
0.177521	0.127753	0.132088	0.256082	retina	zebrafish_LD_10hr	mouse_NMDA_3hr
0.125177	0.112547	0.123326	0.126535	retina	zebrafish_LD_10hr	Macosko
0.125829	0.265483	0.250131	0.300364	retina	zebrafish_LD_4hr	mouse_LD_P60
0.129352	0.148573	0.136249	0.294647	retina	zebrafish_LD_4hr	mouse_LD_24hr
0.121503	0.121515	0.125726	0.291689	retina	zebrafish_LD_4hr	mouse_LD_10hr
0.119378	0.136727	0.131222	0.2967	retina	zebrafish_LD_4hr	mouse_LD_4hr
0.155085	0.183323	0.151805	0.289463	retina	zebrafish_LD_4hr	mouse_LD_0hr
0.106624	0.273106	0.247061	0.343073	retina	zebrafish_LD_4hr	mouse_NMDA_P60
0.167033	0.17491	0.181783	0.311159	retina	zebrafish_LD_4hr	mouse_NMDA_72hr
0.150241	0.112447	0.108499	0.304523	retina	zebrafish_LD_4hr	mouse_NMDA_48hr
0.171091	0.190627	0.192626	0.359594	retina	zebrafish_LD_4hr	mouse_NMDA_36hr
0.147254	0.208976	0.233429	0.3244	retina	zebrafish_LD_4hr	mouse_NMDA_24hr
0.114471	0.272432	0.305799	0.371467	retina	zebrafish_LD_4hr	mouse_NMDA_12hr
0.141057	0.282914	0.27217	0.408541	retina	zebrafish_LD_4hr	mouse_NMDA_6hr
0.159475	0.202538	0.167562	0.338045	retina	zebrafish_LD_4hr	mouse_NMDA_3hr
0.201063	0.659605	0.672536	0.377431	retina	zebrafish_LD_4hr	Macosko
0.035085	0.0380204	0.0347348	0.157291	retina	zebrafish_TNFa_Adult	chick_P10
0.0868973	0.0879938	0.0976916	0.221243	retina	zebrafish_TNFa_72hr	chick_P10
0.0861975	0.101862	0.109342	0.234717	retina	zebrafish_TNFa_36hr	chick_P10
0.0713142	0.084898	0.0885013	0.230302	retina	zebrafish_TNFa_20hr	chick_P10
0.0501098	0.0255528	0.0416817	0.186499	retina	zebrafish_TNFa_10hr	chick_P10
0.0516688	0.0335114	0.035169	0.108816	retina	zebrafish_NMDA_Adult	chick_P10
0.192146	0.561538	0.529561	0.32253	retina	zebrafish_NMDA_36hr	chick_P10
0.191881	0.448455	0.468413	0.349212	retina	zebrafish_NMDA_20hr	chick_P10
0.164907	0.239987	0.217816	0.310032	retina	zebrafish_NMDA_10hr	chick_P10
0.0910191	0.057023	0.0780809	0.151159	retina	zebrafish_NMDA_4hr	chick_P10
0.0728573	0.0421781	0.0487011	0.149625	retina	zebrafish_LD_Adult	chick_P10
0.0908125	0.196181	0.176207	0.194789	retina	zebrafish_LD_36hr	chick_P10
0.0896504	0.129474	0.122006	0.156392	retina	zebrafish_LD_20hr	chick_P10
0.100242	0.140217	0.126637	0.187263	retina	zebrafish_LD_10hr	chick_P10
0.0941044	0.0527894	0.0687459	0.159123	retina	zebrafish_LD_4hr	chick_P10
0.303744	0.385994	0.358704	0.523976	pancreas	panc8	FACS
0.418586	0.748798	0.795334	0.63501	pancreas	panc8	Baron_mouse
0.504759	0.787713	0.773926	0.631529	pancreas	Baron_human	FACS
0.508188	0.940262	0.941145	0.728431	pancreas	Baron_human	Baron_mouse
0.432171	0.778709	0.794608	0.632205	pancreas	FACS	Baron_human
0.462525	0.783673	0.749446	0.650533	pancreas	Baron_mouse	Baron_human
0.151889	0.626798	0.165408	0.511399	kidney	Wang_Kidney	Quake_10x_Kidney
0.192954	0.421906	0.390437	0.408919	kidney	Wang_Kidney	Adam
0.12609	0.740026	0.698571	0.26231	kidney	Wang_Kidney	Park
0.0640988	0.0980177	0.0819824	0.146717	kidney	Wang_Kidney	Karaiskos_mouse
0.250188	0.714847	0.289105	0.594451	kidney	Young	Quake_10x_Kidney
0.147338	0.164006	0.211202	0.382283	kidney	Young	Adam
0.098334	0.759203	0.658064	0.211777	kidney	Young	Park
0.112453	0.089615	0.143508	0.324212	kidney	Young	Karaiskos_mouse
0.241581	0.757544	0.390507	0.700422	kidney	Wu_human	Quake_10x_Kidney
0.258391	0.44809	0.504918	0.494872	kidney	Wu_human	Adam
0.228868	0.843925	0.864556	0.476358	kidney	Wu_human	Park
0.205025	0.870225	0.887448	0.485924	kidney	Wu_human	Karaiskos_mouse
0.186199	0.687534	0.167566	0.451243	kidney	Hochane	Quake_10x_Kidney
0.196896	0.355897	0.331148	0.357828	kidney	Hochane	Adam
0.0954124	0.708159	0.604435	0.161428	kidney	Hochane	Park
0.393416	0.597729	0.703103	0.298283	kidney	Hochane	Karaiskos_mouse
0.118172	0.174916	0.124539	0.353831	kidney	Quake_10x_Kidney	Wang_Kidney
0.128989	0.330252	0.19226	0.503907	kidney	Quake_10x_Kidney	Young
0.188129	0.62289	0.362727	0.496454	kidney	Quake_10x_Kidney	Wu_human
0.0815573	0.0594248	0.0377242	0.221807	kidney	Quake_10x_Kidney	Hochane
0.16117	0.433047	0.384304	0.304082	kidney	Adam	Wang_Kidney
0.0940504	0.274806	0.262973	0.451343	kidney	Adam	Young
0.193785	0.322425	0.438809	0.329857	kidney	Adam	Wu_human
0.264227	0.552494	0.483842	0.527902	kidney	Adam	Hochane
0.0203683	0.00562146	0.0158438	0.0977681	kidney	Park	Wang_Kidney
0.0936252	0.118382	0.164996	0.39202	kidney	Park	Young
0.237129	0.323681	0.494183	0.493265	kidney	Park	Wu_human
0.00392765	0.000144217	0.0200602	0.0865474	kidney	Park	Hochane
0.044545	0.243439	0.140015	0.0473982	kidney	Karaiskos_mouse	Wang_Kidney
0.0284304	0.0615175	0.0466139	0.201861	kidney	Karaiskos_mouse	Young
0.0894723	0.0540577	0.369474	0.253779	kidney	Karaiskos_mouse	Wu_human
0.0104419	0.0159398	0.0245105	0.0202216	kidney	Karaiskos_mouse	Hochane
