# Supplementary material for: Highly accurate reference and method selection for universal cross–data set cell type annotation with CAMUS
Source: HighWire-hosted journal article supplement (doi:10.1101/gr.280821.125), 2025-10-01
Supplement: Supplemental_Table_S3.xlsx [file Supplemental_Table_S3.xlsx]

## Sheet: Sheet1
Supplemental Table 3. Detailed informaiton of 80 scST datasets.
scST datasets	Technology	Tissue	#Genes
20170915 BD2	STARmap	Brain	166
20171115 BF5	STARmap	Brain	166
20171120 BF4	STARmap	Brain	166
20180410 BY3	STARmap	Brain	1020
20180417 BZ5	STARmap	Brain	166
20180419 BZ9	STARmap	Brain	166
20180421 BZ19	STARmap	Brain	166
20180424 BZ14	STARmap	Brain	166
20180505 BY3	STARmap	Brain	1020
AD cortex	STARmap PLUS	Brain	2766
normal cortex	STARmap PLUS	Brain	2766
DV1	MERFISH	Retina	500
DV2	MERFISH	Retina	500
DV3	MERFISH	Retina	500
MPOA 1	MERFISH	Brain	160
MPOA 10	MERFISH	Brain	160
MPOA 11	MERFISH	Brain	160
MPOA 12	MERFISH	Brain	161
MPOA 13	MERFISH	Brain	161
MPOA 14	MERFISH	Brain	161
MPOA 15	MERFISH	Brain	161
MPOA 16	MERFISH	Brain	161
MPOA 17	MERFISH	Brain	161
MPOA 18	MERFISH	Brain	161
MPOA 19	MERFISH	Brain	160
MPOA 2	MERFISH	Brain	161
MPOA 20	MERFISH	Brain	161
MPOA 21	MERFISH	Brain	161
MPOA 22	MERFISH	Brain	161
MPOA 23	MERFISH	Brain	161
MPOA 24	MERFISH	Brain	161
MPOA 25	MERFISH	Brain	161
MPOA 26	MERFISH	Brain	161
MPOA 27	MERFISH	Brain	161
MPOA 28	MERFISH	Brain	161
MPOA 29	MERFISH	Brain	160
MPOA 3	MERFISH	Brain	161
MPOA 30	MERFISH	Brain	161
MPOA 31	MERFISH	Brain	161
MPOA 32	MERFISH	Brain	161
MPOA 33	MERFISH	Brain	161
MPOA 34	MERFISH	Brain	161
MPOA 35	MERFISH	Brain	161
MPOA 36	MERFISH	Brain	160
MPOA 4	MERFISH	Brain	160
MPOA 5	MERFISH	Brain	160
MPOA 6	MERFISH	Brain	160
MPOA 7	MERFISH	Brain	160
MPOA 8	MERFISH	Brain	160
MPOA 9	MERFISH	Brain	160
kidney	MERFISH	Kidney	307
liver	MERFISH	Liver	307
Mop mouse1 sample1	MERFISH	Brain	254
Mop mouse1 sample2	MERFISH	Brain	254
Mop mouse1 sample3	MERFISH	Brain	254
Mop mouse1 sample4	MERFISH	Brain	254
Mop mouse1 sample5	MERFISH	Brain	254
Mop mouse1 sample6	MERFISH	Brain	254
Mop mouse2 sample1	MERFISH	Brain	254
Mop mouse2 sample2	MERFISH	Brain	254
Mop mouse2 sample3	MERFISH	Brain	254
Mop mouse2 sample4	MERFISH	Brain	254
Mop mouse2 sample5	MERFISH	Brain	254
Mop mouse2 sample6	MERFISH	Brain	254
osmFISH SScortex	osmFISH	Brain	33
seqFISH embryo1	seqFISH	Embryo	251
seqFISH embryo2	seqFISH	Embryo	251
seqFISH embryo3	seqFISH	Embryo	251
seqfish+ cortex	seqFISH+	Brain	10000
Slide-tags cortex	Slide-tags	Brain	36601
smFISH embryo1	osmFISH	Embryo	33
smFISH embryo2	osmFISH	Embryo	33
smFISH embryo3	osmFISH	Embryo	33
TN1	MERFISH	Retina	500
TN2	MERFISH	Retina	500
TN3	MERFISH	Retina	500
WT1	MERFISH	Retina	368
WT2	MERFISH	Retina	368
WT3	MERFISH	Retina	368
WT4	MERFISH	Retina	368
