# Supplementary material for: Highly accurate reference and method selection for universal cross–data set cell type annotation with CAMUS
Source: HighWire-hosted journal article supplement (doi:10.1101/gr.280821.125), 2025-10-01
Supplement: Supplemental_Table_S4.xlsx [file Supplemental_Table_S4.xlsx]

## Sheet: Sheet1
Supplemental Table 4. Detailed information of sc/snATAC-seq datasets.
Technique	Species	Tissue	#Cells
10x Multiome	Human	PBMC	9631
10x Multiome	Human	BMMC	8023
SHARE-seq	Mouse	Cortex	9190
SHARE-seq	Mouse	Skin	32231
10x scATAC-seq	Mouse	Mop	49805
SHARE-seq	Human	Retina	47343
10x snATAC-seq	Human	Cortex	66449
10x snATAC-seq	Human	Cortex	63969
10x scATAC-seq	Human	Kideny	24205
