# Supplementary material for: Highly accurate reference and method selection for universal cross–data set cell type annotation with CAMUS
Source: HighWire-hosted journal article supplement (doi:10.1101/gr.280821.125), 2025-10-01
Supplement: Supplemental_Table_S5.xlsx [file Supplemental_Table_S5.xlsx]

## Sheet: Sheet1
Supplemental Table 5. AMI, FMI, and ARI under different number of predicted clusters.
Number of predicted clusters	AMI	FMI	ARI
3	1	1	1
6	0.76	0.706	0.571
15	0.575	0.445	0.248
30	0.484	0.313	0.127
